# Supplementary material
Source: MDPI journal article supplement (https://www.mdpi.com/2311-5637/8/5/240)
Supplement: s1 [file s1]

Archive with 9 entries (9 files):
- Supplementary Figure S1.pdf
- Supplementary Figure S2.pdf
- Supplementary Figure S3.pdf
- Supplementary Figure S4.pdf
- Supplementary Figure S5.pdf
- Supplementary Table S1.pdf
- Supplementary Table S2.pdf
- Supplementary Table S3.xlsx
- Supplementary Table S4.xlsx
