# Supplementary material
Source: MDPI journal article supplement (https://www.mdpi.com/2311-5637/8/5/240)
Supplement: s1 [file s1 › Supplementary Table S3.xlsx]

## Sheet: Sheet1
Supplementary Table S3: 428 endogenous third-level pathways were considered rumen microbial metabolic pathways in this study
Pathway ID	Pathway level1	Pathway level2	Pathway level3	Pathwaymap	Mean
ko04214	Cellular Processes	Cell growth and death	Apoptosis - fly	http://www.genome.jp/kegg-bin/show_pathway?ko04214+K03386+K01527+K05770+K06640+K07827+K09848+K04427+K10586+K04371+K03262+K04412+K20216+K03175+K08738+K04426+K08791+K04431+K17065+K08860+K08669	849.444
ko04217	Cellular Processes	Cell growth and death	Necroptosis	http://www.genome.jp/kegg-bin/show_pathway?ko04217+K00688+K01915+K04079+K12350+K15040+K00261+K21634+K03853+K16342+K03767+K05864+K05863+K08847+K11251+K12196+K12191+K04447+K12197+K12195+K12194+K00522+K14381+K04515+K16195+K01367+K10802+K12198+K17065+K12192+K03173+K05401+K21421	29482.6
ko04218	Cellular Processes	Cell growth and death	Cellular senescence	http://www.genome.jp/kegg-bin/show_pathway?ko04218+K07830+K01110+K06627+K02183+K05868+K06640+K18753+K06269+K07827+K15040+K04456+K07203+K00922+K07208+K03853+K02206+K21776+K05864+K05863+K02833+K04958+K07201+K04371+K02087+K09389+K03982+K06641+K07829+K06268+K04348+K21771+K04960+K06626+K10752+K04368+K03362+K02216+K21770+K14381+K10866+K10865+K06620+K01367+K04851+K11411+K21769+K02091	2809.33
ko04210	Cellular Processes	Cell growth and death	Apoptosis	http://www.genome.jp/kegg-bin/show_pathway?ko04210+K01173+K01363+K06276+K01373+K07827+K01365+K04456+K00922+K03853+K02308+K02833+K04958+K04371+K10798+K05692+K03237+K01275+K08568+K04467+K01368+K04960+K04368+K10522+K08738+K04426+K01371+K07374+K01379+K01367+K08860+K03173+K01366+K08669	8720
ko04215	Cellular Processes	Cell growth and death	Apoptosis - multiple species	http://www.genome.jp/kegg-bin/show_pathway?ko04215+K10586+K10522+K08738+K08669+K08334	91.1111
ko04216	Cellular Processes	Cell growth and death	Ferroptosis	http://www.genome.jp/kegg-bin/show_pathway?ko04216+K01897+K00657+K08339+K15040+K08337+K21456+K14736+K11204+K05361+K00522+K05634+K10435+K21421	24548.6
ko04113	Cellular Processes	Cell growth and death	Meiosis - yeast	http://www.genome.jp/kegg-bin/show_pathway?ko04113+K01768+K04345+K06269+K03363+K07827+K07203+K03355+K06660+K12767+K02212+K06628+K02542+K04563+K02209+K02541+K10872+K03348+K03456+K04382+K02540+K12761+K06636+K02210+K06639+K03353+K02216+K03114+K06651+K03357+K02603+K06669+K06659+K06683+K11584+K08139+K03350+K02214+K12766+K03349+K12771+K02831+K02213+K03358	4257.89
ko04112	Cellular Processes	Cell growth and death	Cell cycle - Caulobacter	http://www.genome.jp/kegg-bin/show_pathway?ko04112+K03588+K11749+K03590+K01358+K01338+K03544+K03531+K02313+K02563+K03589+K02314+K02488+K13581+K02651+K13582+K06985+K13583+K13587+K13590+K07716	70493
ko04111	Cellular Processes	Cell growth and death	Cell cycle - yeast	http://www.genome.jp/kegg-bin/show_pathway?ko04111+K03364+K03363+K03355+K06675+K03094+K06660+K02212+K06628+K02542+K04563+K02209+K04371+K02541+K02219+K02515+K04354+K06641+K06674+K03348+K03456+K04382+K02540+K06636+K02210+K06639+K18669+K03353+K03868+K02216+K03114+K06677+K06651+K03357+K02603+K06669+K06659+K06676+K06683+K03350+K02214+K06655+K03349+K03347+K03361+K06685+K23469+K10259+K02831+K08866+K0221…	1874.67
ko04110	Cellular Processes	Cell growth and death	Cell cycle	http://www.genome.jp/kegg-bin/show_pathway?ko04110+K03364+K06627+K16197+K06631+K05868+K06640+K03363+K06630+K03355+K03094+K04802+K03083+K02206+K02212+K06628+K02542+K02202+K02209+K06633+K02087+K09389+K02541+K04683+K06641+K06067+K16198+K03348+K02540+K21771+K06636+K02210+K06626+K06639+K03353+K03868+K02216+K03357+K02603+K06669+K21770+K06642+K03350+K02214+K06620+K03349+K03347+K10500+K08866+K02213+K0664…	2501.44
ko04115	Cellular Processes	Cell growth and death	p53 signaling pathway	http://www.genome.jp/kegg-bin/show_pathway?ko04115+K01110+K05868+K06640+K02206+K02087+K03982+K06641+K10143+K06626+K02216+K10141+K21770+K04506+K08738+K06644+K02091	550.667
ko04114	Cellular Processes	Cell growth and death	Oocyte meiosis	http://www.genome.jp/kegg-bin/show_pathway?ko04114+K04345+K16197+K02183+K06631+K05868+K06269+K03363+K06630+K11481+K03355+K03094+K02206+K04958+K04371+K06633+K02087+K04373+K16198+K06268+K04348+K03348+K03456+K04382+K06636+K04960+K06626+K04368+K03362+K08836+K03353+K03868+K03357+K06669+K21770+K11584+K03350+K04515+K13056+K03349+K03347+K05861+K03358	4185.67
ko04810	Cellular Processes	Cell motility	Regulation of actin cytoskeleton	http://www.genome.jp/kegg-bin/show_pathway?ko04810+K05766+K07830+K05757+K03099+K05756+K06269+K07827+K00922+K00889+K05733+K05743+K02833+K04371+K05759+K05692+K00921+K05755+K05740+K05765+K00907+K07829+K05768+K05758+K04514+K04368+K04392+K05717+K00920+K05741+K17388+K06270+K12757+K04409+K01313+K23612+K05734+K17457	2075.22
ko02030	Cellular Processes	Cell motility	Bacterial chemotaxis	http://www.genome.jp/kegg-bin/show_pathway?ko02030+K10439+K02557+K03406+K02416+K10540+K03413+K02556+K03412+K02410+K03409+K03410+K03411+K03407+K03408+K12368+K02417+K13924+K00575+K03415+K05874+K10108+K03776	9434.89
ko02040	Cellular Processes	Cell motility	Flagellar assembly	http://www.genome.jp/kegg-bin/show_pathway?ko02040+K02397+K02419+K02406+K02557+K02392+K02416+K02556+K02401+K02405+K02410+K02386+K02400+K02389+K02388+K02387+K02413+K02396+K02412+K02409+K02407+K02390+K02417+K02421+K02422+K02418+K02414+K02411+K02420+K02398+K02394+K02408+K02393+K13820	6354.67
ko02026	Cellular Processes	Cellular community - eukaryotes	Biofilm formation - Escherichia coli	http://www.genome.jp/kegg-bin/show_pathway?ko02026+K01991+K00688+K00703+K00975+K02405+K07173+K03087+K04761+K07638+K03563+K06204+K10914+K02777+K00694+K07678+K03567+K02398+K07689+K11931+K21088+K18968+K07677+K07659+K11936+K11531+K07648+K14051	28584
ko04550	Cellular Processes	Cellular community - eukaryotes	Signaling pathways regulating pluripotency of stem cells	http://www.genome.jp/kegg-bin/show_pathway?ko04550+K07827+K04456+K03083+K00922+K02833+K04371+K04447+K04368+K11421	720.111
ko04540	Cellular Processes	Cellular community - eukaryotes	Gap junction	http://www.genome.jp/kegg-bin/show_pathway?ko04540+K07376+K04345+K03099+K07375+K07827+K02833+K04958+K04371+K02087+K08959+K04464+K05858+K04960+K19477+K04368+K07374+K04420+K02677	2258.56
ko04530	Cellular Processes	Cellular community - eukaryotes	Tight junction	http://www.genome.jp/kegg-bin/show_pathway?ko04530+K07198+K09489+K04345+K10591+K17260+K07901+K06109+K04802+K07199+K18584+K07902+K05692+K04354+K03456+K04382+K06069+K04514+K05031+K04392+K04426+K05702+K07374+K04431+K08018+K17388+K12757+K07298+K07839+K12751+K07200+K10352+K18050+K04851	3918.67
ko04520	Cellular Processes	Cellular community - eukaryotes	Adherens junction	http://www.genome.jp/kegg-bin/show_pathway?ko04520+K04427+K03115+K04371+K05692+K05694+K03097+K05698+K05693+K04392+K05702+K04468+K23612	580.333
ko04510	Cellular Processes	Cellular community - prokaryotes	Focal adhesion	http://www.genome.jp/kegg-bin/show_pathway?ko04510+K01110+K03099+K06276+K06269+K06238+K04456+K06237+K03083+K00922+K03853+K04349+K05733+K02833+K04371+K05692+K05740+K00907+K04514+K04368+K06236+K04392+K05717+K04659+K17388+K06270+K12757+K04409+K02677+K06252+K05734+K17457	2126.33
ko02025	Cellular Processes	Cellular community - prokaryotes	Biofilm formation - Pseudomonas aeruginosa	http://www.genome.jp/kegg-bin/show_pathway?ko02025+K01657+K01768+K01658+K02405+K03651+K12990+K20974+K03563+K11900+K21012+K12992+K10914+K16011+K21023+K11903+K07678+K11907+K21021+K21011+K02398+K20976+K11912+K21024+K11895+K11901+K11891+K02658+K07689+K21019+K11893+K11890+K20257+K20997+K20975+K21020+K13490+K11915+K21022+K11444+K21001+K20973	7581.33
ko02024	Cellular Processes	Cellular community - prokaryotes	Quorum sensing	http://www.genome.jp/kegg-bin/show_pathway?ko02024+K03210+K02035+K03073+K01657+K15580+K01996+K01218+K11752+K03106+K07706+K01897+K02031+K03070+K03217+K03076+K12257+K02055+K02033+K01998+K20265+K07699+K01626+K01999+K03110+K01997+K02034+K15581+K10823+K15582+K15583+K03075+K14982+K07667+K01658+K09936+K01995+K10555+K02032+K15654+K02052+K20276+K11216+K13075+K20532+K07173+K12990+K01728+K20344+K14645+K0832…	145416
ko05111	Cellular Processes	Cellular community - prokaryotes	Biofilm formation - Vibrio cholerae	http://www.genome.jp/kegg-bin/show_pathway?ko05111+K02458+K00640+K01791+K03606+K01912+K03092+K05946+K02472+K02454+K02405+K07173+K03087+K16554+K20988+K03563+K02456+K10914+K03666+K02777+K10942+K02455+K02453+K07678+K10909+K20955+K10943+K02460+K12276+K02452+K20956+K07689+K20952+K20922+K08604+K10917+K20959	26802.8
ko04144	Cellular Processes	Transport and catabolism	Endocytosis	http://www.genome.jp/kegg-bin/show_pathway?ko04144+K11839+K01115+K03283+K04646+K05757+K07891+K18467+K07904+K10591+K07903+K07901+K07889+K07897+K05756+K19476+K12471+K07905+K17917+K18464+K12486+K12492+K18466+K12493+K10365+K00889+K10364+K07876+K18465+K02833+K11981+K10396+K18468+K12188+K12199+K05755+K12196+K18442+K12472+K18443+K07887+K07888+K12191+K07937+K05758+K11827+K12479+K12197+K12184+K12200+K0606…	7161.44
ko04145	Cellular Processes	Transport and catabolism	Phagosome	http://www.genome.jp/kegg-bin/show_pathway?ko04145+K10416+K02154+K02145+K07375+K07889+K07897+K02155+K06560+K01365+K10413+K00914+K05692+K10956+K02150+K00921+K10414+K10415+K07887+K07888+K02146+K01368+K07342+K02151+K03990+K06563+K08517+K03661+K04392+K07898+K13882+K02144+K04659+K08057+K07374+K02149+K06528+K02147+K10068+K02148+K03662+K13505+K21421	2456
ko04146	Cellular Processes	Transport and catabolism	Peroxisome	http://www.genome.jp/kegg-bin/show_pathway?ko04146+K03426+K01897+K00031+K04564+K00803+K00232+K00869+K01640+K11147+K13279+K07513+K13241+K03781+K11517+K00830+K13346+K00273+K08746+K04565+K13352+K13341+K13356+K01796	29740.8
ko04140	Cellular Processes	Transport and catabolism	Autophagy - animal	http://www.genome.jp/kegg-bin/show_pathway?ko04140+K16196+K07198+K07830+K01110+K08343+K07359+K04345+K01363+K07874+K06276+K16185+K07901+K07897+K08339+K21357+K07827+K01365+K08269+K04456+K07203+K17908+K00922+K07208+K04427+K08341+K02833+K04958+K08337+K04371+K00914+K16186+K03237+K08803+K06068+K07829+K08342+K07925+K04382+K08333+K04368+K08266+K04688+K03175+K07898+K14381+K01379+K18082+K10802+K07298+K0792…	6377.78
ko04142	Cellular Processes	Transport and catabolism	Lysosome	http://www.genome.jp/kegg-bin/show_pathway?ko04142+K01197+K12373+K01192+K01206+K01186+K01201+K01205+K04646+K01195+K13444+K02154+K01202+K01363+K12391+K01373+K12402+K12350+K01369+K02155+K01365+K01136+K12316+K12394+K14410+K01052+K13289+K12400+K01134+K01125+K01074+K12383+K01158+K12393+K01275+K08568+K02146+K05656+K12392+K01368+K05642+K12311+K12385+K12389+K03661+K02144+K13443+K01371+K01379+K12386+K0120…	41611
ko04139	Cellular Processes	Transport and catabolism	Mitophagy - yeast	http://www.genome.jp/kegg-bin/show_pathway?ko04139+K08269+K07203+K00889+K08341+K03115+K08955+K04464+K11644+K03097+K08294+K11229+K17065+K02677+K11227	1010.33
ko04138	Cellular Processes	Transport and catabolism	Autophagy - yeast	http://www.genome.jp/kegg-bin/show_pathway?ko04138+K06902+K16196+K08343+K04345+K20182+K17260+K07897+K06027+K08339+K07827+K18083+K08269+K07203+K17908+K19800+K12767+K08341+K00654+K18584+K08337+K00914+K15296+K20195+K03237+K20181+K01381+K20179+K04464+K20180+K08342+K04382+K12479+K12761+K08333+K08266+K17607+K17900+K21157+K20178+K08516+K06655+K17606+K01336+K08334	3815.33
ko04137	Cellular Processes	Transport and catabolism	Mitophagy - animal	http://www.genome.jp/kegg-bin/show_pathway?ko04137+K11839+K07830+K17987+K07897+K08339+K21357+K07827+K08341+K03115+K02833+K21343+K04556+K07829+K03097+K07898+K14381+K04551+K08860+K05410+K08334	1166.44
ko04136	Cellular Processes	Transport and catabolism	Autophagy - other	http://www.genome.jp/kegg-bin/show_pathway?ko04136+K08343+K08339+K08269+K07203+K17908+K08341+K08337+K00914+K08342+K04382+K08333+K08266+K17606+K08334	1077.89
ko02060	Environmental Information Processing	Membrane transport	Phosphotransferase system (PTS)	http://www.genome.jp/kegg-bin/show_pathway?ko02060+K00882+K02782+K02770+K03475+K08483+K02800+K02793+K02810+K02768+K02798+K02775+K02791+K02794+K02783+K02773+K02757+K02761+K02806+K02804+K02777+K02781+K02821+K02784+K19509+K02815+K02795+K02822+K02750+K02819+K11192+K02788+K02796+K02759+K20118+K19508+K20108+K02760+K19507+K02744+K02774+K02814+K02813+K10984+K10986+K17465+K02753+K19506+K17466+K17467+K0848…	8962.22
ko03070	Environmental Information Processing	Membrane transport	Bacterial secretion system	http://www.genome.jp/kegg-bin/show_pathway?ko03070+K03210+K03073+K02458+K03205+K03106+K03070+K03217+K03076+K12257+K03118+K03110+K12340+K03075+K03074+K03117+K03116+K02454+K03195+K11904+K02456+K03072+K04058+K03223+K03071+K02455+K02453+K11903+K03221+K03230+K11907+K03219+K03224+K03229+K11004+K11003+K02460+K03226+K02452+K11912+K03222+K03227+K03199+K04056+K03196+K11891+K03228+K03203+K03225+K11915+K11892	63819.3
ko02010	Environmental Information Processing	Membrane transport	ABC transporters	http://www.genome.jp/kegg-bin/show_pathway?ko02010+K02007+K23509+K10192+K11070+K23537+K11085+K10188+K09816+K07335+K09690+K17318+K02006+K15580+K11069+K02012+K02040+K10441+K17319+K01996+K23535+K09693+K17073+K11071+K02073+K02037+K05846+K17215+K10118+K11072+K10439+K16786+K09812+K15771+K02067+K10820+K07091+K09817+K18889+K23059+K10112+K02072+K02010+K15555+K10440+K06861+K05813+K09811+K18890+K01998+K0980…	219968
ko04066	Environmental Information Processing	Signal transduction	HIF-1 signaling pathway	http://www.genome.jp/kegg-bin/show_pathway?ko04066+K01689+K00927+K00844+K00016+K00134+K00850+K01623+K04456+K02991+K07203+K00922+K00162+K03259+K13241+K04371+K03982+K14736+K01116+K04368+K00161+K04688+K03868+K04515+K02677+K04372+K21421	19936.7
ko04064	Environmental Information Processing	Signal transduction	NF-kappa B signaling pathway	http://www.genome.jp/kegg-bin/show_pathway?ko04064+K04427+K03115+K04733+K03097+K04467+K01116+K03175+K05856+K03174+K10577+K03173+K04730	221.889
ko04068	Environmental Information Processing	Signal transduction	FoxO signaling pathway	http://www.genome.jp/kegg-bin/show_pathway?ko04068+K07198+K01596+K01110+K04564+K03099+K06276+K06631+K05868+K07827+K04456+K13303+K08960+K00922+K07199+K02206+K08341+K02833+K03781+K07201+K04371+K11434+K13302+K11838+K04411+K08863+K04467+K21771+K04368+K08861+K21770+K04468+K13304+K07298+K07200+K08862+K11411+K11431	6500.56
ko04668	Environmental Information Processing	Signal transduction	TNF signaling pathway	http://www.genome.jp/kegg-bin/show_pathway?ko04668+K04430+K04456+K00922+K04427+K04371+K08847+K04445+K01394+K04467+K04368+K04426+K04431+K17065+K03174+K03173+K10165	531.667
ko02020	Environmental Information Processing	Signal transduction	Two-component system	http://www.genome.jp/kegg-bin/show_pathway?ko02020+K01034+K01991+K05964+K01910+K01915+K02040+K07652+K07706+K09474+K04771+K00027+K07654+K08641+K01791+K13927+K00425+K01179+K07646+K00244+K01051+K03367+K01104+K07792+K07260+K07793+K02313+K01077+K07699+K00626+K01644+K07783+K00426+K07636+K07718+K02406+K03092+K03406+K12340+K07720+K23514+K01643+K14982+K07668+K09696+K07667+K07657+K07658+K02584+K07714+K0765…	144837
ko04630	Environmental Information Processing	Signal transduction	Jak-STAT signaling pathway	http://www.genome.jp/kegg-bin/show_pathway?ko04630+K03099+K04456+K07203+K00922+K02833+K04447+K07293	416.556
ko04070	Environmental Information Processing	Signal transduction	Phosphatidylinositol signaling system	http://www.genome.jp/kegg-bin/show_pathway?ko04070+K00981+K01092+K01110+K02183+K00901+K21797+K18083+K20279+K19801+K00922+K00889+K13024+K04958+K00914+K18081+K21798+K00921+K00888+K05857+K05858+K01108+K04960+K01116+K01106+K03084+K00999+K20278+K05860+K01099+K00920+K15909+K18082+K00923+K05861+K02677+K10047	9832.78
ko04071	Environmental Information Processing	Signal transduction	Sphingolipid signaling pathway	http://www.genome.jp/kegg-bin/show_pathway?ko04071+K12349+K01115+K01110+K05665+K06276+K01634+K12350+K07827+K04456+K11583+K00922+K18953+K02833+K00654+K04371+K23727+K04354+K03456+K04382+K05858+K04514+K04368+K04392+K04718+K11584+K04426+K01379+K17388+K02677+K18050+K03173	2690.33
ko04072	Environmental Information Processing	Signal transduction	Phospholipase D signaling pathway	http://www.genome.jp/kegg-bin/show_pathway?ko04072+K07830+K01115+K03099+K00901+K07827+K04456+K07203+K00922+K00889+K07208+K16342+K02833+K04371+K07834+K21289+K07829+K07937+K05858+K01116+K04368+K07835+K09821+K13509+K18441+K04718+K01313+K02677+K07293	1673.56
ko04075	Environmental Information Processing	Signal transduction	Plant hormone signal transduction	http://www.genome.jp/kegg-bin/show_pathway?ko04075+K14487+K14505+K14506+K13416+K14510+K13449+K13413+K14498+K14489	61.1111
ko04350	Environmental Information Processing	Signal transduction	TGF-beta signaling pathway	http://www.genome.jp/kegg-bin/show_pathway?ko04350+K03094+K04371+K04683+K03456+K04382+K04514+K04688+K03868+K03347+K04678	981.444
ko04310	Environmental Information Processing	Signal transduction	Wnt signaling pathway	http://www.genome.jp/kegg-bin/show_pathway?ko04310+K08957+K04345+K08960+K03094+K03083+K04427+K03115+K06268+K04348+K03097+K05858+K04507+K03362+K03868+K04512+K04499+K04392+K04506+K04515+K04468+K17388+K03347+K02677	2077
ko04330	Environmental Information Processing	Signal transduction	Notch signaling pathway	http://www.genome.jp/kegg-bin/show_pathway?ko04330+K06067+K06058+K06063+K06062	83.6667
ko04341	Environmental Information Processing	Signal transduction	Hedgehog signaling pathway - fly	http://www.genome.jp/kegg-bin/show_pathway?ko04341+K06228+K08957+K04345+K08958+K08960+K03094+K03083+K03869+K03362+K03868+K03347+K04678	1981.44
ko04016	Environmental Information Processing	Signal transduction	MAPK signaling pathway - plant	http://www.genome.jp/kegg-bin/show_pathway?ko04016+K17686+K02183+K00940+K20726+K03781+K20604+K20607+K20603+K20716+K20718+K20606+K13420+K13414+K13416+K14510+K13449+K20535+K20717+K13413+K14498	2840.22
ko04014	Environmental Information Processing	Signal transduction	Ras signaling pathway	http://www.genome.jp/kegg-bin/show_pathway?ko04014+K07830+K01115+K04345+K03099+K02183+K07889+K07827+K04456+K00922+K16342+K04349+K05733+K02833+K04371+K19613+K07834+K07829+K07887+K07888+K04411+K04467+K01116+K04368+K07835+K04392+K05860+K16817+K12326+K05702+K04409+K02677+K04536+K05410+K05734+K07293	2536.44
ko04015	Environmental Information Processing	Signal transduction	Rap1 signaling pathway	http://www.genome.jp/kegg-bin/show_pathway?ko04015+K02183+K07827+K04456+K00922+K02833+K04371+K05759+K05692+K07834+K07829+K06070+K05858+K06069+K01116+K04368+K07835+K04392+K05860+K05702+K08018+K02677	1460
ko04012	Environmental Information Processing	Signal transduction	ErbB signaling pathway	http://www.genome.jp/kegg-bin/show_pathway?ko04012+K03099+K04430+K07827+K04456+K07203+K03083+K00922+K05733+K02833+K04371+K01116+K04368+K04688+K04515+K04431+K04409+K02677+K05734	949.667
ko04013	Environmental Information Processing	Signal transduction	MAPK signaling pathway - fly	http://www.genome.jp/kegg-bin/show_pathway?ko04013+K04564+K14290+K03099+K16197+K04430+K07827+K06689+K04427+K04371+K05759+K08840+K20216+K04382+K04368+K03175+K17608+K04392+K04506+K04426+K20223+K04431+K04461+K07293+K04417	2729.44
ko04010	Environmental Information Processing	Signal transduction	MAPK signaling pathway	http://www.genome.jp/kegg-bin/show_pathway?ko04010+K07830+K03283+K04460+K04421+K04345+K03099+K04430+K07827+K04456+K16342+K04349+K04427+K02308+K02833+K04371+K04445+K04373+K04457+K04412+K07829+K04464+K20216+K06268+K04411+K04348+K04733+K04467+K04368+K03175+K04459+K04392+K21278+K21946+K12326+K04426+K04856+K04468+K04431+K08018+K04420+K04461+K04409+K02677+K04851+K04853+K03173+K04372+K04730	2143
ko04011	Environmental Information Processing	Signal transduction	MAPK signaling pathway - yeast	http://www.genome.jp/kegg-bin/show_pathway?ko04011+K02218+K10591+K06276+K06630+K19704+K00889+K04563+K03781+K04371+K11230+K00888+K02515+K04464+K00006+K03114+K06651+K19833+K11228+K08294+K11229+K23469+K19806+K04409+K02677+K04536+K11227	2179.56
ko04391	Environmental Information Processing	Signal transduction	Hippo signaling pathway - fly	http://www.genome.jp/kegg-bin/show_pathway?ko04391+K16197+K06630+K08960+K16675+K05692+K04354+K04412+K03456+K04382+K06069+K06626+K08791+K06685+K16669	1357.89
ko04390	Environmental Information Processing	Signal transduction	Hippo signaling pathway	http://www.genome.jp/kegg-bin/show_pathway?ko04390+K16197+K06269+K06630+K08960+K03083+K08959+K05692+K03982+K04354+K04412+K16198+K03456+K04382+K06069+K03362+K08791+K06685	2107.33
ko04392	Environmental Information Processing	Signal transduction	Hippo signaling pathway - multiple species	http://www.genome.jp/kegg-bin/show_pathway?ko04392+K02218+K08960+K04412+K06683+K08791+K06685+K04409+K16669	1092.67
ko04152	Environmental Information Processing	Signal transduction	AMPK signaling pathway	http://www.genome.jp/kegg-bin/show_pathway?ko04152+K07198+K00850+K01596+K07359+K03234+K06627+K07877+K06276+K07903+K07901+K21357+K04456+K07203+K07905+K11583+K00021+K00922+K07208+K07199+K04427+K07201+K00665+K03841+K07881+K07297+K04354+K07188+K03456+K04382+K04688+K05031+K11584+K07298+K07200+K11411	9470.67
ko04151	Environmental Information Processing	Signal transduction	PI3K-Akt signaling pathway	http://www.genome.jp/kegg-bin/show_pathway?ko04151+K04079+K07198+K01596+K01110+K03099+K16197+K06276+K07827+K06238+K06630+K04456+K02991+K07203+K06237+K11583+K13303+K03083+K00922+K07208+K02206+K03259+K02833+K04371+K13302+K09420+K04354+K09487+K21289+K16198+K04447+K03456+K04382+K04467+K06626+K04368+K08266+K04688+K06236+K04392+K05717+K11584+K04659+K13304+K07298+K02677+K04536+K06252+K02091	12835.2
ko04150	Environmental Information Processing	Signal transduction	mTOR signaling pathway	http://www.genome.jp/kegg-bin/show_pathway?ko04150+K07198+K01110+K03099+K06276+K16185+K02145+K15728+K21357+K07827+K08269+K04456+K02991+K07203+K03083+K00922+K07208+K03259+K02833+K04371+K13302+K16186+K02150+K04373+K04467+K08267+K02151+K04368+K08266+K04688+K14004+K02144+K14995+K20408+K07298+K02677+K02149+K02147+K02148	3665.22
ko04371	Environmental Information Processing	Signal transduction	Apelin signaling pathway	http://www.genome.jp/kegg-bin/show_pathway?ko04371+K07198+K07830+K04345+K02183+K07827+K04456+K02991+K07203+K07199+K08341+K02833+K13241+K04958+K04371+K00914+K03982+K11265+K21289+K00907+K07829+K07188+K05858+K04960+K08333+K04368+K04962+K04688+K05869+K04718+K07200+K18050+K04536+K05849+K04961+K08334	3369.89
ko04370	Environmental Information Processing	Signal transduction	VEGF signaling pathway	http://www.genome.jp/kegg-bin/show_pathway?ko04370+K07827+K04456+K00922+K16342+K02833+K04371+K06268+K04348+K01116+K04368+K04392+K04718+K02677	614.889
ko04024	Environmental Information Processing	Signal transduction	cAMP signaling pathway	http://www.genome.jp/kegg-bin/show_pathway?ko04024+K07830+K01115+K05850+K04345+K00232+K02183+K06269+K04456+K00922+K13293+K04371+K04955+K11265+K05673+K07829+K07188+K04514+K04368+K04962+K01539+K05031+K04392+K05860+K05869+K05702+K04515+K17388+K06270+K04409+K04851+K04853+K01538+K05853	4306.11
ko04020	Environmental Information Processing	Signal transduction	Calcium signaling pathway	http://www.genome.jp/kegg-bin/show_pathway?ko04020+K05850+K13755+K04345+K00871+K08794+K02183+K15040+K05863+K13241+K04958+K00476+K05857+K00907+K06268+K04348+K05858+K04960+K01116+K04962+K05860+K05869+K04718+K04515+K04856+K05865+K05861+K09565+K02677+K16896+K04851+K04853+K05849+K04961+K05853	3193
ko04340	Environmental Information Processing	Signal transduction	Hedgehog signaling pathway	http://www.genome.jp/kegg-bin/show_pathway?ko04340+K08957+K04345+K08958+K08960+K03083+K08959+K10604+K03869+K10394+K03362+K23664+K03347+K04678+K06233	1640.22
ko04022	Environmental Information Processing	Signal transduction	cGMP-PKG signaling pathway	http://www.genome.jp/kegg-bin/show_pathway?ko04022+K05850+K07376+K02183+K06269+K15040+K04456+K05863+K04958+K04371+K21289+K00907+K06268+K04348+K05858+K04960+K19477+K04514+K04368+K01539+K05274+K17388+K06270+K09565+K17751+K18050+K04851+K04853+K04936+K05849+K01538+K05853	3897.67
ko04514	Environmental Information Processing	Signaling molecules and interaction	Cell adhesion molecules (CAMs)	http://www.genome.jp/kegg-bin/show_pathway?ko04514+K07378+K05693+K06496+K06478	5.44444
ko04512	Environmental Information Processing	Signaling molecules and interaction	ECM-receptor interaction	http://www.genome.jp/kegg-bin/show_pathway?ko04512+K06238+K06237+K23573+K06264+K06236+K05717+K04659+K06255+K23379+K06252	142.333
ko04080	Environmental Information Processing	Signaling molecules and interaction	Neuroactive ligand-receptor interaction	http://www.genome.jp/kegg-bin/show_pathway?ko04080+K05770+K01315+K09821+K03990+K01312+K04578+K01313+K05185	323.889
ko04141	Genetic Information Processing	Folding, sorting and degradation	Protein processing in endoplasmic reticulum	http://www.genome.jp/kegg-bin/show_pathway?ko04141+K04079+K13993+K16196+K03283+K13525+K09580+K10575+K14003+K09503+K03094+K09584+K06689+K03853+K07151+K12668+K05546+K09485+K14018+K10839+K13250+K09486+K14016+K14006+K14026+K10956+K03237+K14007+K12666+K04556+K10950+K14012+K09490+K09487+K09518+K12670+K07953+K09540+K12275+K09582+K10578+K14015+K14002+K09507+K01456+K07342+K08056+K09525+K13719+K04523+K0386…	13913.7
ko04130	Genetic Information Processing	Folding, sorting and degradation	SNARE interactions in vesicular transport	http://www.genome.jp/kegg-bin/show_pathway?ko04130+K08515+K08486+K08489+K08517+K04560+K08516+K08506+K08490+K13505	269.333
ko03060	Genetic Information Processing	Folding, sorting and degradation	Protein export	http://www.genome.jp/kegg-bin/show_pathway?ko03060+K03210+K03073+K03106+K03070+K03217+K03100+K03076+K12257+K13280+K03118+K03110+K03075+K03074+K03117+K03101+K03105+K03116+K03072+K03071+K03108+K03107+K10956+K13431+K09490+K09540+K12275+K07342+K12946+K12948	62154.4
ko04122	Genetic Information Processing	Folding, sorting and degradation	Sulfur relay system	http://www.genome.jp/kegg-bin/show_pathway?ko04122+K03639+K00566+K04487+K21140+K03831+K21029+K03151+K03154+K03637+K03636+K21147+K03635+K03148+K01011+K07236+K11996+K21028+K14171+K04085+K14168	17948
ko04120	Genetic Information Processing	Folding, sorting and degradation	Ubiquitin mediated proteolysis	http://www.genome.jp/kegg-bin/show_pathway?ko04120+K03364+K10591+K20217+K10598+K10575+K10260+K03363+K10579+K03355+K03178+K03094+K10699+K06689+K10580+K10586+K10615+K04556+K10595+K10573+K10698+K10608+K10686+K10143+K10592+K10593+K10590+K10604+K10610+K03348+K10609+K10587+K10578+K03869+K02207+K10614+K03362+K03353+K10596+K10583+K03175+K03868+K04649+K10576+K10688+K03357+K10589+K04506+K03350+K10597+K0334…	2494.22
ko03050	Genetic Information Processing	Folding, sorting and degradation	Proteasome	http://www.genome.jp/kegg-bin/show_pathway?ko03050+K02730+K03029+K03028+K03420+K02737+K03032+K03030+K03066+K03432+K03433+K03064+K03061+K02728+K03031+K03038+K02726+K03036+K02729+K02725+K02736+K13527+K03033+K03039+K02731+K03037+K02738+K02734+K02732+K02739+K03063+K03065+K03035+K02735+K06691+K02727+K03062	1300.44
ko03018	Genetic Information Processing	Folding, sorting and degradation	RNA degradation	http://www.genome.jp/kegg-bin/show_pathway?ko03018+K12574+K01689+K05592+K04043+K18682+K00937+K00962+K03654+K03628+K04077+K12573+K03679+K00850+K08300+K11927+K03514+K12604+K00970+K03732+K12600+K03666+K12605+K11600+K13126+K22468+K10643+K12581+K12606+K07573+K12599+K12585+K12598+K12618+K12589+K01148+K18681+K12619+K12614+K12591+K03678+K03681	73051.3
ko03460	Genetic Information Processing	Replication and repair	Fanconi anemia pathway	http://www.genome.jp/kegg-bin/show_pathway?ko03460+K07466+K10896+K06640+K03165+K10901+K04482+K13960+K15362+K10858+K16618+K08734+K10848+K02350	705.111
ko03410	Genetic Information Processing	Replication and repair	Base excision repair	http://www.genome.jp/kegg-bin/show_pathway?ko03410+K01972+K01151+K03648+K07462+K02335+K03575+K01142+K10773+K21929+K01246+K10747+K01247+K03660+K03652+K10563+K02327+K02324+K04802+K13529+K10798+K03649+K10800+K10771+K04799+K05522+K02325+K10802+K02328+K03512	46313.3
ko03450	Genetic Information Processing	Replication and repair	Non-homologous end-joining	http://www.genome.jp/kegg-bin/show_pathway?ko03450+K01971+K04799+K10884+K06642+K10885+K10866+K10865+K10777+K10979+K03512	187.667
ko03030	Genetic Information Processing	Replication and repair	DNA replication	http://www.genome.jp/kegg-bin/show_pathway?ko03030+K02341+K02337+K02340+K03763+K02342+K01972+K02343+K03469+K03470+K02338+K02316+K02335+K02314+K03111+K10747+K07466+K03471+K10726+K04800+K22316+K10742+K18882+K02683+K02323+K02322+K02327+K02324+K04802+K02319+K02684+K02212+K02542+K02320+K02209+K04801+K10756+K02541+K02540+K04799+K02210+K02685+K02339+K10754+K10755+K02325+K02328	100842
ko03440	Genetic Information Processing	Replication and repair	Homologous recombination	http://www.genome.jp/kegg-bin/show_pathway?ko03440+K03581+K02341+K02337+K03629+K06187+K03584+K02340+K03763+K01159+K02342+K02343+K04066+K03655+K03553+K02338+K07462+K02335+K03551+K03550+K03111+K07466+K03582+K03583+K02327+K10877+K03165+K10901+K02339+K10866+K04482+K10865+K15362+K02328	135056
ko03430	Genetic Information Processing	Replication and repair	Mismatch repair	http://www.genome.jp/kegg-bin/show_pathway?ko03430+K03657+K02341+K02337+K03555+K02340+K03763+K03601+K02342+K01972+K07456+K03572+K02343+K02338+K07462+K03111+K08737+K06223+K03602+K10747+K07466+K02327+K04802+K01141+K03573+K10756+K08735+K02339+K10746+K10754+K10755+K10858+K10857+K02328+K08734	124575
ko03420	Genetic Information Processing	Replication and repair	Nucleotide excision repair	http://www.genome.jp/kegg-bin/show_pathway?ko03420+K03723+K03657+K03702+K03703+K03701+K01972+K02335+K10844+K10747+K07466+K10843+K02327+K02324+K04802+K02202+K10839+K10841+K10756+K10840+K10610+K10609+K03868+K10754+K10755+K02325+K02328+K06634+K10848	83688.7
ko03040	Genetic Information Processing	Transcription	Spliceosome	http://www.genome.jp/kegg-bin/show_pathway?ko03040+K12828+K03283+K12823+K12893+K12662+K12812+K12845+K12856+K12818+K12816+K12813+K12862+K12891+K12837+K12881+K12836+K12834+K12833+K12874+K12815+K12854+K12821+K12852+K12869+K12847+K12811+K12820+K11099+K12875+K09564+K06063+K12857+K12741+K13025+K12867+K12860+K12817+K12855+K12829+K12859+K12826+K12831+K12842+K12863+K12870+K09567+K12830+K12832+K12872+K1289…	1412.11
ko03022	Genetic Information Processing	Transcription	Basal transcription factors	http://www.genome.jp/kegg-bin/show_pathway?ko03022+K10844+K10843+K03124+K03120+K03136+K02202+K03130+K14651+K03123+K03132+K03125+K03128+K03131+K06634+K03126+K03133	984.556
ko03020	Genetic Information Processing	Transcription	RNA polymerase	http://www.genome.jp/kegg-bin/show_pathway?ko03020+K03043+K03040+K03046+K03047+K03060+K03041+K03044+K03006+K03048+K03050+K03055+K03010+K03013+K03021+K03042+K03045+K03018+K03053+K03058+K03049+K03027+K02999+K03016+K03051+K03011+K03017+K03026+K03008+K13798+K03002+K03014+K03059+K03056+K03015+K03007+K03012+K14721+K13797+K03000	32348.1
ko03008	Genetic Information Processing	Translation	Ribosome biogenesis in eukaryotes	http://www.genome.jp/kegg-bin/show_pathway?ko03008+K03685+K18532+K14290+K03539+K14758+K03264+K07562+K13288+K14575+K06943+K12845+K14558+K14564+K11131+K03115+K14569+K12618+K14574+K14559+K14537+K11130+K03537+K14538+K14572+K03538+K14553+K14561+K14550+K07936+K14567+K03097+K14521+K14565+K12619+K14554+K07178+K14563+K07179+K14539+K14568+K14552+K11129+K11108+K14556+K14560+K11128+K14571+K14536+K01164+K1455…	6092.22
ko00970	Genetic Information Processing	Translation	Aminoacyl-tRNA biosynthesis	http://www.genome.jp/kegg-bin/show_pathway?ko00970+K01892+K01870+K01867+K01893+K01873+K01869+K02435+K00604+K01872+K01889+K01876+K01881+K01884+K01883+K02434+K01875+K01885+K01868+K01887+K01874+K01880+K01890+K01886+K02433+K04566+K09698+K01866+K09759+K04567+K01042+K01879+K09482+K03330+K01878+K11627+K22503+K03341+K14164	160154
ko03013	Genetic Information Processing	Translation	RNA transport	http://www.genome.jp/kegg-bin/show_pathway?ko03013+K03113+K00974+K00784+K03231+K14290+K03539+K03243+K03260+K03241+K07562+K13126+K12812+K03680+K03540+K03259+K03242+K14297+K03237+K14314+K12881+K13171+K03236+K03537+K13175+K03262+K03257+K03538+K14326+K14292+K14293+K12160+K07936+K03251+K14324+K03754+K03238+K14307+K12875+K03246+K03239+K13025+K14298+K03240+K14004+K03254+K03252+K03250+K14319+K14325+K0116…	11105.4
ko03010	Genetic Information Processing	Translation	Ribosome	http://www.genome.jp/kegg-bin/show_pathway?ko03010+K02886+K02996+K02992+K02959+K02968+K02945+K02892+K02879+K02888+K02864+K02897+K02986+K02878+K02931+K02982+K02946+K02933+K02874+K02956+K02906+K02994+K02952+K02926+K02909+K02895+K02890+K02876+K02961+K02904+K02948+K02939+K02871+K02950+K02990+K02967+K02916+K02965+K02977+K02863+K02887+K02913+K02867+K02919+K02884+K02970+K02907+K02988+K02958+K02966+K0290…	106447
ko03015	Genetic Information Processing	Translation	mRNA surveillance pathway	http://www.genome.jp/kegg-bin/show_pathway?ko03015+K03265+K06965+K06269+K13126+K11583+K12812+K14407+K14403+K12881+K04354+K13171+K03267+K14326+K03456+K04382+K14324+K00565+K14416+K12875+K14411+K15542+K14962+K13025+K14399+K14376+K11584+K14404+K14396+K14402+K14325+K14401+K12883+K14328+K14323	2532
ko05202	Human Diseases	Cancer: overview	Transcriptional misregulation in cancer	http://www.genome.jp/kegg-bin/show_pathway?ko05202+K13098+K06627+K12823+K07201+K01394+K11253+K06067+K14651+K11644+K02211+K21946+K10500+K15626+K15627	281.444
ko05204	Human Diseases	Cancer: overview	Chemical carcinogenesis	http://www.genome.jp/kegg-bin/show_pathway?ko05204+K04097+K00799+K00699+K00079+K00121+K13951+K23790	116.667
ko05206	Human Diseases	Cancer: overview	MicroRNAs in cancer	http://www.genome.jp/kegg-bin/show_pathway?ko05206+K00558+K05658+K01110+K05665+K03099+K01425+K17398+K07827+K07203+K00922+K02833+K04371+K09389+K04445+K06067+K04464+K11592+K06626+K01116+K17387+K04514+K04368+K13863+K12561+K11430+K08670+K12035+K06620+K02677+K23551+K10577+K18050+K06252+K11411+K05734+K02091	11599.4
ko05205	Human Diseases	Cancer: overview	Proteoglycans in cancer	http://www.genome.jp/kegg-bin/show_pathway?ko05205+K03685+K07830+K04345+K03099+K12823+K06276+K06269+K07827+K01365+K04456+K02991+K07203+K00922+K02833+K04958+K04371+K05692+K10380+K07829+K04960+K01116+K04514+K04368+K04688+K06236+K04392+K05860+K05717+K06255+K04515+K17388+K06270+K04409+K02677+K07293+K17457	6714.11
ko05200	Human Diseases	Cancer: overview	Pathways in cancer	http://www.genome.jp/kegg-bin/show_pathway?ko05200+K04079+K01115+K01110+K01679+K08737+K06627+K04345+K03099+K00355+K02183+K07827+K04456+K07203+K06237+K00799+K03094+K03083+K00922+K09848+K02206+K02833+K13241+K07201+K04371+K09389+K07834+K04445+K08803+K11256+K02219+K09487+K06067+K22182+K04447+K04411+K04467+K05858+K08735+K06626+K01116+K04514+K04368+K07835+K09821+K04688+K03175+K03868+K04392+K05717+K0873…	12693.7
ko05203	Human Diseases	Cancer: overview	Viral carcinogenesis	http://www.genome.jp/kegg-bin/show_pathway?ko05203+K00873+K11407+K15305+K06627+K04345+K16197+K11252+K03124+K03363+K07827+K06630+K00922+K02206+K11594+K15979+K03120+K03136+K02833+K04371+K02087+K11254+K06067+K11838+K16198+K05768+K10610+K15306+K02146+K10587+K06626+K03990+K06063+K02216+K03123+K04392+K06062+K16195+K03174+K03173+K03062+K02091	5502.89
ko05231	Human Diseases	Cancer: overview	Choline metabolism in cancer	http://www.genome.jp/kegg-bin/show_pathway?ko05231+K15377+K01115+K03099+K06276+K08202+K00901+K07827+K00968+K04456+K07203+K00922+K00889+K07208+K16342+K02833+K04371+K01116+K06515+K04368+K04688+K04392+K06128+K02677	1949.78
ko05230	Human Diseases	Cancer: overview	Central carbon metabolism in cancer	http://www.genome.jp/kegg-bin/show_pathway?ko05230+K00873+K00844+K00016+K01834+K00850+K01110+K01425+K00036+K07827+K04456+K07203+K00922+K00162+K02833+K04371+K04368+K00161+K11416+K11413+K12407	12681.7
ko05235	Human Diseases	Cancer: overview	PD-L1 expression and PD-1 checkpoint pathway in cancer	http://www.genome.jp/kegg-bin/show_pathway?ko05235+K01110+K04421+K07827+K04456+K07203+K00922+K03115+K02833+K04371+K04447+K06268+K04348+K03097+K04467+K01116+K04368+K04688+K03175+K05856+K07293	1313.78
ko05219	Human Diseases	Cancer: specific types	Bladder cancer	http://www.genome.jp/kegg-bin/show_pathway?ko05219+K00758+K07827+K02833+K04371+K09389+K04445+K08803+K04368+K06620	377.444
ko05218	Human Diseases	Cancer: specific types	Melanoma	http://www.genome.jp/kegg-bin/show_pathway?ko05218+K01110+K07827+K04456+K00922+K02833+K04371+K09389+K04368+K06620+K02091	870.111
ko05217	Human Diseases	Cancer: specific types	Basal cell carcinoma	http://www.genome.jp/kegg-bin/show_pathway?ko05217+K03083	198.111
ko05216	Human Diseases	Cancer: specific types	Thyroid cancer	http://www.genome.jp/kegg-bin/show_pathway?ko05216+K07827+K02833+K04371+K04368	286.889
ko05215	Human Diseases	Cancer: specific types	Prostate cancer	http://www.genome.jp/kegg-bin/show_pathway?ko05215+K04079+K01110+K03099+K06276+K07827+K04456+K07203+K03083+K00922+K02206+K02833+K07201+K04371+K09389+K01394+K09487+K04467+K06626+K04368+K06620+K23790	8646.44
ko05214	Human Diseases	Cancer: specific types	Glioma	http://www.genome.jp/kegg-bin/show_pathway?ko05214+K01110+K03099+K08794+K02183+K07827+K04456+K07203+K00922+K02833+K04371+K09389+K01116+K04368+K05869+K04515+K06620+K02677+K02091	1866.67
ko05213	Human Diseases	Cancer: specific types	Endometrial cancer	http://www.genome.jp/kegg-bin/show_pathway?ko05213+K01110+K03099+K06276+K07827+K04456+K03083+K00922+K02833+K04371+K04368+K08734	1256.11
ko05212	Human Diseases	Cancer: specific types	Pancreatic cancer	http://www.genome.jp/kegg-bin/show_pathway?ko05212+K01115+K07827+K04456+K07203+K00922+K04371+K09389+K07834+K04467+K04368+K07835+K04688+K04392+K04482+K06620+K02091	1131.33
ko05211	Human Diseases	Cancer: specific types	Renal cell carcinoma	http://www.genome.jp/kegg-bin/show_pathway?ko05211+K01679+K03099+K07827+K04456+K00922+K05733+K02833+K04371+K04368+K03868+K04392+K04409+K05734+K07293	2137.33
ko05210	Human Diseases	Cancer: specific types	Colorectal cancer	http://www.genome.jp/kegg-bin/show_pathway?ko05210+K08737+K03099+K07827+K04456+K07203+K03083+K00922+K02833+K04371+K07834+K08735+K04368+K07835+K04688+K04392+K08738+K08734	1053.22
ko05226	Human Diseases	Cancer: specific types	Gastric cancer	http://www.genome.jp/kegg-bin/show_pathway?ko05226+K05658+K08957+K03099+K07827+K04456+K07203+K03083+K00922+K02206+K02833+K04371+K10955+K09389+K06626+K04368+K04688+K06620+K08734	1862.44
ko05224	Human Diseases	Cancer: specific types	Breast cancer	http://www.genome.jp/kegg-bin/show_pathway?ko05224+K01110+K08957+K03099+K07827+K04456+K07203+K03083+K00922+K02833+K04371+K09389+K11256+K04368+K04688+K06620+K02091	1615.44
ko05225	Human Diseases	Cancer: specific types	Hepatocellular carcinoma	http://www.genome.jp/kegg-bin/show_pathway?ko05225+K01110+K08957+K03099+K00355+K07827+K04456+K07203+K00799+K03083+K00922+K02833+K04371+K09389+K05692+K11648+K11650+K11340+K22182+K01116+K04368+K04688+K11649+K06620+K11647+K02677+K23790+K10456+K02091	2210.89
ko05222	Human Diseases	Cancer: specific types	Small cell lung cancer	http://www.genome.jp/kegg-bin/show_pathway?ko05222+K01110+K04456+K06237+K00922+K09848+K02206+K13241+K09389+K02219+K04467+K06626+K03175+K05717+K08738+K06620+K01522+K10500+K03174+K03173+K02091	766.444
ko05223	Human Diseases	Cancer: specific types	Non-small cell lung cancer	http://www.genome.jp/kegg-bin/show_pathway?ko05223+K03099+K06276+K07827+K04456+K00922+K02833+K04371+K09389+K04411+K01116+K04368+K06620+K01522+K02677+K02091	763.667
ko05220	Human Diseases	Cancer: specific types	Chronic myeloid leukemia	http://www.genome.jp/kegg-bin/show_pathway?ko05220+K03099+K07827+K04456+K00922+K02833+K04371+K09389+K06067+K04467+K04368+K06620+K02091+K07293	612.889
ko05221	Human Diseases	Cancer: specific types	Acute myeloid leukemia	http://www.genome.jp/kegg-bin/show_pathway?ko05221+K06627+K03099+K07827+K04456+K07203+K00922+K02833+K04371+K04467+K04368+K04688+K21946	759.333
ko05418	Human Diseases	Cardiovascular disease	Fluid shear stress and atherosclerosis	http://www.genome.jp/kegg-bin/show_pathway?ko05418+K04079+K01940+K07198+K03671+K00355+K02183+K04430+K01365+K04456+K00799+K00922+K04427+K05692+K09487+K04464+K12160+K04467+K20607+K04392+K21278+K14381+K04426+K04431+K23790+K10456	14623.8
ko05414	Human Diseases	Cardiovascular disease	Dilated cardiomyopathy (DCM)	http://www.genome.jp/kegg-bin/show_pathway?ko05414+K04345+K12567+K05692+K12314+K09821+K04962+K05865+K17751+K04851+K04853+K05849+K05853	860.444
ko05410	Human Diseases	Cardiovascular disease	Hypertrophic cardiomyopathy (HCM)	http://www.genome.jp/kegg-bin/show_pathway?ko05410+K07198+K01283+K07199+K12567+K05692+K12314+K09821+K04962+K05865+K17751+K07200+K04851+K04853+K05849+K05853	1324.56
ko05412	Human Diseases	Cardiovascular disease	Arrhythmogenic right ventricular cardiomyopathy (ARVC)	http://www.genome.jp/kegg-bin/show_pathway?ko05412+K05692+K04962+K04851+K04853+K05849+K05853	184.111
ko05416	Human Diseases	Cardiovascular disease	Viral myocarditis	http://www.genome.jp/kegg-bin/show_pathway?ko05416+K03260+K05692+K04392+K08738+K17751	231.111
ko01503	Human Diseases	Drug resistance: antimicrobial	Cationic antimicrobial peptide (CAMP) resistance	http://www.genome.jp/kegg-bin/show_pathway?ko01503+K04771+K03367+K03585+K01448+K08589+K12340+K03760+K00677+K10012+K03739+K18138+K12962+K01364+K03767+K19226+K07640+K14188+K03740+K01406+K07806+K10011+K13014+K14205+K07264+K01399+K01401+K19078+K07662	26028.8
ko01502	Human Diseases	Drug resistance: antimicrobial	Vancomycin resistance	http://www.genome.jp/kegg-bin/show_pathway?ko01502+K01000+K01775+K08641+K01921+K07260+K01929+K02563+K18346+K18345+K18348+K18856+K18350+K18866+K18349+K01798+K18344+K15739+K18347	41289.4
ko01501	Human Diseases	Drug resistance: antimicrobial	beta-Lactam resistance	http://www.genome.jp/kegg-bin/show_pathway?ko01501+K05515+K05366+K15580+K12555+K17836+K03585+K01207+K03587+K08218+K15581+K10823+K15582+K12340+K15583+K12556+K17837+K18139+K18138+K02172+K18104+K02545+K02171+K12552+K01467+K03693+K17838+K12553+K18149+K18094	60330.6
ko01521	Human Diseases	Drug resistance: antineoplastic	EGFR tyrosine kinase inhibitor resistance	http://www.genome.jp/kegg-bin/show_pathway?ko01521+K01110+K03099+K07827+K04456+K02991+K07203+K03083+K00922+K03259+K02833+K04371+K04447+K01116+K04368+K04688+K02677	1634.22
ko01523	Human Diseases	Drug resistance: antineoplastic	Antifolate resistance	http://www.genome.jp/kegg-bin/show_pathway?ko01523+K00287+K00560+K00602+K00600+K00297+K05665+K05667+K05666+K05673+K04467+K05668	20010.4
ko01522	Human Diseases	Drug resistance: antineoplastic	Endocrine resistance	http://www.genome.jp/kegg-bin/show_pathway?ko01522+K04345+K03099+K07827+K04456+K07203+K00922+K02833+K04371+K09389+K11256+K05664+K04368+K04688+K06620	1361.11
ko01524	Human Diseases	Drug resistance: antineoplastic	Platinum drug resistance	http://www.genome.jp/kegg-bin/show_pathway?ko01524+K17686+K08737+K06276+K04456+K00799+K00922+K03164+K04371+K05666+K08735+K08738+K14686+K04426+K23790+K08734+K02350	2264.67
ko04950	Human Diseases	Endocrine and metabolic disease	Maturity onset diabetes of the young	http://www.genome.jp/kegg-bin/show_pathway?ko04950+K12407	3.88889
ko04940	Human Diseases	Endocrine and metabolic disease	Type I diabetes mellitus	http://www.genome.jp/kegg-bin/show_pathway?ko04940+K04077+K01580	5960
ko04931	Human Diseases	Endocrine and metabolic disease	Insulin resistance	http://www.genome.jp/kegg-bin/show_pathway?ko04931+K00688+K00820+K07198+K01596+K01110+K09667+K11533+K06276+K06269+K04456+K07203+K03083+K00922+K07199+K07201+K04373+K15719+K06068+K17605+K09821+K04688+K08746+K07200+K18050+K07293	19557
ko04934	Human Diseases	Endocrine and metabolic disease	Cushing syndrome	http://www.genome.jp/kegg-bin/show_pathway?ko04934+K11839+K01679+K04345+K03083+K02206+K04958+K04371+K09389+K14963+K05858+K04960+K06626+K04368+K09821+K04515+K04856+K06620+K04578+K12473+K09187+K14349+K04851+K04853+K02091+K18437	3071
ko04930	Human Diseases	Endocrine and metabolic disease	Type II diabetes mellitus	http://www.genome.jp/kegg-bin/show_pathway?ko04930+K00873+K00844+K07203+K00922+K04371+K06068+K05032+K12407+K18050+K04851	3846.22
ko04933	Human Diseases	Endocrine and metabolic disease	AGE-RAGE signaling pathway in diabetic complications	http://www.genome.jp/kegg-bin/show_pathway?ko04933+K07827+K04456+K06237+K00922+K02833+K07201+K04371+K03982+K05740+K06068+K05857+K04447+K05858+K01116+K09821+K06236+K04392+K05860+K05717+K02677+K18050+K21421	645
ko04932	Human Diseases	Endocrine and metabolic disease	Non-alcoholic fatty liver disease (NAFLD)	http://www.genome.jp/kegg-bin/show_pathway?ko04932+K07198+K00412+K04456+K03083+K00922+K07199+K03237+K07297+K02261+K03943+K04392+K02265+K08738+K00235+K04426+K03936+K02256+K00414+K02262+K07200+K08860+K03173	1885.89
ko05323	Human Diseases	Immune disease	Rheumatoid arthritis	http://www.genome.jp/kegg-bin/show_pathway?ko05323+K02154+K02145+K02155+K01365+K02150+K01394+K02146+K02151+K03661+K02144+K01371+K02149+K02147+K02148+K03662	906.778
ko05322	Human Diseases	Immune disease	Systemic lupus erythematosus	http://www.genome.jp/kegg-bin/show_pathway?ko05322+K11089+K11252+K11251+K11254+K11253+K03990+K04000+K11087+K11086	312.889
ko05321	Human Diseases	Immune disease	Inflammatory bowel disease (IBD)	http://www.genome.jp/kegg-bin/show_pathway?ko05321+K10165	5.66667
ko05340	Human Diseases	Immune disease	Primary immunodeficiency	http://www.genome.jp/kegg-bin/show_pathway?ko05340+K01488+K03648+K05856+K06478	3355.11
ko05134	Human Diseases	Infectious disease: bacterial	Legionellosis	http://www.genome.jp/kegg-bin/show_pathway?ko05134+K00239+K03596+K15475+K03231+K04077+K02406+K03283+K13525+K03233+K07874+K07875+K07937+K07953+K14416+K03990+K08517+K09414+K08738	18556.3
ko05135	Human Diseases	Infectious disease: bacterial	Yersinia infection	http://www.genome.jp/kegg-bin/show_pathway?ko05135+K17260+K04430+K04456+K03083+K00922+K00889+K04427+K13735+K05743+K18584+K04371+K05692+K04373+K04733+K04467+K01116+K04514+K04368+K03175+K05856+K04392+K05717+K04431+K17388+K12487+K03173+K23612+K23475+K05410+K04730	1500.67
ko05132	Human Diseases	Infectious disease: bacterial	Salmonella infection	http://www.genome.jp/kegg-bin/show_pathway?ko05132+K04079+K03671+K00134+K02406+K10416+K05757+K20182+K04430+K07889+K07897+K05756+K03221+K04456+K03094+K10413+K04427+K05733+K02833+K04371+K00914+K08847+K10420+K05759+K23934+K05692+K07834+K05755+K20181+K13085+K09487+K10414+K10418+K10415+K20179+K07829+K07887+K07888+K20180+K07937+K05758+K04733+K04467+K17092+K04368+K10419+K03175+K17923+K18441+K04392+K0789…	17169.4
ko05133	Human Diseases	Infectious disease: bacterial	Pertussis	http://www.genome.jp/kegg-bin/show_pathway?ko05133+K12340+K15125+K02183+K11004+K11003+K13241+K04371+K04001+K05765+K04733+K07679+K03990+K03175+K07690+K04730	6106.22
ko05130	Human Diseases	Infectious disease: bacterial	Pathogenic Escherichia coli infection	http://www.genome.jp/kegg-bin/show_pathway?ko05130+K00134+K05757+K07874+K07375+K05756+K03221+K10356+K04427+K05733+K04371+K05692+K14007+K05755+K07937+K05758+K04733+K04467+K11294+K04514+K03175+K10357+K18441+K20352+K04392+K08738+K02985+K12559+K07374+K17388+K04409+K01313+K10352+K03173+K23612+K07293+K04730	6311.33
ko05131	Human Diseases	Infectious disease: bacterial	Shigellosis	http://www.genome.jp/kegg-bin/show_pathway?ko05131+K00844+K02406+K05757+K16185+K05756+K08339+K03221+K04456+K07203+K17908+K03094+K03083+K06689+K10580+K00922+K03853+K04427+K05864+K08341+K04958+K07201+K04371+K00914+K05759+K16186+K05692+K04445+K05755+K11253+K12836+K13085+K05740+K06068+K05857+K07937+K05758+K04467+K05858+K04960+K01116+K04514+K08333+K03362+K03990+K10704+K04688+K03175+K03868+K04392+K0586…	4199.67
ko05100	Human Diseases	Infectious disease: bacterial	Bacterial invasion of epithelial cells	http://www.genome.jp/kegg-bin/show_pathway?ko05100+K13730+K04646+K05757+K13734+K05756+K00922+K13731+K13735+K05692+K05755+K13085+K05758+K04392+K05717+K23612	1953.22
ko05110	Human Diseases	Infectious disease: bacterial	Vibrio cholerae infection	http://www.genome.jp/kegg-bin/show_pathway?ko05110+K02154+K04345+K02145+K02155+K05692+K10956+K02150+K10949+K10950+K07937+K02146+K09582+K01116+K07342+K02151+K03661+K05031+K02144+K02677+K02149+K08604+K02147+K02148+K03662	1733.89
ko05150	Human Diseases	Infectious disease: bacterial	Staphylococcus aureus infection	http://www.genome.jp/kegg-bin/show_pathway?ko05150+K03367+K03739+K11041+K14201+K14192+K14194+K14188+K03740+K01315+K04004+K03905+K03990+K14205+K01401+K06496+K01333	1076
ko05152	Human Diseases	Infectious disease: bacterial	Tuberculosis	http://www.genome.jp/kegg-bin/show_pathway?ko05152+K04043+K02040+K04077+K02154+K02183+K07889+K07897+K02155+K06560+K04456+K13241+K04371+K00914+K07887+K07888+K04447+K06268+K04348+K04733+K02146+K01368+K08065+K03990+K06563+K03175+K03661+K04718+K13882+K02144+K08738+K04515+K01379+K14949+K06528+K10165+K08862+K10059+K03662+K04730	18814.8
ko05120	Human Diseases	Infectious disease: bacterial	Epithelial cell signaling in Helicobacter pylori infection	http://www.genome.jp/kegg-bin/show_pathway?ko05120+K08303+K02154+K02145+K04430+K01428+K02155+K02150+K03196+K02146+K04467+K01116+K02151+K03661+K04392+K02144+K04409+K02149+K14048+K02147+K03191+K02148+K03662+K07293	15351
ko05143	Human Diseases	Infectious disease: parasitic	African trypanosomiasis	http://www.genome.jp/kegg-bin/show_pathway?ko05143+K01354+K01404+K14475+K05858+K01392+K02677	512.667
ko05142	Human Diseases	Infectious disease: parasitic	Chagas disease (American trypanosomiasis)	http://www.genome.jp/kegg-bin/show_pathway?ko05142+K01354+K04430+K01283+K04456+K00922+K13241+K04371+K03982+K04354+K04733+K03456+K04382+K04467+K05858+K03990+K03175+K08057+K04730	1170.11
ko05140	Human Diseases	Infectious disease: parasitic	Leishmaniasis	http://www.genome.jp/kegg-bin/show_pathway?ko05140+K03231+K01404+K04427+K13241+K04371+K04447+K04733+K03990+K03175+K21421+K04730	572.667
ko05146	Human Diseases	Infectious disease: parasitic	Amoebiasis	http://www.genome.jp/kegg-bin/show_pathway?ko05146+K04072+K13963+K04345+K01476+K07889+K07897+K06237+K13279+K00922+K13241+K10955+K07887+K07888+K05858+K06236+K07898+K05717+K02677+K04000	3552.22
ko05145	Human Diseases	Infectious disease: parasitic	Toxoplasmosis	http://www.genome.jp/kegg-bin/show_pathway?ko05145+K13412+K03283+K06276+K04456+K04427+K13241+K04371+K21289+K04447+K04733+K04467+K03175+K08738+K09565+K12473+K04730	4969.67
ko05144	Human Diseases	Infectious disease: parasitic	Malaria	http://www.genome.jp/kegg-bin/show_pathway?ko05144+K04659+K04550+K06496	28
ko05170	Human Diseases	Infectious disease: viral	Human immunodeficiency virus 1 infection	http://www.genome.jp/kegg-bin/show_pathway?ko05170+K02183+K12391+K05868+K06640+K07827+K04456+K07203+K12394+K03094+K00922+K04427+K05733+K05743+K02833+K04958+K04371+K02087+K12393+K05765+K22544+K06268+K04348+K10610+K04733+K10609+K12392+K04467+K21771+K04960+K01116+K04368+K08056+K03362+K04688+K03175+K03868+K02216+K04392+K21770+K08738+K08057+K04431+K03347+K04409+K02677+K04536+K03173+K05410+K05734+K04730	2445.33
ko05165	Human Diseases	Infectious disease: viral	Human papillomavirus infection	http://www.genome.jp/kegg-bin/show_pathway?ko05165+K00873+K01110+K06627+K02154+K08957+K04345+K03099+K02145+K06640+K02155+K07827+K06238+K04456+K12236+K07203+K06237+K11583+K03083+K00922+K07208+K02206+K03120+K02833+K07201+K04371+K02150+K04354+K06067+K02146+K03456+K04382+K10587+K04467+K06069+K06626+K02151+K04368+K04688+K03661+K06236+K05717+K11584+K02144+K04659+K16195+K10389+K02149+K03174+K14754+K0214…	6843.11
ko05164	Human Diseases	Infectious disease: viral	Influenza A	http://www.genome.jp/kegg-bin/show_pathway?ko05164+K14290+K07904+K04456+K07905+K00922+K05863+K14297+K04371+K05692+K03237+K15042+K04447+K01315+K04733+K04467+K09507+K04368+K01312+K14298+K15045+K08738+K14404+K14396+K16195+K12647+K02677+K03174+K14754+K05401+K09523+K05410+K02091	1649.11
ko05167	Human Diseases	Infectious disease: viral	Kaposi sarcoma-associated herpesvirus infection	http://www.genome.jp/kegg-bin/show_pathway?ko05167+K08343+K02183+K04430+K07827+K04456+K07203+K03083+K00922+K08341+K02833+K04958+K04371+K00914+K09389+K21289+K04447+K06268+K04348+K04467+K04960+K01116+K04368+K03990+K04392+K08738+K06620+K04431+K16195+K04551+K03174+K15308+K04536+K03173+K05401+K05410+K08334+K02091	1906.33
ko05166	Human Diseases	Infectious disease: viral	Human T-cell leukemia virus 1 infection	http://www.genome.jp/kegg-bin/show_pathway?ko05166+K01110+K04421+K05770+K15305+K06627+K14290+K04345+K04430+K06640+K03363+K07827+K15040+K04456+K03355+K00922+K02206+K03120+K05863+K02833+K04371+K09389+K06641+K06268+K04348+K03348+K15306+K07936+K04467+K06626+K08065+K04368+K03353+K02216+K05856+K03357+K21770+K06062+K03350+K08057+K06620+K03349+K11304+K15308+K03358	2426.89
ko05161	Human Diseases	Infectious disease: viral	Hepatitis B	http://www.genome.jp/kegg-bin/show_pathway?ko05161+K06627+K03099+K16197+K04430+K07827+K04456+K04802+K00922+K02206+K04427+K11594+K02833+K04371+K09389+K04447+K10610+K04733+K04467+K06626+K04368+K03175+K08738+K06255+K06620+K04431+K12647+K02677+K03174+K05401+K05410+K03662+K04730	1013.44
ko05160	Human Diseases	Infectious disease: viral	Hepatitis C	http://www.genome.jp/kegg-bin/show_pathway?ko05160+K16196+K03099+K16197+K07827+K06630+K04456+K03083+K00922+K02206+K02833+K04371+K09389+K03237+K04354+K16198+K03456+K04382+K04467+K04368+K03175+K15045+K08738+K06620+K16195+K03250+K12473+K03174+K08860+K14754+K03173+K16194+K05401+K05410+K02091	1933
ko05163	Human Diseases	Infectious disease: viral	Human cytomegalovirus infection	http://www.genome.jp/kegg-bin/show_pathway?ko05163+K04345+K03099+K02183+K07827+K04456+K07203+K03083+K00922+K07208+K02833+K04958+K04371+K09389+K06268+K04348+K04467+K05858+K04960+K04514+K04368+K08056+K04688+K04392+K08738+K08057+K06620+K17388+K02677+K04536+K03173+K05410+K02091	2350
ko05162	Human Diseases	Infectious disease: viral	Measles	http://www.genome.jp/kegg-bin/show_pathway?ko05162+K16196+K03283+K04456+K03083+K00922+K02206+K04427+K14753+K03115+K03237+K04733+K03097+K04467+K06626+K06563+K03175+K08738+K16195+K12647+K07899+K03174+K08860+K14754+K16194+K05410+K02091+K04730	1796.22
ko05169	Human Diseases	Infectious disease: viral	Epstein-Barr virus infection	http://www.genome.jp/kegg-bin/show_pathway?ko05169+K03029+K06627+K03028+K10591+K04430+K03032+K04456+K03030+K00922+K03066+K02206+K04427+K03064+K03061+K03031+K03038+K09389+K03036+K06067+K11838+K03033+K11644+K04733+K03039+K04467+K06626+K03037+K08056+K06063+K03175+K06468+K04392+K03063+K08738+K03065+K08057+K06620+K04431+K03035+K16195+K06691+K03174+K03173+K03062+K05410+K02091+K04730	1095.67
ko05168	Human Diseases	Infectious disease: viral	Herpes simplex virus 1 infection	http://www.genome.jp/kegg-bin/show_pathway?ko05168+K16196+K03241+K12893+K06269+K04456+K07203+K09228+K00922+K03680+K07208+K04427+K02308+K15409+K03237+K12891+K12881+K04447+K04733+K04467+K03754+K08056+K03990+K03175+K03239+K03240+K08738+K08057+K16195+K12647+K03174+K08860+K12896+K14966+K03173+K16194+K05401+K05410+K07293+K04730	1593.33
ko05020	Human Diseases	Neurodegenerative disease	Prion diseases	http://www.genome.jp/kegg-bin/show_pathway?ko05020+K04345+K09553+K04371+K09490+K04368+K05634+K04565+K04000	1072.56
ko05010	Human Diseases	Neurodegenerative disease	Alzheimer disease	http://www.genome.jp/kegg-bin/show_pathway?ko05010+K00134+K04524+K08957+K02183+K00412+K07375+K02132+K21357+K07827+K15040+K08269+K04456+K07203+K17908+K08960+K03083+K02128+K00922+K03853+K05864+K02133+K03115+K05863+K02833+K13241+K04958+K04371+K03878+K10396+K00914+K01408+K03884+K03237+K03879+K02090+K02261+K06268+K03883+K03943+K04348+K03097+K04467+K05858+K04532+K04960+K08333+K04368+K02265+K08738+K0023…	7940.56
ko05012	Human Diseases	Neurodegenerative disease	Parkinson disease	http://www.genome.jp/kegg-bin/show_pathway?ko05012+K04345+K00412+K10575+K02132+K15040+K03178+K02128+K02133+K05863+K03878+K08844+K03884+K04556+K10698+K03879+K02261+K03883+K03943+K10578+K02265+K08738+K00235+K03936+K09565+K02256+K04551+K00414+K02262+K08669+K02138+K02127+K02126+K05687	1346.11
ko05017	Human Diseases	Neurodegenerative disease	Spinocerebellar ataxia	http://www.genome.jp/kegg-bin/show_pathway?ko05017+K17943+K17680+K03124+K21357+K08269+K04456+K07203+K17908+K00922+K14564+K03120+K04958+K00914+K05858+K04960+K08333+K08956+K11863+K04426+K11304+K02677+K03173+K04961+K08334+K05853	2189.78
ko05014	Human Diseases	Neurodegenerative disease	Amyotrophic lateral sclerosis (ALS)	http://www.genome.jp/kegg-bin/show_pathway?ko05014+K00432+K02308+K03781+K07887+K06268+K04348+K04392+K08738+K04426+K04575+K04565	5644.89
ko05016	Human Diseases	Neurodegenerative disease	Huntington disease	http://www.genome.jp/kegg-bin/show_pathway?ko05016+K00432+K04564+K04646+K10408+K00412+K07375+K02132+K03006+K21357+K15040+K08269+K04638+K07203+K17908+K10411+K10410+K02128+K16575+K02133+K03120+K03010+K05863+K04958+K03013+K03878+K10396+K00914+K03884+K03879+K06067+K02261+K03016+K11143+K03883+K03943+K03011+K11644+K03017+K11827+K05858+K03008+K08333+K10426+K04560+K11824+K03014+K11826+K02265+K08738+K0023…	10997.6
ko05034	Human Diseases	Substance dependence	Alcoholism	http://www.genome.jp/kegg-bin/show_pathway?ko05034+K11407+K07359+K04345+K03099+K02183+K11252+K06269+K07827+K02833+K04371+K11251+K11254+K11253+K06067+K04368+K05869+K00908+K15014+K04536+K00274	2426.56
ko05033	Human Diseases	Substance dependence	Nicotine addiction	http://www.genome.jp/kegg-bin/show_pathway?ko05033+K05185	31.4444
ko05032	Human Diseases	Substance dependence	Morphine addiction	http://www.genome.jp/kegg-bin/show_pathway?ko05032+K13755+K04345+K13293+K02677+K05185+K04536+K18437	955.778
ko05031	Human Diseases	Substance dependence	Amphetamine addiction	http://www.genome.jp/kegg-bin/show_pathway?ko05031+K04345+K02183+K06269+K06067+K06268+K04348+K04560+K05869+K04515+K02677+K04851+K00274+K11411	1848.22
ko05030	Human Diseases	Substance dependence	Cocaine addiction	http://www.genome.jp/kegg-bin/show_pathway?ko05030+K04345+K02090+K00274	604.444
ko00300	Metabolism	Amino acid metabolism	Lysine biosynthesis	http://www.genome.jp/kegg-bin/show_pathway?ko00300+K00928+K01714+K12524+K01778+K01928+K00215+K10206+K03340+K01586+K01439+K00821+K01929+K00003+K00290+K00133+K05825+K00674+K00841+K16180+K10978+K14267+K15792+K05822+K05831+K10977+K01798+K05823+K16792+K16182+K16181+K16793+K05828+K05827+K12526+K05829	70596.1
ko00260	Metabolism	Amino acid metabolism	Glycine, serine and threonine metabolism	http://www.genome.jp/kegg-bin/show_pathway?ko00260+K15633+K00605+K01733+K00928+K01752+K12524+K00639+K00283+K00058+K01696+K00865+K00382+K01079+K01754+K00282+K01834+K11529+K06001+K01620+K17103+K00003+K00600+K01695+K00018+K00831+K01753+K00133+K00303+K15635+K02203+K00302+K02204+K15634+K22305+K00281+K02437+K00060+K00872+K00836+K01697+K00130+K13745+K18897+K11440+K01758+K00301+K00830+K00049+K15783+K0054…	98564.2
ko00340	Metabolism	Amino acid metabolism	Histidine metabolism	http://www.genome.jp/kegg-bin/show_pathway?ko00340+K02501+K04486+K01745+K17363+K13990+K00013+K00817+K01814+K11755+K02502+K00128+K00765+K01468+K02500+K01712+K01693+K01089+K00603+K01496+K01458+K01590+K01523+K19787+K05602+K24017+K01479+K18912+K14152+K01663+K00274	45995.8
ko00330	Metabolism	Amino acid metabolism	Arginine and proline metabolism	http://www.genome.jp/kegg-bin/show_pathway?ko00330+K01480+K00147+K00294+K01259+K01585+K01470+K00286+K00812+K00819+K00931+K00657+K00128+K23121+K01581+K01485+K11358+K00824+K03365+K10536+K13747+K12251+K09472+K01476+K01473+K09251+K01474+K00797+K01426+K21672+K01750+K10793+K01777+K13821+K03343+K01611+K02626+K13241+K01584+K10794+K00934+K00542+K06447+K00273+K18123+K21062+K09471+K00318+K09123+K14455+K0013…	40797.3
ko00270	Metabolism	Amino acid metabolism	Cysteine and methionine metabolism	http://www.genome.jp/kegg-bin/show_pathway?ko00270+K00826+K00548+K01740+K00558+K00928+K00651+K14155+K01752+K12524+K00640+K00641+K00058+K00789+K24042+K12960+K00812+K08968+K01243+K00016+K00772+K01919+K00003+K01251+K00024+K00831+K00899+K00133+K11358+K01738+K00547+K05396+K23977+K08963+K00549+K00832+K01739+K01760+K01761+K07173+K00797+K17950+K17398+K01505+K01011+K01697+K00025+K18284+K17462+K01611+K0975…	120062
ko00290	Metabolism	Amino acid metabolism	Valine, leucine and isoleucine biosynthesis	http://www.genome.jp/kegg-bin/show_pathway?ko00290+K00826+K01687+K00052+K01652+K01649+K01754+K00053+K09011+K01704+K14260+K01703+K00263+K01653+K01702	33181.9
ko00220	Metabolism	Amino acid metabolism	Arginine biosynthesis	http://www.genome.jp/kegg-bin/show_pathway?ko00220+K01755+K01915+K00926+K01478+K00262+K00620+K01940+K00611+K00145+K00812+K00821+K01438+K00930+K11358+K14260+K23265+K01425+K01476+K22477+K14682+K15371+K01428+K00619+K00260+K05831+K00261+K14681+K13241+K22476+K09065+K01427+K00818+K01948+K00814+K01941+K05828+K14455+K14048+K05829+K01429+K01430	60399.1
ko00360	Metabolism	Amino acid metabolism	Phenylalanine metabolism	http://www.genome.jp/kegg-bin/show_pathway?ko00360+K00817+K00812+K01912+K01666+K02614+K10797+K11358+K00074+K00824+K00832+K03782+K02613+K15866+K01426+K00055+K01692+K01451+K00529+K04073+K00457+K02554+K18363+K05714+K00146+K18359+K14455+K18356+K02609+K05711+K00274+K10775+K02618	24785.2
ko00400	Metabolism	Amino acid metabolism	Phenylalanine, tyrosine and tryptophan biosynthesis	http://www.genome.jp/kegg-bin/show_pathway?ko00400+K01736+K04093+K04517+K03785+K01657+K01735+K01696+K00014+K00800+K00817+K00891+K00812+K04516+K14170+K03856+K06001+K01626+K01713+K06209+K01695+K00766+K01817+K04518+K01658+K01609+K11358+K03786+K15652+K00832+K13832+K13829+K13497+K13498+K16306+K11646+K24018+K05887+K24017+K13830+K14187+K17749+K14455+K06208	74227
ko00280	Metabolism	Amino acid metabolism	Valine, leucine and isoleucine degradation	http://www.genome.jp/kegg-bin/show_pathway?ko00280+K00826+K05606+K01847+K00140+K00186+K00382+K00626+K01641+K00128+K01968+K11381+K11263+K00632+K00263+K00188+K01966+K01028+K13766+K01969+K07250+K00020+K01692+K01907+K19312+K00248+K00187+K00022+K01640+K07513+K00249+K01825+K00822+K01848+K00253+K01782+K01849+K01029+K11410+K18660+K18661+K01965+K18472+K09478+K11538+K15036+K08683+K00167+K07508	23319.3
ko00250	Metabolism	Amino acid metabolism	Alanine, aspartate and glutamate metabolism	http://www.genome.jp/kegg-bin/show_pathway?ko00250+K00764+K01755+K01955+K00820+K01953+K01915+K00265+K00294+K01424+K00262+K01756+K00609+K01939+K01940+K01779+K00266+K01914+K00812+K01956+K00610+K00278+K19244+K01744+K11358+K14260+K23265+K13566+K00135+K01425+K00259+K00823+K07250+K15371+K00260+K13821+K00261+K14681+K09758+K00608+K11540+K00830+K01580+K01948+K00814+K01954+K00264+K18310+K14455+K11541+K13051	126690
ko00310	Metabolism	Amino acid metabolism	Lysine degradation	http://www.genome.jp/kegg-bin/show_pathway?ko00310+K01034+K00382+K00626+K00290+K00128+K01843+K00824+K01844+K18012+K00135+K18013+K01582+K18011+K18014+K01035+K09251+K07250+K21672+K01692+K00658+K00022+K01506+K01825+K01782+K00252+K22748+K11430+K11421+K15588+K00137+K09187+K13609+K11426+K14959+K11431	17805.7
ko00380	Metabolism	Amino acid metabolism	Tryptophan metabolism	http://www.genome.jp/kegg-bin/show_pathway?ko00380+K01667+K07130+K00382+K00626+K00128+K03782+K01501+K01426+K01692+K00658+K00022+K01825+K23384+K03781+K01782+K00252+K10217+K01556+K03392+K22450+K01432+K00274	10967.2
ko00350	Metabolism	Amino acid metabolism	Tyrosine metabolism	http://www.genome.jp/kegg-bin/show_pathway?ko00350+K00817+K04072+K00812+K00001+K02510+K11358+K13954+K00135+K00832+K00055+K01668+K13953+K18933+K00457+K16164+K00121+K01557+K05921+K02509+K14455+K13951+K00450+K00451+K16165+K00274	15377.9
ko00261	Metabolism	Biosynthesis of other secondary metabolites	Monobactam biosynthesis	http://www.genome.jp/kegg-bin/show_pathway?ko00261+K00956+K00928+K01714+K12524+K00215+K00133+K00957+K00955+K00958+K12526+K16422	25572.4
ko00941	Metabolism	Biosynthesis of other secondary metabolites	Flavonoid biosynthesis	http://www.genome.jp/kegg-bin/show_pathway?ko00941+K01859	1.88889
ko00943	Metabolism	Biosynthesis of other secondary metabolites	Isoflavonoid biosynthesis	http://www.genome.jp/kegg-bin/show_pathway?ko00943+K05281	0.444444
ko00333	Metabolism	Biosynthesis of other secondary metabolites	Prodigiosin biosynthesis	http://www.genome.jp/kegg-bin/show_pathway?ko00333+K00059+K00645+K00208	10959.7
ko00332	Metabolism	Biosynthesis of other secondary metabolites	Carbapenem biosynthesis	http://www.genome.jp/kegg-bin/show_pathway?ko00332+K00147+K00931	6737.33
ko00998	Metabolism	Biosynthesis of other secondary metabolites	Biosynthesis of various secondary metabolites - part 2	http://www.genome.jp/kegg-bin/show_pathway?ko00998+K09459+K02078+K01841+K23999+K19548	4740.22
ko00997	Metabolism	Biosynthesis of other secondary metabolites	Biosynthesis of various secondary metabolites - part 3	http://www.genome.jp/kegg-bin/show_pathway?ko00997+K21898+K21721+K23373+K21949	831.333
ko00940	Metabolism	Biosynthesis of other secondary metabolites	Phenylpropanoid biosynthesis	http://www.genome.jp/kegg-bin/show_pathway?ko00940+K05349+K03186+K05350+K03782+K01188+K10775+K00430	52822.3
ko00944	Metabolism	Biosynthesis of other secondary metabolites	Flavone and flavonol biosynthesis	http://www.genome.jp/kegg-bin/show_pathway?ko00944+K01195	2000.56
ko00401	Metabolism	Biosynthesis of other secondary metabolites	Novobiocin biosynthesis	http://www.genome.jp/kegg-bin/show_pathway?ko00401+K04517+K00817+K00812+K11358+K00832+K24018+K14187	15175.3
ko00405	Metabolism	Biosynthesis of other secondary metabolites	Phenazine biosynthesis	http://www.genome.jp/kegg-bin/show_pathway?ko00405+K01657+K01658+K06998+K20257	3814.44
ko00960	Metabolism	Biosynthesis of other secondary metabolites	Tropane, piperidine and pyridine alkaloid biosynthesis	http://www.genome.jp/kegg-bin/show_pathway?ko00960+K00817+K00812+K11358+K00832+K01582+K19064+K00808+K13607+K14455+K13609+K08081	12659.2
ko00966	Metabolism	Biosynthesis of other secondary metabolites	Glucosinolate biosynthesis	http://www.genome.jp/kegg-bin/show_pathway?ko00966+K00826+K01703	7468.67
ko00965	Metabolism	Biosynthesis of other secondary metabolites	Betalain biosynthesis	http://www.genome.jp/kegg-bin/show_pathway?ko00965+K15777	2.11111
ko00254	Metabolism	Biosynthesis of other secondary metabolites	Aflatoxin biosynthesis	http://www.genome.jp/kegg-bin/show_pathway?ko00254+K17648	2.88889
ko00311	Metabolism	Biosynthesis of other secondary metabolites	Penicillin and cephalosporin biosynthesis	http://www.genome.jp/kegg-bin/show_pathway?ko00311+K17836+K01060+K04127+K19200+K01434+K00273+K12743+K24041	2229.11
ko00950	Metabolism	Biosynthesis of other secondary metabolites	Isoquinoline alkaloid biosynthesis	http://www.genome.jp/kegg-bin/show_pathway?ko00950+K00812+K11358+K00832+K14455+K00274	7759.33
ko00521	Metabolism	Biosynthesis of other secondary metabolites	Streptomycin biosynthesis	http://www.genome.jp/kegg-bin/show_pathway?ko00521+K00067+K01835+K00973+K00844+K00010+K01092+K00845+K01710+K01790+K01858+K23144+K15778+K23987+K12407	37595.3
ko00524	Metabolism	Biosynthesis of other secondary metabolites	Neomycin, kanamycin and gentamicin biosynthesis	http://www.genome.jp/kegg-bin/show_pathway?ko00524+K00844+K00845+K12407	9154.33
ko00525	Metabolism	Biosynthesis of other secondary metabolites	Acarbose and validamycin biosynthesis	http://www.genome.jp/kegg-bin/show_pathway?ko00525+K00973+K01710+K23144+K19978+K19974	8945.33
ko00010	Metabolism	Carbohydrate metabolism	Glycolysis / Gluconeogenesis	http://www.genome.jp/kegg-bin/show_pathway?ko00010+K15633+K00873+K01689+K03737+K01835+K00927+K00174+K01792+K01610+K00844+K01810+K00175+K01624+K01895+K01785+K00170+K00382+K04072+K01222+K21071+K00016+K01834+K00845+K04041+K01803+K00134+K20866+K01223+K00128+K01085+K00850+K01596+K00001+K00895+K00627+K15635+K13954+K01905+K00002+K02791+K00172+K16370+K00169+K15634+K11645+K00171+K02446+K01623+K00886+K0277…	131273
ko00630	Metabolism	Carbohydrate metabolism	Glyoxylate and dicarboxylate metabolism	http://www.genome.jp/kegg-bin/show_pathway?ko00630+K00605+K01915+K01091+K05606+K01433+K00283+K00865+K01681+K01847+K03779+K01625+K00104+K07130+K01895+K00382+K00123+K00626+K00282+K01647+K11529+K00024+K00600+K00018+K00048+K07248+K11263+K01455+K19269+K03780+K00015+K01966+K00281+K02437+K19268+K07246+K01816+K19312+K01458+K17865+K00127+K00124+K00042+K01601+K01637+K00025+K04835+K01848+K22223+K00023+K0184…	79561.2
ko00640	Metabolism	Carbohydrate metabolism	Propanoate metabolism	http://www.genome.jp/kegg-bin/show_pathway?ko00640+K00656+K01034+K00925+K05606+K15024+K01847+K23259+K01962+K01895+K00170+K00140+K00382+K23257+K00626+K00016+K11264+K01026+K00625+K00048+K00005+K11381+K01963+K01905+K11263+K01961+K01903+K00172+K18471+K01902+K00169+K01966+K00823+K01035+K00232+K13922+K07250+K02160+K00171+K01692+K09788+K17489+K19312+K01734+K00248+K01699+K13921+K24012+K01720+K13788+K0182…	42598
ko00020	Metabolism	Carbohydrate metabolism	Citrate cycle (TCA cycle)	http://www.genome.jp/kegg-bin/show_pathway?ko00020+K05942+K00239+K03737+K00177+K00174+K01610+K00241+K00175+K01681+K00244+K00170+K00382+K01647+K00024+K01678+K01960+K00031+K01596+K00030+K01677+K00176+K01679+K00627+K01958+K01676+K01903+K00172+K01902+K18118+K00169+K00171+K00240+K00116+K00658+K01959+K00162+K00025+K00163+K00161+K00245+K01682+K00235+K00164+K01900	74399.1
ko00500	Metabolism	Carbohydrate metabolism	Starch and sucrose metabolism	http://www.genome.jp/kegg-bin/show_pathway?ko00500+K00705+K00688+K00703+K00700+K05349+K01187+K01176+K21574+K01835+K01838+K00975+K00844+K01810+K01179+K00702+K00847+K01226+K01222+K05343+K01208+K00845+K07405+K01193+K00978+K01223+K05988+K05341+K01200+K05342+K01214+K01182+K05350+K02810+K02791+K16055+K01212+K16153+K00963+K01232+K16149+K00691+K02761+K01210+K01194+K02777+K01236+K00690+K15778+K00694+K0685…	188566
ko00650	Metabolism	Carbohydrate metabolism	Butanoate metabolism	http://www.genome.jp/kegg-bin/show_pathway?ko00650+K00656+K01034+K00239+K01652+K00929+K03737+K00100+K00174+K00241+K00175+K00244+K00170+K00634+K04072+K00626+K01575+K20509+K01641+K23352+K18122+K18120+K14534+K00074+K23351+K18119+K00135+K00209+K00172+K01653+K18118+K00169+K01615+K00823+K01035+K01028+K07516+K01715+K07250+K00171+K00240+K00132+K01692+K07246+K01907+K18009+K17865+K00248+K00022+K17829+K0164…	70066.4
ko00030	Metabolism	Carbohydrate metabolism	Pentose phosphate pathway	http://www.genome.jp/kegg-bin/show_pathway?ko00030+K00615+K03738+K01808+K01839+K01835+K01619+K01810+K01624+K01625+K00948+K21071+K00874+K11529+K01783+K00852+K04041+K01621+K07404+K00850+K01053+K00895+K01807+K08093+K00033+K08094+K00034+K13812+K16370+K00851+K00616+K11645+K02446+K01623+K15778+K00036+K16306+K06859+K13810+K01057+K01622+K03841+K13831+K17465+K17466+K17468+K00090+K00918+K17467+K00131+K1746…	77469.8
ko00040	Metabolism	Carbohydrate metabolism	Pentose and glucuronate interconversions	http://www.genome.jp/kegg-bin/show_pathway?ko00040+K01812+K01685+K00854+K00040+K00008+K01051+K22994+K00041+K00012+K22933+K00848+K01783+K01804+K01629+K01805+K03077+K00011+K01686+K01815+K05352+K16850+K01195+K01730+K09988+K03079+K21619+K00002+K21030+K08092+K00853+K00963+K14274+K01728+K21681+K00880+K00065+K22935+K22397+K08323+K16849+K14273+K22539+K08322+K12447+K00699+K16190+K01820+K22185+K17818+K0007…	60895.9
ko00660	Metabolism	Carbohydrate metabolism	C5-Branched dibasic acid metabolism	http://www.genome.jp/kegg-bin/show_pathway?ko00660+K10218+K00052+K01652+K01575+K09011+K01704+K01703+K18288+K01903+K01653+K01902+K19268+K04835+K01846	18750.6
ko00562	Metabolism	Carbohydrate metabolism	Inositol phosphate metabolism	http://www.genome.jp/kegg-bin/show_pathway?ko00562+K00140+K00010+K03336+K01092+K01803+K03335+K22230+K01110+K03337+K01771+K16044+K01858+K03339+K03338+K21797+K18083+K20279+K19801+K00922+K00889+K22232+K00914+K18081+K21798+K16043+K06606+K00921+K00888+K21289+K22233+K05857+K05858+K01108+K01116+K01106+K03084+K22913+K00999+K20278+K05860+K01099+K00920+K01114+K15909+K18082+K00923+K05861+K10047+K07281	13342.3
ko00620	Metabolism	Carbohydrate metabolism	Pyruvate metabolism	http://www.genome.jp/kegg-bin/show_pathway?ko00620+K00656+K00873+K00925+K01571+K01649+K03778+K03737+K01069+K00027+K15024+K00174+K01610+K00175+K00244+K01962+K01895+K01759+K00170+K00382+K04072+K01006+K23257+K00626+K00016+K01026+K20509+K00024+K00102+K01678+K01960+K00128+K01596+K00625+K01677+K22373+K01679+K00627+K01958+K07248+K01963+K01905+K01676+K11263+K00029+K01961+K00172+K01512+K18118+K00169+K0100…	114108
ko00520	Metabolism	Carbohydrate metabolism	Amino sugar and nucleotide sugar metabolism	http://www.genome.jp/kegg-bin/show_pathway?ko00520+K12373+K02377+K00820+K03431+K02474+K01784+K00849+K01198+K01835+K00975+K00966+K01183+K01711+K01809+K01209+K00971+K01840+K01791+K00844+K00075+K01810+K02564+K13018+K00847+K01207+K01854+K00012+K13016+K07106+K01443+K00845+K00790+K00965+K00978+K17716+K18675+K01788+K16881+K02793+K08679+K12452+K08678+K00992+K13020+K18677+K13017+K01654+K01709+K02472+K0163…	164457
ko00052	Metabolism	Carbohydrate metabolism	Galactose metabolism	http://www.genome.jp/kegg-bin/show_pathway?ko00052+K07407+K01187+K01190+K01784+K00849+K01835+K00844+K01785+K01854+K21071+K00845+K00965+K01193+K00917+K01182+K07406+K00850+K17716+K12308+K00011+K02775+K16371+K02773+K16370+K01684+K08302+K00963+K21621+K15778+K12111+K04618+K12316+K12447+K01220+K02788+K02744+K02774+K01631+K06617+K12047+K10984+K00883+K10986+K01229+K01819+K10985+K01203+K01635+K12407+K0278…	123948
ko00053	Metabolism	Carbohydrate metabolism	Ascorbate and aldarate metabolism	http://www.genome.jp/kegg-bin/show_pathway?ko00053+K00012+K03475+K00128+K23004+K03077+K01053+K01708+K03079+K08092+K23003+K23005+K00880+K03476+K01706+K02821+K18983+K01630+K13875+K12447+K02822+K13876+K00699+K16190+K20023+K00064+K23007+K13874+K14190+K10047+K18981+K03078	15740.7
ko00051	Metabolism	Carbohydrate metabolism	Fructose and mannose metabolism	http://www.genome.jp/kegg-bin/show_pathway?ko00051+K01808+K02377+K01218+K00966+K03332+K01711+K01809+K00971+K01840+K00844+K00008+K01624+K00882+K00847+K02782+K02770+K21071+K00009+K00848+K04041+K01803+K01629+K01813+K01628+K00850+K02800+K01805+K00011+K16881+K02793+K00895+K02768+K19956+K01818+K02798+K00068+K19355+K02794+K02783+K16370+K01729+K05305+K11645+K00881+K02446+K00863+K15856+K01623+K07046+K1601…	82624.4
ko00720	Metabolism	Energy metabolism	Carbon fixation pathways in prokaryotes	http://www.genome.jp/kegg-bin/show_pathway?ko00720+K00925+K00239+K03737+K01938+K05606+K00177+K15024+K00174+K00241+K00175+K01681+K01847+K00244+K01962+K01895+K00170+K01006+K00626+K05299+K01491+K00024+K01678+K01960+K15016+K00031+K15022+K14534+K14138+K00625+K00297+K01677+K00176+K01679+K01958+K00198+K01963+K01676+K18209+K01961+K18210+K01903+K00197+K00172+K00196+K01902+K00169+K00194+K01007+K02160+K0017…	104658
ko00680	Metabolism	Energy metabolism	Methane metabolism	http://www.genome.jp/kegg-bin/show_pathway?ko00680+K00400+K15633+K11212+K00925+K01689+K00058+K01624+K01895+K00170+K07812+K00123+K00319+K06034+K21071+K01079+K01834+K03388+K11529+K05299+K04041+K05884+K00024+K00600+K00018+K00831+K05979+K00850+K15022+K00202+K00625+K14941+K14080+K15635+K14084+K00198+K08093+K00399+K08094+K07144+K14083+K12234+K03389+K00579+K16178+K00577+K02203+K13812+K00581+K00197+K0058…	82748.1
ko00920	Metabolism	Energy metabolism	Sulfur metabolism	http://www.genome.jp/kegg-bin/show_pathway?ko00920+K00956+K00651+K00640+K00641+K07306+K15555+K07307+K00860+K00385+K00390+K06881+K15552+K01738+K16951+K21308+K20035+K00957+K02047+K01739+K00184+K00955+K15554+K00394+K02046+K00958+K01082+K02045+K00380+K15551+K15553+K00392+K23163+K07308+K08352+K16950+K17218+K00395+K01011+K00185+K16937+K04091+K11181+K10831+K08357+K17069+K10764+K20034+K17228+K11180+K1722…	26131.8
ko00196	Metabolism	Energy metabolism	Photosynthesis - antenna proteins	http://www.genome.jp/kegg-bin/show_pathway?ko00196+K02285+K08912	6
ko00195	Metabolism	Energy metabolism	Photosynthesis	http://www.genome.jp/kegg-bin/show_pathway?ko00195+K02110+K02115+K02109+K02112+K02111+K02108+K02113+K02114+K02690+K02709+K02634+K02689+K02704+K02635+K02706+K02705+K02691+K02703	26661.8
ko00190	Metabolism	Energy metabolism	Oxidative phosphorylation	http://www.genome.jp/kegg-bin/show_pathway?ko00190+K15986+K00239+K02123+K00937+K02110+K02115+K00241+K13378+K00331+K00425+K00244+K02118+K02109+K02112+K02117+K02111+K00336+K00335+K01507+K02124+K00426+K03890+K02119+K02108+K00341+K00339+K00337+K02113+K00340+K00343+K02121+K02114+K02154+K00338+K00333+K00342+K02122+K02120+K06019+K00334+K00332+K02145+K00240+K00412+K03885+K02132+K05580+K02155+K22468+K0212…	77104.4
ko00710	Metabolism	Energy metabolism	Carbon fixation in photosynthetic organisms	http://www.genome.jp/kegg-bin/show_pathway?ko00710+K00615+K01808+K00927+K01610+K01624+K01006+K01783+K04041+K01803+K00134+K00024+K01621+K01807+K00029+K11214+K11645+K02446+K01623+K01601+K00025+K01595+K00150+K03841+K00814+K14455+K00855	59778.4
ko00910	Metabolism	Energy metabolism	Nitrogen metabolism	http://www.genome.jp/kegg-bin/show_pathway?ko00910+K01915+K00926+K00265+K00262+K00266+K02588+K05601+K01673+K03385+K00362+K00372+K01455+K00367+K01501+K02586+K02591+K15371+K00459+K00368+K02575+K00260+K00370+K15876+K00261+K01725+K02567+K02568+K00374+K00376+K00371+K01948+K00284+K00264+K15578+K01672+K10534+K01674+K00363+K04561+K00366	48062.2
ko01110	Metabolism	Global and overview maps	Biosynthesis of secondary metabolites	http://www.genome.jp/kegg-bin/show_pathway?ko01110+K01945+K00956+K00764+K00826+K15633+K00939+K01736+K04093+K01755+K04517+K00705+K01952+K00615+K00605+K03785+K01687+K00688+K00703+K02501+K04486+K01808+K00548+K00700+K01933+K05349+K00067+K01187+K00873+K01689+K01733+K00052+K01953+K05942+K03182+K01176+K00239+K01652+K01649+K00265+K00147+K01478+K00928+K01714+K01657+K00651+K03737+K01613+K14155+K01735+K0175…	966634
ko01230	Metabolism	Global and overview maps	Biosynthesis of amino acids	http://www.genome.jp/kegg-bin/show_pathway?ko01230+K00826+K15633+K01736+K04093+K01755+K04517+K00615+K03785+K01687+K02501+K04486+K01808+K00548+K00873+K01689+K01733+K00052+K01953+K05942+K01915+K01652+K01649+K00265+K00147+K00928+K01714+K01657+K00651+K14155+K01735+K01752+K12524+K00640+K00058+K01778+K00927+K00215+K01696+K00013+K00014+K10206+K00789+K00620+K03340+K01940+K00800+K01586+K01624+K00817+K0168…	413807
ko01120	Metabolism	Global and overview maps	Microbial metabolism in diverse environments	http://www.genome.jp/kegg-bin/show_pathway?ko01120+K00956+K00400+K15633+K00656+K01034+K11212+K00615+K03738+K01808+K00873+K00925+K01689+K01733+K10218+K05942+K01915+K00239+K00926+K00265+K03778+K00928+K01714+K03737+K01938+K12524+K01835+K05606+K00640+K00100+K00177+K00262+K00058+K01778+K00927+K00215+K01885+K15024+K00174+K00865+K01792+K01610+K00844+K00241+K09459+K01810+K01586+K00175+K01624+K24042+K0168…	475601
ko01220	Metabolism	Global and overview maps	Degradation of aromatic compounds	http://www.genome.jp/kegg-bin/show_pathway?ko01220+K04072+K01666+K03186+K14731+K00001+K01053+K01607+K13954+K04112+K00002+K01821+K00055+K01856+K18364+K13953+K00529+K04114+K04073+K04108+K16050+K01857+K00449+K01055+K00121+K02554+K17754+K10217+K05714+K07544+K07104+K05921+K01612+K07535+K18365+K00481+K10216+K07540+K01617+K18366+K05711+K07546	6797.11
ko01212	Metabolism	Global and overview maps	Fatty acid metabolism	http://www.genome.jp/kegg-bin/show_pathway?ko01212+K00648+K01897+K00059+K00645+K01962+K00626+K00647+K16363+K09458+K02371+K00208+K02372+K01963+K11263+K11533+K01961+K00209+K00632+K07516+K00232+K02160+K01692+K00248+K00022+K07513+K00249+K10256+K01825+K13767+K10781+K01782+K00665+K01074+K22769+K18660+K22770+K00667+K10780+K10258+K18472+K15013+K09478+K10703+K22540+K10251+K07508	57147.7
ko01210	Metabolism	Global and overview maps	2-Oxocarboxylic acid metabolism	http://www.genome.jp/kegg-bin/show_pathway?ko01210+K00826+K01687+K00052+K05942+K01652+K01649+K00928+K00620+K01681+K00145+K00812+K00821+K01647+K00053+K01438+K09011+K00930+K00031+K00133+K00030+K05825+K11358+K01704+K14260+K01703+K01653+K22477+K14682+K10978+K00619+K00836+K05831+K10977+K14681+K16792+K22476+K00818+K00814+K16793+K01682+K05828+K05827+K14455+K01702+K05829	80975.7
ko01100	Metabolism	Global and overview maps	Metabolic pathways	http://www.genome.jp/kegg-bin/show_pathway?ko01100+K01945+K07258+K00956+K00764+K03639+K00826+K00400+K15633+K00939+K01736+K04093+K01197+K01755+K00656+K01034+K04517+K00705+K01139+K00796+K02232+K01667+K12373+K01952+K00756+K01000+K11212+K00615+K00605+K03785+K08744+K01687+K00688+K00703+K03800+K03738+K02501+K04486+K01808+K07407+K17723+K02377+K00548+K00525+K00700+K01745+K01955+K01933+K05349+K00067+K0118…	2.11093e+06
ko01200	Metabolism	Global and overview maps	Carbon metabolism	http://www.genome.jp/kegg-bin/show_pathway?ko01200+K15633+K00615+K00605+K03738+K01808+K00873+K00925+K01689+K05942+K00239+K00926+K03737+K01938+K01752+K05606+K00640+K00283+K00177+K00058+K00927+K00027+K15024+K00174+K01610+K00844+K00241+K01810+K00175+K01624+K01681+K01847+K01625+K00244+K01962+K01895+K00170+K00140+K00382+K00123+K00319+K00948+K01006+K01079+K01754+K00874+K00626+K00282+K01834+K00845+K0164…	277758
ko00513	Metabolism	Glycan biosynthesis and metabolism	Various types of N-glycan biosynthesis	http://www.genome.jp/kegg-bin/show_pathway?ko00513+K12373+K07151+K12668+K03843+K03844+K12666+K12670+K03842+K01231+K03714+K14459+K07432+K12669+K07441	11054.8
ko00512	Metabolism	Glycan biosynthesis and metabolism	Mucin type O-glycan biosynthesis	http://www.genome.jp/kegg-bin/show_pathway?ko00512+K00710	5.88889
ko00511	Metabolism	Glycan biosynthesis and metabolism	Other glycan degradation	http://www.genome.jp/kegg-bin/show_pathway?ko00511+K12373+K15923+K01190+K17108+K01192+K01191+K01206+K01186+K23989+K01201+K01227+K12111+K13714+K12311+K14459	87689.6
ko00510	Metabolism	Glycan biosynthesis and metabolism	N-Glycan biosynthesis	http://www.genome.jp/kegg-bin/show_pathway?ko00510+K00729+K00721+K01001+K07151+K12668+K05546+K03843+K03844+K12666+K00737+K12670+K03842+K01231+K03848+K07432+K12669+K07441+K03849	2551
ko00515	Metabolism	Glycan biosynthesis and metabolism	Mannose type O-glycan biosynthesis	http://www.genome.jp/kegg-bin/show_pathway?ko00515+K00728+K19872+K21031	1730.89
ko00514	Metabolism	Glycan biosynthesis and metabolism	Other types of O-glycan biosynthesis	http://www.genome.jp/kegg-bin/show_pathway?ko00514+K00728+K09667+K18134+K00710	1738.89
ko00540	Metabolism	Glycan biosynthesis and metabolism	Lipopolysaccharide biosynthesis	http://www.genome.jp/kegg-bin/show_pathway?ko00540+K02536+K02527+K00912+K00748+K02517+K00979+K15669+K19353+K01627+K16363+K03270+K03271+K03760+K06041+K00677+K07031+K02843+K03272+K03276+K02535+K02841+K03274+K03269+K03273+K21344+K09778+K02847+K21345+K03275+K03279+K02849+K02844+K12983+K07264+K03278+K03280+K11211+K02840	39344.9
ko00603	Metabolism	Glycan biosynthesis and metabolism	Glycosphingolipid biosynthesis - globo and isoglobo series	http://www.genome.jp/kegg-bin/show_pathway?ko00603+K12373+K07407+K07406+K00722+K01204	25471.2
ko00604	Metabolism	Glycan biosynthesis and metabolism	Glycosphingolipid biosynthesis - ganglio series	http://www.genome.jp/kegg-bin/show_pathway?ko00604+K12373+K00725	10885.4
ko00571	Metabolism	Glycan biosynthesis and metabolism	Lipoarabinomannan (LAM) biosynthesis	http://www.genome.jp/kegg-bin/show_pathway?ko00571+K13671+K11387+K22311+K14339+K16648+K16647+K14337+K14335+K13668+K08256+K13687	287.889
ko00572	Metabolism	Glycan biosynthesis and metabolism	Arabinogalactan biosynthesis - Mycobacterium	http://www.genome.jp/kegg-bin/show_pathway?ko00572+K02851+K16870+K13686+K16650+K16648+K16647+K18851+K22902+K16649+K13687	1169.33
ko00531	Metabolism	Glycan biosynthesis and metabolism	Glycosaminoglycan degradation	http://www.genome.jp/kegg-bin/show_pathway?ko00531+K01197+K12373+K01207+K01205+K01195+K01136+K01137	19842
ko00532	Metabolism	Glycan biosynthesis and metabolism	Glycosaminoglycan biosynthesis - chondroitin sulfate / dermatan sulfate	http://www.genome.jp/kegg-bin/show_pathway?ko00532+K13500	0.555556
ko00563	Metabolism	Glycan biosynthesis and metabolism	Glycosylphosphatidylinositol (GPI)-anchor biosynthesis	http://www.genome.jp/kegg-bin/show_pathway?ko00563+K05284+K05285+K05286+K05288+K03434+K05290+K03857	29.3333
ko00550	Metabolism	Glycan biosynthesis and metabolism	Peptidoglycan biosynthesis	http://www.genome.jp/kegg-bin/show_pathway?ko00550+K07258+K06153+K05515+K01000+K08384+K05366+K05367+K12555+K19302+K01924+K00806+K01928+K00075+K01921+K07260+K03587+K23393+K01929+K02563+K00790+K01925+K05362+K05364+K12556+K07259+K08724+K21464+K07009+K03814+K05363+K11694+K21469+K15792+K11693+K02545+K00887+K21465+K18770+K18866+K01798+K12552+K12554+K21466+K05365+K11695+K03693+K12553+K18149+K04478	118444
ko00061	Metabolism	Lipid metabolism	Fatty acid biosynthesis	http://www.genome.jp/kegg-bin/show_pathway?ko00061+K00648+K01897+K00059+K00645+K01962+K01071+K00647+K16363+K09458+K02371+K00208+K02372+K01963+K11263+K11533+K01961+K00209+K02160+K10782+K10781+K00665+K18660+K00667+K10780+K18472+K15013+K22540	56419.1
ko00120	Metabolism	Lipid metabolism	Primary bile acid biosynthesis	http://www.genome.jp/kegg-bin/show_pathway?ko00120+K01442+K01796	903.222
ko00121	Metabolism	Lipid metabolism	Secondary bile acid biosynthesis	http://www.genome.jp/kegg-bin/show_pathway?ko00121+K01442+K22606+K22604+K00076+K15868	909.556
ko00600	Metabolism	Lipid metabolism	Sphingolipid metabolism	http://www.genome.jp/kegg-bin/show_pathway?ko00600+K07407+K01190+K17108+K01186+K12349+K01201+K07406+K01130+K01202+K01634+K12350+K00720+K12354+K01134+K00654+K23727+K04718+K04708	60447.3
ko00062	Metabolism	Lipid metabolism	Fatty acid elongation	http://www.genome.jp/kegg-bin/show_pathway?ko00062+K00022+K01074+K10258+K10703+K10251+K07508	170.444
ko00071	Metabolism	Lipid metabolism	Fatty acid degradation	http://www.genome.jp/kegg-bin/show_pathway?ko00071+K01897+K04072+K00626+K00128+K00001+K13954+K05939+K00632+K07516+K00232+K01909+K01692+K00248+K00022+K13953+K07513+K05297+K00249+K00529+K01825+K13767+K00496+K01782+K00252+K00121+K15013+K09478+K13951+K07508	29230.1
ko00072	Metabolism	Lipid metabolism	Synthesis and degradation of ketone bodies	http://www.genome.jp/kegg-bin/show_pathway?ko00072+K00626+K01641+K01028+K01640+K01574+K01029+K00019	1915.22
ko00073	Metabolism	Lipid metabolism	Cutin, suberine and wax biosynthesis	http://www.genome.jp/kegg-bin/show_pathway?ko00073+K13356	1
ko01040	Metabolism	Lipid metabolism	Biosynthesis of unsaturated fatty acids	http://www.genome.jp/kegg-bin/show_pathway?ko01040+K10804+K00232+K07513+K10256+K22769+K22770+K10258+K10806+K10703+K10251+K10805	114.556
ko00100	Metabolism	Lipid metabolism	Steroid biosynthesis	http://www.genome.jp/kegg-bin/show_pathway?ko00100+K01052+K00801+K00559+K12298	174.667
ko00140	Metabolism	Lipid metabolism	Steroid hormone biosynthesis	http://www.genome.jp/kegg-bin/show_pathway?ko00140+K01130+K12343+K00699+K00038+K10251	1421.56
ko00564	Metabolism	Lipid metabolism	Glycerophospholipid metabolism	http://www.genome.jp/kegg-bin/show_pathway?ko00564+K08744+K01126+K01613+K06131+K00981+K03735+K00655+K00111+K00096+K00057+K17103+K00995+K01115+K13507+K00112+K00980+K08591+K00113+K03736+K05939+K01048+K01095+K04019+K18694+K17105+K07029+K00631+K00901+K01049+K19664+K15728+K06132+K13623+K17830+K00968+K06124+K13517+K16342+K00894+K13622+K00967+K01058+K19665+K18697+K13510+K00993+K01096+K17104+K00006+K0065…	47777.3
ko00565	Metabolism	Lipid metabolism	Ether lipid metabolism	http://www.genome.jp/kegg-bin/show_pathway?ko00565+K01115+K00803+K22387+K16794+K16342+K01058+K13510+K00993+K16795+K01062+K01114+K16817+K13519+K18575	1279.89
ko00561	Metabolism	Lipid metabolism	Glycerolipid metabolism	http://www.genome.jp/kegg-bin/show_pathway?ko00561+K07407+K00864+K00655+K00865+K11529+K03621+K03429+K01046+K00128+K07406+K13507+K00011+K00005+K08591+K19002+K05878+K00002+K19003+K19005+K05879+K00863+K07029+K00631+K00901+K05881+K15728+K06117+K13517+K14452+K03715+K13677+K00086+K00629+K18851+K13509+K17900+K15918+K13519+K22251+K01054+K12298+K18097	40672.3
ko00592	Metabolism	Lipid metabolism	alpha-Linolenic acid metabolism	http://www.genome.jp/kegg-bin/show_pathway?ko00592+K00632+K00232+K07513+K16342+K01058+K16817+K22389+K16818	528
ko00591	Metabolism	Lipid metabolism	Linoleic acid metabolism	http://www.genome.jp/kegg-bin/show_pathway?ko00591+K16342+K01058+K16817	400.556
ko00590	Metabolism	Lipid metabolism	Arachidonic acid metabolism	http://www.genome.jp/kegg-bin/show_pathway?ko00590+K00432+K04097+K01254+K16342+K01058+K00079+K16817+K15730	6133.89
ko00730	Metabolism	Metabolism of cofactors and vitamins	Thiamine metabolism	http://www.genome.jp/kegg-bin/show_pathway?ko00730+K00939+K06949+K04487+K03150+K01662+K01077+K00878+K00946+K00949+K14154+K03151+K00788+K03147+K03707+K06928+K00941+K22699+K10810+K10811+K03149+K14153+K03148+K01078+K18278+K03153	43811
ko00780	Metabolism	Metabolism of cofactors and vitamins	Biotin metabolism	http://www.genome.jp/kegg-bin/show_pathway?ko00780+K01012+K00059+K03524+K00652+K00647+K02169+K09458+K00833+K00208+K02372+K01906+K01935+K02170+K19561+K09789+K01947	30040.9
ko00785	Metabolism	Metabolism of cofactors and vitamins	Lipoic acid metabolism	http://www.genome.jp/kegg-bin/show_pathway?ko00785+K03800+K03801+K03644+K23734	4098.33
ko00760	Metabolism	Metabolism of cofactors and vitamins	Nicotinate and nicotinamide metabolism	http://www.genome.jp/kegg-bin/show_pathway?ko00760+K03426+K03743+K00767+K00969+K00858+K03787+K01239+K11751+K01950+K01916+K06989+K01081+K03784+K00278+K08693+K03783+K03742+K00763+K00952+K00135+K00325+K03517+K15358+K00324+K08723+K08281+K06211+K04765+K20454+K11412+K20451+K20448+K20449+K11121+K06210+K19647+K20452+K03462+K20446+K20445+K01240+K20447+K19970+K11416+K20881+K20450+K01799+K11417+K11413+K0032…	53095.8
ko00860	Metabolism	Metabolism of cofactors and vitamins	Porphyrin and chlorophyll metabolism	http://www.genome.jp/kegg-bin/show_pathway?ko00860+K02232+K02190+K00798+K02189+K01599+K05936+K01885+K02230+K02233+K04032+K02224+K22227+K03594+K22011+K13542+K05895+K02231+K00768+K01845+K05934+K02188+K02226+K02227+K00595+K01749+K19221+K03394+K02495+K01719+K01698+K01195+K04720+K06042+K02304+K03399+K22226+K00231+K21612+K02303+K22316+K02492+K19073+K21610+K03405+K19712+K02191+K21611+K02302+K00230+K0988…	58835
ko00750	Metabolism	Metabolism of cofactors and vitamins	Vitamin B6 metabolism	http://www.genome.jp/kegg-bin/show_pathway?ko00750+K01733+K00097+K00868+K00831+K03474+K03473+K08681+K05275+K06215+K00275+K18609	20000
ko00740	Metabolism	Metabolism of cofactors and vitamins	Riboflavin metabolism	http://www.genome.jp/kegg-bin/show_pathway?ko00740+K11752+K09474+K11753+K21064+K21063+K14652+K00793+K19285+K08096+K14654+K20862+K00794+K19286+K14656+K04719+K14410+K02858+K07732+K01078+K20860+K14653+K20861+K23462+K00299	18293.3
ko00130	Metabolism	Metabolism of cofactors and vitamins	Ubiquinone and other terpenoid-quinone biosynthesis	http://www.genome.jp/kegg-bin/show_pathway?ko00130+K03182+K03183+K02551+K02548+K01911+K03186+K03809+K02361+K02549+K00355+K11784+K19267+K09834+K01661+K11783+K20810+K03179+K11785+K11782+K18284+K18285+K00457+K05928+K08680+K02552+K00568+K19222	13879.7
ko00790	Metabolism	Metabolism of cofactors and vitamins	Folate biosynthesis	http://www.genome.jp/kegg-bin/show_pathway?ko00790+K03639+K00796+K07141+K11754+K00287+K01077+K00950+K14652+K03831+K06920+K01737+K10026+K00011+K01633+K03750+K09457+K13818+K03637+K06897+K01495+K03752+K07142+K08310+K13940+K01665+K13941+K03635+K17488+K18853+K03638+K02619+K09007+K06879+K13950+K09739+K07589+K22391+K06984+K01664+K01113+K00079+K03342+K01724+K15376+K18590+K17487+K18591+K22099+K13939+K18824	37195.9
ko00830	Metabolism	Metabolism of cofactors and vitamins	Retinol metabolism	http://www.genome.jp/kegg-bin/show_pathway?ko00830+K09516+K00001+K11153+K13953+K11147+K00699+K00121+K13951	3186.11
ko00770	Metabolism	Metabolism of cofactors and vitamins	Pantothenate and CoA biosynthesis	http://www.genome.jp/kegg-bin/show_pathway?ko00770+K00826+K01687+K17723+K00954+K01652+K03525+K00606+K00997+K01598+K00053+K00859+K01464+K00077+K13038+K06133+K21977+K01918+K09680+K01579+K01653+K02318+K01431+K04765+K17722+K09722+K06982+K18933+K00207+K02201+K00867+K01947	45299.1
ko00670	Metabolism	Metabolism of cofactors and vitamins	One carbon pool by folate	http://www.genome.jp/kegg-bin/show_pathway?ko00670+K00605+K00548+K00604+K01938+K11175+K01433+K00287+K13990+K00560+K24042+K00602+K01491+K00600+K00297+K01934+K03465+K01500+K08289+K00603+K01746+K00288+K13403+K18590+K00289+K18591	55104
ko00450	Metabolism	Metabolism of other amino acids	Selenocompound metabolism	http://www.genome.jp/kegg-bin/show_pathway?ko00450+K00956+K00548+K14155+K00384+K11717+K01874+K24042+K01763+K01042+K12527+K12529+K12528+K00549+K01008+K00957+K01739+K01760+K01761+K00955+K00958+K07309+K01758+K07310+K22182+K03341	41371.8
ko00460	Metabolism	Metabolism of other amino acids	Cyanoamino acid metabolism	http://www.genome.jp/kegg-bin/show_pathway?ko00460+K05349+K01424+K01914+K00681+K00600+K05350+K01455+K01501+K18282+K01188+K13051	65987.1
ko00430	Metabolism	Metabolism of other amino acids	Taurine and hypotaurine metabolism	http://www.genome.jp/kegg-bin/show_pathway?ko00430+K00925+K15024+K00681+K19244+K00625+K00259+K15372+K15371+K00260+K13788+K01594+K00456+K01580+K03851	12624.8
ko00480	Metabolism	Metabolism of other amino acids	Glutathione metabolism	http://www.genome.jp/kegg-bin/show_pathway?ko00480+K01270+K00681+K01919+K01256+K00432+K00031+K01581+K07160+K00033+K01255+K00383+K00797+K00036+K23124+K04097+K00799+K06048+K21456+K11204+K05361+K01469+K23790+K20838	23500.2
ko00471	Metabolism	Metabolism of other amino acids	D-Glutamine and D-glutamate metabolism	http://www.genome.jp/kegg-bin/show_pathway?ko00471+K01776+K01924+K01925+K23170+K23265+K23169+K01425+K00261	20632.7
ko00472	Metabolism	Metabolism of other amino acids	D-Arginine and D-ornithine metabolism	http://www.genome.jp/kegg-bin/show_pathway?ko00472+K17898+K21898+K00824+K17899+K21672+K00273	1533.89
ko00473	Metabolism	Metabolism of other amino acids	D-Alanine metabolism	http://www.genome.jp/kegg-bin/show_pathway?ko00473+K01775+K01921+K03367+K00824+K01798+K14188	13965.6
ko00440	Metabolism	Metabolism of other amino acids	Phosphonate and phosphinate metabolism	http://www.genome.jp/kegg-bin/show_pathway?ko00440+K09459+K03823+K06167+K20859+K01841+K03430+K19670+K23999+K00968+K00967+K09994+K00993	6556.67
ko00410	Metabolism	Metabolism of other amino acids	beta-Alanine metabolism	http://www.genome.jp/kegg-bin/show_pathway?ko00410+K17723+K00140+K01464+K00128+K01918+K01579+K00823+K00232+K07250+K01431+K15372+K01692+K17722+K00248+K09722+K01825+K00822+K18933+K01782+K00207+K01580+K00137+K13366	10189
ko01051	Metabolism	Metabolism of terpenoids and polyketides	Biosynthesis of ansamycins	http://www.genome.jp/kegg-bin/show_pathway?ko01051+K00615+K15670+K16020	14148.1
ko01053	Metabolism	Metabolism of terpenoids and polyketides	Biosynthesis of siderophore group nonribosomal peptides	http://www.genome.jp/kegg-bin/show_pathway?ko01053+K02361+K04784+K04780+K04786+K02363+K12240+K02552+K04793+K02364+K04782+K04783+K04789+K01252+K00216+K04788+K04792+K12239	1152.56
ko01052	Metabolism	Metabolism of terpenoids and polyketides	Type I polyketide structures	http://www.genome.jp/kegg-bin/show_pathway?ko01052+K16416+K15670+K16378	5.66667
ko01055	Metabolism	Metabolism of terpenoids and polyketides	Biosynthesis of vancomycin group antibiotics	http://www.genome.jp/kegg-bin/show_pathway?ko01055+K16435+K01710+K16428+K16436+K16429+K16422	3851
ko01054	Metabolism	Metabolism of terpenoids and polyketides	Nonribosomal peptide structures	http://www.genome.jp/kegg-bin/show_pathway?ko01054+K16093+K01779+K15654+K15667+K15662+K15663+K15668+K15655+K15661+K16122+K15666+K16095+K16124+K16120+K16119+K15664+K16123+K15665+K16094+K16126+K16099+K16130+K16118+K15656	1749.11
ko01057	Metabolism	Metabolism of terpenoids and polyketides	Biosynthesis of type II polyketide products	http://www.genome.jp/kegg-bin/show_pathway?ko01057+K05555+K05556+K15942	43.4444
ko00281	Metabolism	Metabolism of terpenoids and polyketides	Geraniol degradation	http://www.genome.jp/kegg-bin/show_pathway?ko00281+K00632+K01692+K00022+K01640+K01825+K01782+K13775+K11731	411.444
ko01059	Metabolism	Metabolism of terpenoids and polyketides	Biosynthesis of enediyne antibiotics	http://www.genome.jp/kegg-bin/show_pathway?ko01059+K21224+K21159+K21210	7.55556
ko00981	Metabolism	Metabolism of terpenoids and polyketides	Insect hormone biosynthesis	http://www.genome.jp/kegg-bin/show_pathway?ko00981+K00128+K15890	2566.44
ko00253	Metabolism	Metabolism of terpenoids and polyketides	Tetracycline biosynthesis	http://www.genome.jp/kegg-bin/show_pathway?ko00253+K18221	208.667
ko00909	Metabolism	Metabolism of terpenoids and polyketides	Sesquiterpenoid and triterpenoid biosynthesis	http://www.genome.jp/kegg-bin/show_pathway?ko00909+K06045+K00801+K15891	260.111
ko00902	Metabolism	Metabolism of terpenoids and polyketides	Monoterpenoid biosynthesis	http://www.genome.jp/kegg-bin/show_pathway?ko00902+K23232+K15095	27.8889
ko00523	Metabolism	Metabolism of terpenoids and polyketides	Polyketide sugar unit biosynthesis	http://www.genome.jp/kegg-bin/show_pathway?ko00523+K00067+K00973+K16435+K01710+K01790+K13327+K23144+K13328+K17947+K23987+K16436	16460.6
ko00908	Metabolism	Metabolism of terpenoids and polyketides	Zeatin biosynthesis	http://www.genome.jp/kegg-bin/show_pathway?ko00908+K00791	7900.67
ko00906	Metabolism	Metabolism of terpenoids and polyketides	Carotenoid biosynthesis	http://www.genome.jp/kegg-bin/show_pathway?ko00906+K09835+K10027+K02291+K10212+K06443+K02293+K09841	634.556
ko00900	Metabolism	Metabolism of terpenoids and polyketides	Terpenoid backbone biosynthesis	http://www.genome.jp/kegg-bin/show_pathway?ko00900+K00805+K06981+K00806+K00991+K03526+K00099+K00919+K13789+K01662+K01770+K00626+K00054+K03527+K06013+K01641+K02523+K13787+K01597+K01823+K12506+K12503+K00869+K15888+K00795+K00021+K11778+K05954+K15890+K00938+K15891+K05955+K00804+K05906+K05356+K00587	52162.7
ko00903	Metabolism	Metabolism of terpenoids and polyketides	Limonene and pinene degradation	http://www.genome.jp/kegg-bin/show_pathway?ko00903+K00128+K14731+K01692+K01825+K01782	3207
ko00230	Metabolism	Nucleotide metabolism	Purine metabolism	http://www.genome.jp/kegg-bin/show_pathway?ko00230+K01945+K00956+K00764+K00939+K01139+K01952+K00525+K01933+K00873+K00926+K02428+K00942+K01839+K00759+K01835+K01588+K11175+K03787+K01129+K00951+K01239+K01515+K00088+K01756+K11751+K21636+K01939+K01488+K00087+K01923+K00602+K01951+K00948+K00760+K01081+K01768+K00860+K03784+K03816+K01486+K18532+K08693+K03783+K13479+K16841+K23269+K01524+K01487+K01119+K2326…	181879
ko00240	Metabolism	Nucleotide metabolism	Pyrimidine metabolism	http://www.genome.jp/kegg-bin/show_pathway?ko00240+K00756+K17723+K00525+K01955+K00876+K00945+K00757+K02823+K03787+K11751+K01465+K01937+K21636+K00609+K01591+K00560+K02825+K17828+K16329+K01081+K01493+K08722+K03784+K16328+K00943+K01956+K00610+K01520+K00761+K00762+K01464+K00758+K08693+K01489+K03783+K00254+K01485+K00857+K09903+K03465+K03365+K01119+K08723+K13800+K01494+K00226+K10213+K06016+K01431+K0476…	140180
ko00633	Metabolism	Xenobiotics biodegradation and metabolism	Nitrotoluene degradation	http://www.genome.jp/kegg-bin/show_pathway?ko00633+K00170+K00198+K00172+K00196+K00169+K00171+K10680+K06281+K06282+K11181+K11180	2037.44
ko00643	Metabolism	Xenobiotics biodegradation and metabolism	Styrene degradation	http://www.genome.jp/kegg-bin/show_pathway?ko00643+K01026+K01501+K01426+K01040+K01039+K20626+K20627+K07104+K00146+K10216+K00451	1567.11
ko00642	Metabolism	Xenobiotics biodegradation and metabolism	Ethylbenzene degradation	http://www.genome.jp/kegg-bin/show_pathway?ko00642+K00632	95.1111
ko00930	Metabolism	Xenobiotics biodegradation and metabolism	Caprolactam degradation	http://www.genome.jp/kegg-bin/show_pathway?ko00930+K14731+K01053+K00002+K01692+K00022+K01825+K00496+K01782+K06446+K18199+K17754	1521.89
ko00361	Metabolism	Xenobiotics biodegradation and metabolism	Chlorocyclohexane and chlorobenzene degradation	http://www.genome.jp/kegg-bin/show_pathway?ko00361+K01560+K01856+K01563+K01061+K01561+K07104	1416.22
ko00362	Metabolism	Xenobiotics biodegradation and metabolism	Benzoate degradation	http://www.genome.jp/kegg-bin/show_pathway?ko00362+K10218+K00626+K20509+K23352+K01666+K00074+K23351+K01607+K04112+K00632+K01615+K01821+K07516+K01692+K01856+K18364+K01825+K04114+K16515+K04073+K13767+K04108+K01782+K00252+K01857+K00449+K01055+K02554+K10217+K14333+K07104+K07535+K18365+K04117+K00481+K10216+K01617+K18366+K04116+K20941	12701.8
ko00364	Metabolism	Xenobiotics biodegradation and metabolism	Fluorobenzoate degradation	http://www.genome.jp/kegg-bin/show_pathway?ko00364+K01856+K20806+K01061	113
ko00365	Metabolism	Xenobiotics biodegradation and metabolism	Furfural degradation	http://www.genome.jp/kegg-bin/show_pathway?ko00365+K16874+K16876	66.2222
ko00984	Metabolism	Xenobiotics biodegradation and metabolism	Steroid degradation	http://www.genome.jp/kegg-bin/show_pathway?ko00984+K16050+K18687+K03333+K16051+K05898	49.1111
ko00980	Metabolism	Xenobiotics biodegradation and metabolism	Metabolism of xenobiotics by cytochrome P450	http://www.genome.jp/kegg-bin/show_pathway?ko00980+K00001+K15303+K13953+K04097+K00799+K00699+K00079+K00121+K00078+K13951+K23790	673.333
ko00983	Metabolism	Xenobiotics biodegradation and metabolism	Drug metabolism - other enzymes	http://www.genome.jp/kegg-bin/show_pathway?ko00983+K00876+K00757+K00088+K01951+K00760+K01520+K01464+K00758+K01489+K00857+K01195+K13800+K03782+K01431+K00940+K00799+K00699+K00207+K01044+K01519+K03927+K23790	41108.9
ko00625	Metabolism	Xenobiotics biodegradation and metabolism	Chloroalkane and chloroalkene degradation	http://www.genome.jp/kegg-bin/show_pathway?ko00625+K04072+K02588+K00128+K00001+K13954+K01560+K02586+K02591+K13953+K01563+K20625+K01561+K00121	7352
ko00624	Metabolism	Xenobiotics biodegradation and metabolism	Polycyclic aromatic hydrocarbon degradation	http://www.genome.jp/kegg-bin/show_pathway?ko00624+K00449	5
ko00627	Metabolism	Xenobiotics biodegradation and metabolism	Aminobenzoate degradation	http://www.genome.jp/kegg-bin/show_pathway?ko00627+K01034+K22958+K03186+K01512+K01501+K01035+K15066+K01426+K01692+K01101+K04108+K10215+K08295+K22960+K19709+K14333+K21802+K01612+K09461	2811.56
ko00626	Metabolism	Xenobiotics biodegradation and metabolism	Naphthalene degradation	http://www.genome.jp/kegg-bin/show_pathway?ko00626+K04072+K00001+K13954+K13953+K00121	2052.78
ko00621	Metabolism	Xenobiotics biodegradation and metabolism	Dioxin degradation	http://www.genome.jp/kegg-bin/show_pathway?ko00621+K01666+K01821+K18364+K04073+K02554+K18365+K01617+K18366	811.778
ko00623	Metabolism	Xenobiotics biodegradation and metabolism	Toluene degradation	http://www.genome.jp/kegg-bin/show_pathway?ko00623+K00055+K01856+K01061+K07544+K07540+K07546	169.889
ko00622	Metabolism	Xenobiotics biodegradation and metabolism	Xylene degradation	http://www.genome.jp/kegg-bin/show_pathway?ko00622+K01666+K01821+K00055+K18364+K04073+K02554+K10217+K07104+K18365+K10216+K01617+K18366	870
ko00791	Metabolism	Xenobiotics biodegradation and metabolism	Atrazine degradation	http://www.genome.jp/kegg-bin/show_pathway?ko00791+K03382+K01428+K01427+K01941+K14048+K01429+K01430+K03383	59.5556
ko00982	Metabolism	Xenobiotics biodegradation and metabolism	Drug metabolism - cytochrome P450	http://www.genome.jp/kegg-bin/show_pathway?ko00982+K00001+K13953+K04097+K00799+K00699+K00121+K13951+K23790+K00274	498
ko04211	Organismal Systems	Aging	Longevity regulating pathway	http://www.genome.jp/kegg-bin/show_pathway?ko04211+K07198+K04564+K07359+K04345+K08339+K21357+K07827+K04456+K07203+K00922+K07208+K07199+K03259+K02833+K03781+K07201+K07297+K04688+K10141+K05869+K07298+K07200+K11411	4306.67
ko04212	Organismal Systems	Aging	Longevity regulating pathway - worm	http://www.genome.jp/kegg-bin/show_pathway?ko04212+K01358+K04043+K04077+K01110+K04564+K16197+K08269+K04456+K07203+K00799+K00922+K08341+K03781+K10798+K11204+K04688+K09414+K17491+K19765+K14966+K13356+K11411	21038.2
ko04213	Organismal Systems	Aging	Longevity regulating pathway - multiple species	http://www.genome.jp/kegg-bin/show_pathway?ko04213+K03695+K01768+K07198+K03283+K04564+K04345+K08339+K07827+K04456+K07203+K19800+K00922+K12767+K07199+K02833+K03781+K07201+K11121+K06067+K04688+K04565+K07200+K11411	15340.3
ko04261	Organismal Systems	Circulatory system	Adrenergic signaling in cardiomyocytes	http://www.genome.jp/kegg-bin/show_pathway?ko04261+K05850+K04345+K02183+K06269+K04456+K11583+K04371+K04445+K04354+K21289+K03456+K04382+K12314+K05858+K09821+K04962+K01539+K11584+K04515+K05865+K02677+K17751+K04851+K04853+K05849+K01538+K05853	3964.22
ko04260	Organismal Systems	Circulatory system	Cardiac muscle contraction	http://www.genome.jp/kegg-bin/show_pathway?ko04260+K00412+K00476+K02261+K12314+K04962+K01539+K02265+K05865+K02256+K00414+K17751+K02262+K04851+K04853+K05849+K01538+K05853	159.222
ko04270	Organismal Systems	Circulatory system	Vascular smooth muscle contraction	http://www.genome.jp/kegg-bin/show_pathway?ko04270+K07376+K04345+K02183+K06269+K18051+K16342+K04958+K04371+K06068+K00907+K05858+K04960+K04514+K04368+K09821+K05274+K17388+K06270+K02677+K12751+K12327+K18050+K04851+K04853+K04936+K17457	2954.44
ko04380	Organismal Systems	Development and regeneration	Osteoclast differentiation	http://www.genome.jp/kegg-bin/show_pathway?ko04380+K04456+K00922+K04427+K04371+K06268+K04348+K04467+K04368+K03175+K05856+K04392+K05869+K14381+K01371+K04431+K03173	560.444
ko04360	Organismal Systems	Development and regeneration	Axon guidance	http://www.genome.jp/kegg-bin/show_pathway?ko04360+K05766+K07827+K03083+K00922+K05733+K05743+K02833+K04371+K02090+K05765+K07829+K06268+K04348+K01116+K04514+K04392+K05113+K04515+K17388+K12757+K04409+K02677+K06838+K05734+K07293	845.889
ko04361	Organismal Systems	Development and regeneration	Axon regeneration	http://www.genome.jp/kegg-bin/show_pathway?ko04361+K07198+K01110+K10393+K04345+K00901+K04430+K07203+K00922+K10693+K06068+K05858+K04688+K04459+K04392+K12035+K04431+K04851+K11593+K04417	3021.22
ko04320	Organismal Systems	Development and regeneration	Dorso-ventral axis formation	http://www.genome.jp/kegg-bin/show_pathway?ko04320+K03099+K07827+K02156+K04371+K04368+K03102	649.889
ko04971	Organismal Systems	Digestive system	Gastric acid secretion	http://www.genome.jp/kegg-bin/show_pathway?ko04971+K04345+K02183+K04958+K05692+K00907+K05858+K04960+K01539+K05031+K04515+K02677	1471.44
ko04970	Organismal Systems	Digestive system	Salivary secretion	http://www.genome.jp/kegg-bin/show_pathway?ko04970+K05850+K07376+K04345+K02183+K04958+K13912+K13899+K05858+K04960+K19477+K01539+K02677+K04936+K13915+K01538	3505.67
ko04973	Organismal Systems	Digestive system	Carbohydrate digestion and absorption	http://www.genome.jp/kegg-bin/show_pathway?ko04973+K01176+K00844+K04456+K00922+K12047+K01229+K05858+K01539+K01203+K04851+K01538	9128.33
ko04972	Organismal Systems	Digestive system	Pancreatic secretion	http://www.genome.jp/kegg-bin/show_pathway?ko04972+K01176+K09632+K05850+K07904+K07901+K04958+K01345+K05858+K04960+K01346+K04962+K01539+K01312+K05031+K04392+K07884+K02677+K05030+K01310+K12298+K04936+K01538+K05853	10929.8
ko04975	Organismal Systems	Digestive system	Fat digestion and absorption	http://www.genome.jp/kegg-bin/show_pathway?ko04975+K14452+K05641+K13509+K08760+K14455+K12298+K14462	114.556
ko04974	Organismal Systems	Digestive system	Protein digestion and absorption	http://www.genome.jp/kegg-bin/show_pathway?ko04974+K01278+K09632+K16628+K06238+K06237+K08606+K19721+K01345+K01346+K01539+K14207+K06236+K01312+K08133+K01310+K06002+K08187+K05849+K01395+K01538	9334.67
ko04977	Organismal Systems	Digestive system	Vitamin digestion and absorption	http://www.genome.jp/kegg-bin/show_pathway?ko04977+K05665+K14617+K14611+K14616+K08760+K14462	327
ko04976	Organismal Systems	Digestive system	Bile secretion	http://www.genome.jp/kegg-bin/show_pathway?ko04976+K05658+K04345+K00021+K05667+K05666+K05673+K05664+K05659+K01539+K05031+K12473+K14349+K09869+K01538	1480
ko04979	Organismal Systems	Digestive system	Cholesterol metabolism	http://www.genome.jp/kegg-bin/show_pathway?ko04979+K04524+K05770+K15040+K01052+K00650+K12385+K05664+K05641+K22286+K22287+K08760+K13443+K12473+K04550+K14349+K06233+K14462+K08758	407.222
ko04978	Organismal Systems	Digestive system	Mineral absorption	http://www.genome.jp/kegg-bin/show_pathway?ko04978+K05850+K07213+K14736+K05011+K01539+K00522+K14686+K14683+K05849+K01538	1540.44
ko04929	Organismal Systems	Endocrine system	GnRH secretion	http://www.genome.jp/kegg-bin/show_pathway?ko04929+K07827+K04456+K00922+K02833+K04958+K04371+K04955+K05858+K04960+K04368+K04856+K02677+K04851+K04853	641.778
ko04922	Organismal Systems	Endocrine system	Glucagon signaling pathway	http://www.genome.jp/kegg-bin/show_pathway?ko04922+K00688+K00873+K00016+K01834+K07198+K00850+K01596+K04345+K00871+K02183+K04456+K00162+K07199+K04958+K07201+K11434+K15423+K03841+K06268+K04348+K05858+K04960+K00161+K04515+K16311+K17491+K12407+K07200+K11411	22181.3
ko04923	Organismal Systems	Endocrine system	Regulation of lipolysis in adipocytes	http://www.genome.jp/kegg-bin/show_pathway?ko04923+K07376+K04345+K04456+K00922+K07188+K19477+K16817+K13699+K01054	1795.89
ko04920	Organismal Systems	Endocrine system	Adipocytokine signaling pathway	http://www.genome.jp/kegg-bin/show_pathway?ko04920+K01897+K07198+K01596+K07359+K04456+K07203+K07199+K07297+K04447+K04467+K15013+K07298+K07200+K03173+K07293	23795.8
ko04921	Organismal Systems	Endocrine system	Oxytocin signaling pathway	http://www.genome.jp/kegg-bin/show_pathway?ko04921+K07198+K07359+K03234+K04345+K08794+K02183+K06269+K07827+K07199+K16342+K02833+K04958+K04371+K05692+K21289+K00907+K04464+K06268+K04348+K05858+K04960+K04514+K04368+K04962+K05869+K04515+K17388+K06270+K02677+K12751+K07200+K04851+K04853+K04961+K17457	4182.78
ko04926	Organismal Systems	Endocrine system	Relaxin signaling pathway	http://www.genome.jp/kegg-bin/show_pathway?ko04926+K04345+K03099+K04430+K07827+K04456+K06237+K00922+K02833+K13241+K04371+K05858+K04368+K06236+K04431+K02677+K04536	1219.89
ko04927	Organismal Systems	Endocrine system	Cortisol synthesis and secretion	http://www.genome.jp/kegg-bin/show_pathway?ko04927+K04345+K04958+K05858+K04960+K09821+K04856+K12473+K14349+K04851+K04853+K18437	724.333
ko04924	Organismal Systems	Endocrine system	Renin secretion	http://www.genome.jp/kegg-bin/show_pathway?ko04924+K13755+K04345+K01363+K02183+K01283+K04958+K06268+K04348+K05858+K04960+K19477+K09821+K05030+K04851+K04853+K04936	1764
ko04925	Organismal Systems	Endocrine system	Aldosterone synthesis and secretion	http://www.genome.jp/kegg-bin/show_pathway?ko04925+K05850+K04345+K08794+K02183+K04958+K07188+K06070+K05858+K04960+K09821+K01539+K05869+K04919+K04515+K04856+K12473+K02677+K18050+K04851+K04853	2964.89
ko04928	Organismal Systems	Endocrine system	Parathyroid hormone synthesis, secretion and action	http://www.genome.jp/kegg-bin/show_pathway?ko04928+K01115+K04345+K13293+K04958+K04371+K03626+K05858+K04960+K04368+K02677+K14683+K07997	1513.78
ko04919	Organismal Systems	Endocrine system	Thyroid hormone signaling pathway	http://www.genome.jp/kegg-bin/show_pathway?ko04919+K04345+K06276+K07827+K04456+K07203+K03083+K00922+K07208+K02833+K07201+K04371+K05692+K11256+K06067+K05857+K11644+K05858+K01116+K04368+K01539+K06062+K05860+K01114+K05861+K02677+K17751+K08187+K01538+K05853	1991.11
ko04918	Organismal Systems	Endocrine system	Thyroid hormone synthesis	http://www.genome.jp/kegg-bin/show_pathway?ko04918+K00432+K00383+K04345+K04958+K09490+K09487+K16141+K09582+K05858+K04960+K01539+K02677+K06233+K10064+K01538	6909
ko04913	Organismal Systems	Endocrine system	Ovarian steroidogenesis	http://www.genome.jp/kegg-bin/show_pathway?ko04913+K04345+K16342+K12473	606.111
ko04912	Organismal Systems	Endocrine system	GnRH signaling pathway	http://www.genome.jp/kegg-bin/show_pathway?ko04912+K01115+K04421+K04345+K03099+K02183+K04430+K07827+K16342+K02833+K04958+K04371+K06068+K04464+K05858+K04960+K04368+K04515+K04431+K04420+K02677+K04851+K04853	1938.11
ko04911	Organismal Systems	Endocrine system	Insulin secretion	http://www.genome.jp/kegg-bin/show_pathway?ko04911+K04345+K05858+K04960+K04962+K01539+K04560+K05032+K04515+K05274+K02677+K12407+K04851+K04853+K04936+K01538	766.889
ko04910	Organismal Systems	Endocrine system	Insulin signaling pathway	http://www.genome.jp/kegg-bin/show_pathway?ko04910+K00688+K00844+K07192+K07198+K01596+K04739+K04345+K03099+K00871+K06276+K02183+K06269+K07827+K04456+K02991+K07203+K03083+K00922+K07208+K07199+K03259+K02833+K07201+K00665+K04371+K03841+K07188+K06069+K04368+K01106+K04688+K15909+K12407+K07200+K04372	17747
ko04917	Organismal Systems	Endocrine system	Prolactin signaling pathway	http://www.genome.jp/kegg-bin/show_pathway?ko04917+K00965+K03099+K07827+K04456+K03083+K00922+K02833+K04371+K04447+K04368+K12407	2158.56
ko04916	Organismal Systems	Endocrine system	Melanogenesis	http://www.genome.jp/kegg-bin/show_pathway?ko04916+K04345+K02183+K07827+K03083+K02833+K04371+K05858+K04368+K04515+K02677	1649.89
ko04915	Organismal Systems	Endocrine system	Estrogen signaling pathway	http://www.genome.jp/kegg-bin/show_pathway?ko04915+K04079+K03283+K04345+K03099+K02183+K07827+K04456+K00922+K02833+K04958+K04371+K11256+K09487+K06068+K05858+K04960+K04368+K09571+K01379+K22456	9643
ko04914	Organismal Systems	Endocrine system	Progesterone-mediated oocyte maturation	http://www.genome.jp/kegg-bin/show_pathway?ko04914+K04079+K03364+K06627+K04345+K06631+K05868+K07827+K11481+K04456+K03355+K00922+K02206+K04371+K06633+K02087+K04373+K03348+K21771+K04368+K03353+K03357+K10403+K21770+K03350+K03349+K03358	8966.89
ko03320	Organismal Systems	Endocrine system	PPAR signaling pathway	http://www.genome.jp/kegg-bin/show_pathway?ko03320+K01897+K00864+K01641+K01596+K00029+K08770+K06276+K00232+K07513+K00249+K08752+K08746+K15013+K17284+K08762+K08758	28894.2
ko04614	Organismal Systems	Endocrine system	Renin-angiotensin system	http://www.genome.jp/kegg-bin/show_pathway?ko04614+K01322+K01283+K13289+K09821+K01392	1595.56
ko04935	Organismal Systems	Endocrine system	Growth hormone synthesis, secretion and action	http://www.genome.jp/kegg-bin/show_pathway?ko04935+K04345+K03099+K04430+K07827+K04456+K07203+K03083+K00922+K02833+K04958+K04371+K11265+K04447+K05858+K04960+K01116+K04368+K02677+K04851+K04853	1679.22
ko04711	Organismal Systems	Environmental adaptation	Circadian rhythm - fly	http://www.genome.jp/kegg-bin/show_pathway?ko04711+K08960+K03083	369.667
ko04710	Organismal Systems	Environmental adaptation	Circadian rhythm	http://www.genome.jp/kegg-bin/show_pathway?ko04710+K07198+K08960+K03094+K07199+K08959+K03362+K03868+K03347+K07200	1723.56
ko04713	Organismal Systems	Environmental adaptation	Circadian entrainment	http://www.genome.jp/kegg-bin/show_pathway?ko04713+K07376+K04345+K02183+K04958+K04371+K11265+K04445+K05858+K04960+K19477+K04962+K04515+K04856+K02677+K04851+K04536+K04961	2449.78
ko04712	Organismal Systems	Environmental adaptation	Circadian rhythm - plant	http://www.genome.jp/kegg-bin/show_pathway?ko04712+K03115+K10143+K03097+K12133	202.222
ko04714	Organismal Systems	Environmental adaptation	Thermogenesis	http://www.genome.jp/kegg-bin/show_pathway?ko04714+K01897+K07198+K07376+K04345+K03099+K00412+K02132+K07827+K02991+K07203+K02128+K07208+K07199+K02133+K02833+K03878+K03884+K05692+K11265+K04373+K11648+K03879+K11650+K11340+K02261+K07188+K02259+K03883+K03943+K19477+K08266+K04688+K11649+K11416+K02265+K00235+K04426+K03936+K02257+K02256+K11647+K00414+K01054+K02262+K07200+K02138+K02127+K02126	25274.3
ko04626	Organismal Systems	Environmental adaptation	Plant-pathogen interaction	http://www.genome.jp/kegg-bin/show_pathway?ko04626+K00864+K04079+K13412+K02406+K12340+K02358+K02183+K01373+K13409+K12795+K09487+K13448+K04368+K13420+K13414+K13416+K13449+K13413+K13457	27908.8
ko04964	Organismal Systems	Excretory system	Proximal tubule bicarbonate reclamation	http://www.genome.jp/kegg-bin/show_pathway?ko04964+K01596+K01425+K00261+K00025+K01539+K01538	2739.11
ko04962	Organismal Systems	Excretory system	Vasopressin-regulated water reabsorption	http://www.genome.jp/kegg-bin/show_pathway?ko04962+K10416+K07904+K04345+K07889+K06027+K07905+K10413+K10414+K10418+K10415+K07887+K07888+K10426+K10417+K10427	2162.89
ko04960	Organismal Systems	Excretory system	Aldosterone-regulated sodium reabsorption	http://www.genome.jp/kegg-bin/show_pathway?ko04960+K06276+K07827+K00922+K04371+K13302+K01539+K02677+K06644+K01538	613.889
ko04961	Organismal Systems	Excretory system	Endocrine and other factor-regulated calcium reabsorption	http://www.genome.jp/kegg-bin/show_pathway?ko04961+K04646+K05850+K07904+K04345+K11827+K05858+K01539+K11824+K11826+K11825+K02677+K05849+K01538	2693.78
ko04966	Organismal Systems	Excretory system	Collecting duct acid secretion	http://www.genome.jp/kegg-bin/show_pathway?ko04966+K02154+K02145+K02155+K02150+K02146+K02151+K02149+K02147+K02148	714.778
ko04062	Organismal Systems	Immune system	Chemokine signaling pathway	http://www.genome.jp/kegg-bin/show_pathway?ko04062+K04345+K03099+K07827+K04456+K03083+K00922+K02833+K04371+K21289+K06068+K04447+K04467+K05858+K04514+K04368+K04392+K17388+K04409+K04536	1407.67
ko04664	Organismal Systems	Immune system	Fc epsilon RI signaling pathway	http://www.genome.jp/kegg-bin/show_pathway?ko04664+K03099+K06276+K04430+K07827+K04456+K00922+K16342+K02833+K04371+K01116+K04368+K03084+K04392+K04431+K02677	757
ko04666	Organismal Systems	Immune system	Fc gamma R-mediated phagocytosis	http://www.genome.jp/kegg-bin/show_pathway?ko04666+K01115+K05757+K05756+K04456+K00922+K00889+K16342+K05743+K04371+K05755+K06068+K05765+K05768+K05758+K01116+K04368+K04688+K03084+K12561+K04392+K04718+K15909+K12559+K04409+K02677+K18050+K06478	1497.11
ko04660	Organismal Systems	Immune system	T cell receptor signaling pathway	http://www.genome.jp/kegg-bin/show_pathway?ko04660+K03099+K06276+K07827+K04456+K03083+K00922+K04427+K05733+K02833+K04371+K06268+K04348+K04467+K01116+K04368+K05856+K04431+K04409+K05734+K06478	1009.89
ko04662	Organismal Systems	Immune system	B cell receptor signaling pathway	http://www.genome.jp/kegg-bin/show_pathway?ko04662+K03099+K07827+K04456+K03083+K00922+K02833+K04371+K06268+K04348+K04467+K04368+K03084+K04392+K15909	835.333
ko04670	Organismal Systems	Immune system	Leukocyte transendothelial migration	http://www.genome.jp/kegg-bin/show_pathway?ko04670+K00922+K05692+K01116+K04514+K04392+K05702+K17388+K12757+K02677+K21421+K07293	330.889
ko04658	Organismal Systems	Immune system	Th1 and Th2 cell differentiation	http://www.genome.jp/kegg-bin/show_pathway?ko04658+K04371+K04447+K06268+K04348+K04467+K01116+K05856	268.667
ko04659	Organismal Systems	Immune system	Th17 cell differentiation	http://www.genome.jp/kegg-bin/show_pathway?ko04659+K04079+K07203+K04371+K04447+K06268+K04348+K04467+K01116+K05856	7408.89
ko04611	Organismal Systems	Immune system	Platelet activation	http://www.genome.jp/kegg-bin/show_pathway?ko04611+K03903+K07376+K04345+K06269+K04456+K00922+K16342+K06264+K04958+K04371+K05692+K21289+K00907+K03905+K05858+K06069+K04960+K19477+K04514+K06236+K17388+K06270+K12757+K01313+K03904	2809.11
ko04612	Organismal Systems	Immune system	Antigen processing and presentation	http://www.genome.jp/kegg-bin/show_pathway?ko04612+K04079+K03283+K09489+K01363+K01369+K01365+K01368+K08065+K08056+K08059+K08057	8282.56
ko04650	Organismal Systems	Immune system	Natural killer cell mediated cytotoxicity	http://www.genome.jp/kegg-bin/show_pathway?ko04650+K03099+K07827+K00922+K02833+K04371+K06268+K04348+K01116+K04368+K05856+K04392+K04409+K02677+K07293	534.333
ko04657	Organismal Systems	Immune system	IL-17 signaling pathway	http://www.genome.jp/kegg-bin/show_pathway?ko04657+K04079+K03083+K09848+K04427+K19603+K04371+K01394+K09487+K04464+K04467+K06855+K03175+K03174+K03173+K05410	7740
ko04640	Organismal Systems	Immune system	Hematopoietic cell lineage	http://www.genome.jp/kegg-bin/show_pathway?ko04640+K06468	13.1111
ko04610	Organismal Systems	Immune system	Complement and coagulation cascades	http://www.genome.jp/kegg-bin/show_pathway?ko04610+K03903+K03982+K04001+K01315+K04004+K03905+K03990+K01313+K04000+K03911+K03984+K01333+K03904	41.5556
ko04621	Organismal Systems	Immune system	NOD-like receptor signaling pathway	http://www.genome.jp/kegg-bin/show_pathway?ko04621+K04079+K03671+K02406+K01363+K08339+K15040+K06630+K20899+K04427+K08341+K04958+K04371+K08847+K12795+K06068+K03462+K04733+K04467+K05858+K04960+K03175+K20876+K17065+K03174+K03173+K10165+K05410+K21421	11306.4
ko04620	Organismal Systems	Immune system	Toll-like receptor signaling pathway	http://www.genome.jp/kegg-bin/show_pathway?ko04620+K04430+K04456+K00922+K04427+K04371+K04733+K04467+K04368+K03175+K04392+K01371+K04431+K03174+K05401+K05410+K04730	478
ko04623	Organismal Systems	Immune system	Cytosolic DNA-sensing pathway	http://www.genome.jp/kegg-bin/show_pathway?ko04623+K03013+K03021+K08847+K03018+K03027+K03016+K04467+K03026+K03014+K03007+K14721+K05410	125.222
ko04622	Organismal Systems	Immune system	RIG-I-like receptor signaling pathway	http://www.genome.jp/kegg-bin/show_pathway?ko04622+K00863+K08339+K04427+K11594+K12655+K04467+K03175+K12647+K03174+K03173+K05410	149.444
ko04625	Organismal Systems	Immune system	C-type lectin receptor signaling pathway	http://www.genome.jp/kegg-bin/show_pathway?ko04625+K07830+K02183+K07827+K04456+K00922+K02833+K04958+K04371+K06068+K07829+K06268+K04348+K04467+K04960+K06563+K04409+K08862+K10059+K07293	1237.78
ko04624	Organismal Systems	Immune system	Toll and Imd signaling pathway	http://www.genome.jp/kegg-bin/show_pathway?ko04624+K06689+K10580+K04427+K10380+K04733+K03362+K20698+K10704+K04431+K04730	338.889
ko04730	Organismal Systems	Nervous system	Long-term depression	http://www.genome.jp/kegg-bin/show_pathway?ko04730+K07376+K07827+K16342+K02833+K04958+K04371+K03456+K04382+K05858+K04960+K19477+K04368+K04578+K02677+K04961	1635.44
ko04728	Organismal Systems	Nervous system	Dopaminergic synapse	http://www.genome.jp/kegg-bin/show_pathway?ko04728+K04345+K02183+K06269+K04456+K11583+K03083+K04958+K10396+K04354+K04348+K03456+K04382+K05858+K04960+K11584+K04515+K02677+K04851+K04536+K00274	2991.44
ko04724	Organismal Systems	Nervous system	Glutamatergic synapse	http://www.genome.jp/kegg-bin/show_pathway?ko04724+K01915+K01115+K04345+K01425+K16342+K04958+K04371+K06268+K04348+K05858+K04960+K14207+K02677+K04851+K04536	15270.8
ko04725	Organismal Systems	Nervous system	Cholinergic synapse	http://www.genome.jp/kegg-bin/show_pathway?ko04725+K04345+K01049+K07827+K04456+K00922+K02833+K04958+K04371+K21289+K04447+K05858+K04960+K04368+K05869+K04515+K02677+K04851+K04853+K04536	1276.78
ko04726	Organismal Systems	Nervous system	Serotonergic synapse	http://www.genome.jp/kegg-bin/show_pathway?ko04726+K04345+K07827+K16342+K02833+K04958+K04371+K05858+K04960+K04368+K21278+K02677+K04851+K04853+K04536+K00274	1018.67
ko04727	Organismal Systems	Nervous system	GABAergic synapse	http://www.genome.jp/kegg-bin/show_pathway?ko04727+K01915+K04345+K05044+K01425+K06027+K08341+K01580+K05046+K14207+K15376+K02677+K05185+K04851+K04853+K04536+K14992	14819.8
ko04720	Organismal Systems	Nervous system	Long-term potentiation	http://www.genome.jp/kegg-bin/show_pathway?ko04720+K04345+K02183+K06269+K07827+K02833+K04958+K04371+K04373+K06268+K04348+K05858+K04960+K04368+K05869+K04515+K02677	2215.78
ko04721	Organismal Systems	Nervous system	Synaptic vesicle cycle	http://www.genome.jp/kegg-bin/show_pathway?ko04721+K04646+K02154+K05044+K02145+K06027+K02155+K15292+K08486+K15296+K02150+K02146+K11827+K02151+K05046+K04560+K03661+K11824+K11826+K02144+K11825+K02149+K02147+K15290+K02148+K05038	1149.44
ko04722	Organismal Systems	Nervous system	Neurotrophin signaling pathway	http://www.genome.jp/kegg-bin/show_pathway?ko04722+K04421+K03099+K06276+K02183+K07827+K06630+K04456+K03083+K00922+K02833+K04371+K04445+K04373+K06068+K04464+K04733+K01116+K04368+K03175+K04392+K05869+K04426+K04515+K04431+K07293+K04730	1960
ko04723	Organismal Systems	Nervous system	Retrograde endocannabinoid signaling	http://www.genome.jp/kegg-bin/show_pathway?ko04723+K04345+K04958+K04371+K03878+K03884+K03879+K03883+K03943+K05858+K04960+K13985+K03936+K02677+K05185+K01054+K04851+K04853+K04536	1143.22
ko04742	Organismal Systems	Sensory system	Taste transduction	http://www.genome.jp/kegg-bin/show_pathway?ko04742+K13755+K04345+K04960+K04834	793.667
ko04740	Organismal Systems	Sensory system	Olfactory transduction	http://www.genome.jp/kegg-bin/show_pathway?ko04740+K13755+K07376+K04345+K02183+K19477+K04515+K04536+K05849	2173.78
ko04744	Organismal Systems	Sensory system	Phototransduction	http://www.genome.jp/kegg-bin/show_pathway?ko04744+K02183+K04536	544.444
ko04745	Organismal Systems	Sensory system	Phototransduction - fly	http://www.genome.jp/kegg-bin/show_pathway?ko04745+K02183+K04958+K05692+K05858+K08834+K04515+K02677	765.222
ko04750	Organismal Systems	Sensory system	Inflammatory mediator regulation of TRP channels	http://www.genome.jp/kegg-bin/show_pathway?ko04750+K04345+K02183+K06269+K18051+K00922+K16342+K04958+K06068+K05858+K04960+K01116+K04984+K04515+K02677+K18050	1943.44
