# Supplementary material
Source: MDPI journal article supplement (https://www.mdpi.com/2311-5637/8/5/240)
Supplement: s1 [file s1 › Supplementary Table S4.xlsx]

## Sheet: Sheet1
Supplementary Table S4: 511 genes encoding CAZymes in this study
Family	Family_Description	Class	Class_Description		Mean
AA1	Laccase / p-diphenol:oxygen oxidoreductase / ferroxidase (EC 1.10.3.2); ; ferroxidase (EC 1.10.3.-); Laccase-like multicopper oxidase (EC 1.10.3.-)	AA	Auxiliary Activities		29
AA11	AA11 proteins are copper-dependent lytic polysaccharide monooxygenases (LPMOs); cleavage of chitin chains with oxidation of C-1 has been demonstrated for a AA11 LPMO from Aspergillus oryzae;	AA	Auxiliary Activities		3
AA12	The pyrroloquinoline quinone-dependent oxidoreductase activity was demonstrated for the CC1G_09525 protein of Coprinopsis cinerea.	AA	Auxiliary Activities		4
AA15	lytic cellulose monooxygenase (C1-hydroxylating) (EC 1.14.99.54); lytic chitin monooxygenase (EC 1.14.99.53)				20
AA1_1	AA1's subfamily	AA	Auxiliary Activities		1
AA1_2	AA1's subfamily	AA	Auxiliary Activities		1
AA2	manganese peroxidase (EC 1.11.1.13); versatile peroxidase (EC 1.11.1.16); lignin peroxidase (EC 1.11.1.14); peroxidase (EC 1.11.1.-)	AA	Auxiliary Activities		23
AA3	cellobiose dehydrogenase (EC 1.1.99.18); glucose 1-oxidase (EC 1.1.3.4); aryl alcohol oxidase (EC 1.1.3.7); alcohol oxidase (EC 1.1.3.13); pyranose oxidase (EC 1.1.3.10)	AA	Auxiliary Activities		2089
AA3_1	AA3's subfamily	AA	Auxiliary Activities		892
AA3_2	AA3's subfamily	AA	Auxiliary Activities		356
AA3_3	AA3's subfamily	AA	Auxiliary Activities		0
AA3_4	AA3's subfamily	AA	Auxiliary Activities		54
AA4	vanillyl-alcohol oxidase (EC 1.1.3.38)	AA	Auxiliary Activities		759
AA5	Oxidase with oxygen as acceptor (EC 1.1.3.-); galactose oxidase (EC 1.1.3.9); glyoxal oxidase (EC 1.2.3.15); alcohol oxidase (EC 1.1.3.13)	AA	Auxiliary Activities		1740
AA5_2	AA5's subfamily	AA	Auxiliary Activities		40
AA6	1,4-benzoquinone reductase (EC. 1.6.5.6)	AA	Auxiliary Activities		11885
AA7	glucooligosaccharide oxidase (EC 1.1.3.-); chitooligosaccharide oxidase (EC 1.1.3.-)	AA	Auxiliary Activities		779
AA8	Iron reductase domain	AA	Auxiliary Activities		164
CBM11	Modules of approx. 180-200 residues. The CBM11 of Clotridium thermocellum Cel26A-Cel5E has been shown to bind both beta-1,4-glucan and beta-1,3-1,4-mixed linked glucans.	CBM	Carbohydrate-Binding Modules		146
CBM12	Modules of approx. 40-60 residues. The majority of these modules is found among chitinases where the function is chitin-binding. Distantly related to the CBM5 family.	CBM	Carbohydrate-Binding Modules		6
CBM13	Modules of approx. 150 residues which always appear as a threefold internal repeat. The only apparent exception to this, xylanase II of Actinomadura sp. FC7 (GenBank U08894), is in fact not completely sequenced. These modules were first identified in several plant lectins such as ricin or agglutinin of Ricinus communis which bind galactose residues. The three-dimensional structure of a plant lect…	CBM	Carbohydrate-Binding Modules		1184
CBM16	Carbohydrate-binding module 16. Binding to cellulose and glucomannan demonstrated [B. Bae et al (2008) J Biol Chem. 283:12415-25 (PMID: 18025086)]	CBM	Carbohydrate-Binding Modules		854
CBM2	Modules of approx. 100 residues and which are found in a large number of bacterial enzymes. The cellulose-binding function has been demonstrated in many cases. Several of these modules have been shown to also bind chitin or xylan.	CBM	Carbohydrate-Binding Modules		115
CBM20	The granular starch-binding function has been demonstrated in several cases. Interact strongly with cyclodextrins. Often designated as starch-binding domains (SBD).	CBM	Carbohydrate-Binding Modules		847
CBM21	Modules of approx. 100 residues. The granular starch-binding function has been demonstrated in one case. Sometimes designated as starch-binding domains (SBD).	CBM	Carbohydrate-Binding Modules		10
CBM22	A xylan binding function has been demonstrated in several cases and affinity with mixed beta-1,3/beta-1,4-glucans in one. In several cases a thermostabilizing effect has also been seen.	CBM	Carbohydrate-Binding Modules		668
CBM23	Mannan-binding function demonstrated in one case.	CBM	Carbohydrate-Binding Modules		33
CBM25	Starch-binding function demonstrated in one case.	CBM	Carbohydrate-Binding Modules		13
CBM26	Starch-binding function demonstrated in two cases.	CBM	Carbohydrate-Binding Modules		617
CBM27	Mannan-binding function demonstrated in two cases	CBM	Carbohydrate-Binding Modules		0
CBM3	Modules of approx. 150 residues found in bacterial enzymes. The cellulose-binding function has been demonstrated in many cases. In one instance binding to chitin has been reported.	CBM	Carbohydrate-Binding Modules		69
CBM30	Binding to cellulose has been demonstrated for the N-terminal module of Fibrobacter succinogenes CelF.	CBM	Carbohydrate-Binding Modules		123
CBM31	Binding to beta-1,3-xylan has been demonstrated for the C-terminal module of the beta-1,3-xylanase of Alcaligenes sp. XY234.	CBM	Carbohydrate-Binding Modules		3
CBM32	Binding to galactose and lactose has been demonstrated for the module of Micromonospora viridifaciens sialidase (PMID: 16239725). Binding to polygalacturonic acid has been shown for a Yersinia member (PMID: 17292916). Binding to LacNAc (beta-D-galactosyl-1,4-beta-D-N-acetylglucosamine) has been shown for an N-acetylglucosaminidase from Clostridium perfingens (PMID: 16990278).	CBM	Carbohydrate-Binding Modules		4677
CBM34	Modules of approx. 120 residues. Granular starch-binding function has been demonstrated in the case of Thermoactinomyces vulgaris R-47 -amylase 1 (TVAI).	CBM	Carbohydrate-Binding Modules		476
CBM35	Modules of approx. 130 residues. A module that is conserved in three Cellvibrio xylan-degrading enzymes binds to xylan and the interaction is calcium dependent, while a module from a Cellvibrio mannanase binds to decorated soluble mannans and mannooligosaccharides. A module in a	CBM	Carbohydrate-Binding Modules		1229
CBM36	Modules of approx. 120-130 residues displaying structural similarities to CBM6 modules. The only CBM36 currently characterised, that from Paenbacillus polymyxa xylanase 43A, shows calcium-dependent binding of xylans and xylooligosaccharides. X-ray crystallography shows that there is a direct interaction between calcium and ligand.	CBM	Carbohydrate-Binding Modules		65
CBM37	Modules of approx. 100 residues, conserved in numerous R. albus polysaccharide-degrading enzymes and other proteins from this bacterium. Several members of CBM37 have been shown to exhibit rather broad binding specificity to xylan, chitin, microcrystalline and phosphoric-acid swollen cellulose, as well as more heterogeneous substrates, such as alfalfa cell walls, banana stem and wheat straw.	CBM	Carbohydrate-Binding Modules		625
CBM38	The inulin-binding function has been demonstrated in the case of the cycloinulo-oligosaccharide fructanotransferase from Paenibacillus macerans (Bacillus macerans) by Lee et al. (2004) FEMS Microbiol Lett 234:105-10. (PMID:15109727).	CBM	Carbohydrate-Binding Modules		235
CBM39	Modules generally found at the N-terminus of a GH16 module (itself frequently lacking a catalytic machinery) and more seldomly in isolation. The beta-1,3-glucan binding function has been demonstrated, along with binding to lipopolysaccharide and lipoteichoic acid.	CBM	Carbohydrate-Binding Modules		2
CBM4	Modules of approx. 150 residues found in bacterial enzymes. Binding of these modules has been demonstrated with xylan, beta-1,3-glucan, beta-1,3-1,4-glucan, beta-1,6-glucan and amorphous cellulose but not with crystalline cellulose.	CBM	Carbohydrate-Binding Modules		1225
CBM40	Modules of approx. 200 residues, found at the N-terminus of GH33 sialidases. Can also be found inserted in the beta-propeller of GH33 sialidases. The sialic acid binding function has been demonstrated for the N-terminal CBM40 of Vibrio cholerae sialidase (Moustafa et al. (2004) J Biol Chem 279:40819-26) (PMID: 15226294).	CBM	Carbohydrate-Binding Modules		595
CBM41	Modules of approx. 100 residues found in primarily in bacterial pullulanases. The N-terminal module from Thermotoga maritima Pul13 has been shown to bind to the alpha-glucans amylose, amylopectin, pullulan, and oligosaccharide fragments derived from these polysaccharides (Lammerts van Bueren et al. (2004) Biochemistry 43:15633-42) (PMID: 15581376).	CBM	Carbohydrate-Binding Modules		114
CBM42	Modules of approx. 160 residues found mostly at the C-terminus of GH54 catalytic domains. Binding to arabinofuranose (present in arabinoxylan) has been demonstrated.	CBM	Carbohydrate-Binding Modules		5
CBM44	The C-terminal CBM44 module of the Clostridium thermocellum enzyme has been demonstrated to bind equally well cellulose and xyloglucan	CBM	Carbohydrate-Binding Modules		178
CBM45	Modules of approx. 100 residues, found at the N-terminus of plastidial alpha-amylases and of alpha-glucan, water dikinases. Starch-binding activity demonstrated in the case of potato alpha-glucan, water dikinase.	CBM	Carbohydrate-Binding Modules		47
CBM46	Modules of approx. 100 residues, found at the C-terminus of several GH5 cellulases. Cellulose-binding function demonstrated in one case.	CBM	Carbohydrate-Binding Modules		37
CBM47	Modules of approx 150 residues. Fucose-binding activity demonstrated	CBM	Carbohydrate-Binding Modules		25
CBM48	Modules of approx. 100 residues with glycogen-binding function, appended to GH13 modules. Also found in the beta subunit (glycogen-binding) of AMP-activated protein kinases (AMPK)	CBM	Carbohydrate-Binding Modules		2071
CBM49	Modules of approx. 100 residues found at the C-terminus of plant GH9 enzymes. Distantly related to CBM2 modules. Binding to crystalline cellulose demonstrated in the case of Solanum lycopersicum Cel8 enzyme (SlCel9C1).	CBM	Carbohydrate-Binding Modules		1
CBM5	Modules of approx. 60 residues found in bacterial enzymes. Chitin-binding described in several cases. Distantly related to the CBM12 family.	CBM	Carbohydrate-Binding Modules		3
CBM50	Modules of approx. 50 residues found attached to various enzymes from families GH18, GH19, GH23, GH24, GH25 and GH73, i.e. enzymes cleaving either chitin or peptidoglycan. Binding to chitopentaose demonstrated in the case of Pteris ryukyuensis chitinase A [Ohnuma T et al. (2008) J. Biol. Chem. 283:5178-87 (PMID: 18083709)]. CBM50 modules are also found in a multitude of other enzymes targeting th…	CBM	Carbohydrate-Binding Modules		1371
CBM51	Modules of approx. 150 residues found attached to various enzymes from families GH2, GH27, GH31, GH95, GH98 and GH101 . Binding to galactose and to blood group A/B-antigens demonstrated in the case of C. perfringens GH95CBM51 and GH98CBM51 respectively [Gregg KJ et al. (2008) J. Biol. Chem. 283:12604-13 PMID: 18292090].	CBM	Carbohydrate-Binding Modules		305
CBM53	Starch-binding function demonstrated by Valdez et al. (2008) [PMID: 18260645]	CBM	Carbohydrate-Binding Modules		3
CBM54	Binding to xylan, yeast cell wall glucan and chitin shown in Dvortsov et al., Microbiology UK (2009) in press.	CBM	Carbohydrate-Binding Modules		14
CBM56	beta-1,3-glucan binding function demonstrated by Yamamoto et al. (1998) FEBS Letters 433:41-43 [PMID: 9738929]	CBM	Carbohydrate-Binding Modules		1103
CBM57	Created from reading Schallus et al (2008) Mol Biol Cell. 19:3404-3414 [PMID: 18524852] and finding related domains attached to various glycosidases.	CBM	Carbohydrate-Binding Modules		278
CBM58	The CBM58 module of the Bacteroides thetaiotaomicron SusG protein has been shown to bind maltoheptaose	CBM	Carbohydrate-Binding Modules		54
CBM59	Binding to mannan, xylan, and cellulose demonstrated for the CBM59 of ManF-X10 xylanase from an environmental genomic DNA library (Li et al. (2009) World Journal of Microbiology and Biotechnology 25:2071-2078; doi:10.1007/s11274-009-0111-6)	CBM	Carbohydrate-Binding Modules		3
CBM6	Modules of approx. 120 residues. The cellulose-binding function has been demonstrated in one case on amorphous cellulose and beta-1,4-xylan. Some of these modules also bind beta-1,3-glucan, beta-1,3-1,4-glucan, and beta-1,4-glucan.	CBM	Carbohydrate-Binding Modules		2244
CBM61	Modules of approx. 150 residues found appended to GH16, GH30, GH31, GH43, GH53 and GH66 catalytic domains. A beta-1,4-galactan binding function has been demonstrated for the CBM61 of Thermotoga maritima GH53 galactanase [PMID: 20826814].	CBM	Carbohydrate-Binding Modules		1454
CBM62	The CBM62 module of Clostridium thermocellum Cthe_2193 protein binds galactose moieties found on xyloglucan, arabinogalactan and galactomannan.	CBM	Carbohydrate-Binding Modules		462
CBM63	The CBM63 module of Bacillus subtilis expansin EXLX1 has been shown to bind cellulose.	CBM	Carbohydrate-Binding Modules		28
CBM65	CBM65A and CBM65B, derived from Eubacterium cellulosolvens endoglucanase EcCel5A, bind to a range of beta-glucans but, uniquely, display significant preference for xyloglucan	CBM	Carbohydrate-Binding Modules		4
CBM66	The CBM66 module, derived from the Bacillus subtilis exo-acting beta-fructosidase SacC, targets the terminal fructoside residue of fructans.	CBM	Carbohydrate-Binding Modules		1679
CBM67	Fujimoto et al. [PMID : 23486481] disclosed the L-rhamnose binding activity and 3-D structure of the CBM67 of Streptomyces avermitilis alpha-L-rhamnosidase (SaRha78A);	CBM	Carbohydrate-Binding Modules		4305
CBM68	Binding to maltotriose and maltotetraose shown for the pullulanase of Anoxybacillus sp. LM18-11. Binding function derived from crystal structure and deletion of the CBM, which showed reduced specific activity and increased Km value compared to the wild type enzyme.	CBM	Carbohydrate-Binding Modules		13
CBM69	starch-binding function demonstrated in one case; distantly related to families CBM20 and CBM48	CBM	Carbohydrate-Binding Modules		64
CBM70	The hyaluronan-specific binding function of the N-terminal CBM70 module of Streptococcus pneumoniae hyaluronate lyase has been demonstrated.	CBM	Carbohydrate-Binding Modules		19
CBM72	Modules of 130-180 residues found at the C-terminus glycoside hydrolases from various families, sometimes as tandem repeats. The CBM72 found on an endoglucanase from an uncultivated microorganism was found to bind a broad spectrum of polysaccharides including soluble and insoluble cellulose, beta-1,3/1,4-mixed linked glucans, xylan, and beta-mannan [PMID=26765840].	CBM	Carbohydrate-Binding Modules		210
CBM74	Modules of approx. 300 residues appended to several alpha-amylases. The starch-binding function has been demonstrated for the CBM74 appended to the GH13 alpha-amylase of Microbacterium aureum B8.A	CBM	Carbohydrate-Binding Modules		70
CBM75	Modules of 290 residues appended to GH43_16 enzymes. So far found exclusively in Ruminococci. The xyloglucan-binding function was demonstrated for the R. flavefaciens protein.	CBM	Carbohydrate-Binding Modules		4
CBM76	Modules of approx. 170 residues appended to GH44 enzymes. So far found exclusively in Ruminococci. Broad specificity binding to beta-glucans demontsrated for the R. flavefaciens module, which binds xyloglucan, glucomannan, and barley beta-glucan.	CBM	Carbohydrate-Binding Modules		16
CBM77	Pectin binding modules of approx. 110 residues. The Ruminococcus flavefaciens CBM77 was shown to bind various pectins of low degree of esterification.	CBM	Carbohydrate-Binding Modules		107
CBM78	Modules of approx. 150 residues appended to the C-terminus of GH5 and GH26 enzymes. So far found exclusively in Ruminococcal enzymes. The R. flavefaciens module has been shown to bind decorated beta-1,4-glucans with a preference for xyloglucan.	CBM	Carbohydrate-Binding Modules		8
CBM79	Modules of approx. 130 residues found so far only in ruminococcal proteins. Binding to various beta-glucans was shown for the R. flavefaciens GH9 enzyme.	CBM	Carbohydrate-Binding Modules		171
CBM8	The cellulose-binding module from a cellulase of the slime mold Dictyostelium discoideum has been experimentally shown to bind cellulose.	CBM	Carbohydrate-Binding Modules		21
CBM80	Modules of approx. 90 residues found so far only in ruminococcal enzymes of families GH5 or GH26. Broad specificity for beta-glycans (xyloglucan, glucomannan, galactomannan, barley beta-glucan).	CBM	Carbohydrate-Binding Modules		8
CBM82	The boundaries, structure and starch-binding function of the CBM82 module of Eubacterium rectale Amy13K have been reported by Cockburn and coworkers in Molec. Microbiol. (2017) (PMID=29139580)				0
CBM84	Modules of approx. 140 aminoacids appended to enzymes of different families of CAZymes. A xanthan-binding function was reported for the GH9 xanthanase of Paenibacillus nanensis by Moroz et al. ACS Catal., 2018, 8 (7), pp 6021-6034.				40
CBM9	Modules of approx. 170 residues found so far only in xylanases. The cellulose-binding function has been demonstrated in one case.	CBM	Carbohydrate-Binding Modules		1846
CE1	acetyl xylan esterase (EC 3.1.1.72); cinnamoyl esterase (EC 3.1.1.-); feruloyl esterase (EC 3.1.1.73); carboxylesterase (EC 3.1.1.1); S-formylglutathione hydrolase (EC 3.1.2.12); diacylglycerol O-acyltransferase (EC 2.3.1.20); trehalose 6-O-mycolyltransferase (EC 2.3.1.122)	CE	Carbohydrate Esterases		42701
CE10	arylesterase (EC 3.1.1.-); carboxyl esterase (EC 3.1.1.3); acetylcholinesterase (EC 3.1.1.7); cholinesterase (EC 3.1.1.8); sterol esterase (EC 3.1.1.13); brefeldin A esterase (EC 3.1.1.-).	CE	Carbohydrate Esterases		35288
CE11	UDP-3-0-acyl N-acetylglucosamine deacetylase (EC 3.5.1.108).	CE	Carbohydrate Esterases		2537
CE12	pectin acetylesterase (EC 3.1.1.-); rhamnogalacturonan acetylesterase (EC 3.1.1.-); acetyl xylan esterase (EC 3.1.1.72)	CE	Carbohydrate Esterases		6228
CE13	pectin acetylesterase (EC 3.1.1.-)	CE	Carbohydrate Esterases		640
CE14	N-acetyl-1-D-myo-inosityl-2-amino-2-deoxy-alpha-D-glucopyranoside deacetylase (EC 3.5.1.89); diacetylchitobiose deacetylase (EC 3.5.1.-); mycothiol S-conjugate amidase (EC 3.5.1.-)	CE	Carbohydrate Esterases		2094
CE15	4-O-methyl-glucuronoyl methylesterase (EC 3.1.1.-)	CE	Carbohydrate Esterases		4593
CE16	acetylesterase (EC 3.1.1.6) active on various carbohydrate acetyl esters	CE	Carbohydrate Esterases		8
CE2	acetyl xylan esterase (EC 3.1.1.72).	CE	Carbohydrate Esterases		5372
CE3	acetyl xylan esterase (EC 3.1.1.72).	CE	Carbohydrate Esterases		7499
CE4	acetyl xylan esterase (EC 3.1.1.72); chitin deacetylase (EC 3.5.1.41); chitooligosaccharide deacetylase (EC 3.5.1.-); peptidoglycan GlcNAc deacetylase (EC 3.5.1.-); peptidoglycan N-acetylmuramic acid deacetylase (EC 3.5.1.-).	CE	Carbohydrate Esterases		7120
CE5	acetyl xylan esterase (EC 3.1.1.72); cutinase (EC 3.1.1.74)	CE	Carbohydrate Esterases		95
CE6	acetyl xylan esterase (EC 3.1.1.72).	CE	Carbohydrate Esterases		1735
CE7	acetyl xylan esterase (EC 3.1.1.72); cephalosporin-C deacetylase (EC 3.1.1.41).	CE	Carbohydrate Esterases		8032
CE8	pectin methylesterase (EC 3.1.1.11).	CE	Carbohydrate Esterases		5827
CE9	N-acetylglucosamine 6-phosphate deacetylase (EC 3.5.1.25); N-acetylglucosamine 6-phosphate deacetylase (EC 3.5.1.80)	CE	Carbohydrate Esterases		6174
GH1	beta-glucosidase (EC 3.2.1.21); beta-galactosidase (EC 3.2.1.23); beta-mannosidase (EC 3.2.1.25); beta-glucuronidase (EC 3.2.1.31); beta-xylosidase (EC 3.2.1.37); beta-D-fucosidase (EC 3.2.1.38); phlorizin hydrolase (EC 3.2.1.62); exo-beta-1,4-glucanase (EC 3.2.1.74); 6-phospho-beta-galactosidase (EC 3.2.1.85); 6-phospho-beta-glucosidase (EC 3.2.1.86); strictosidine beta-glucosidase (EC 3.2.1.105…	GH	Glycoside Hydrolases		2473
GH10	endo-1,4-beta-xylanase (EC 3.2.1.8); endo-1,3-beta-xylanase (EC 3.2.1.32); tomatinase (EC 3.2.1.-); xylan endotransglycosylase (EC 2.4.2.-); endo-beta-1,4-glucanase (EC 3.2.1.4)	GH	Glycoside Hydrolases		7856
GH100	alkaline and neutral invertase (EC 3.2.1.26)	GH	Glycoside Hydrolases		46
GH101	endo-alpha-N-acetylgalactosaminidase (EC 3.2.1.97)	GH	Glycoside Hydrolases		30
GH102	peptidoglycan lytic transglycosylase (EC 3.2.1.-)	GH	Glycoside Hydrolases		20
GH103	peptidoglycan lytic transglycosylase (EC 3.2.1.-)	GH	Glycoside Hydrolases		43
GH104	peptidoglycan lytic transglycosylase (EC 3.2.1.-)	GH	Glycoside Hydrolases		13
GH105	unsaturated rhamnogalacturonyl hydrolase (EC 3.2.1.172); d-4,5-unsaturated beta-glucuronyl hydrolase (EC 3.2.1.-); d-4,5-unsaturated alpha-galacturonidase (EC 3.2.1.-)	GH	Glycoside Hydrolases		6643
GH106	alpha-L-rhamnosidase (EC 3.2.1.40); rhamnogalacturonan alpha-L-rhamnohydrolase (EC 3.2.1.174)	GH	Glycoside Hydrolases		15962
GH107	sulfated fucan endo-1,4-fucanase (EC 3.2.1.-)	GH	Glycoside Hydrolases		34
GH108	N-acetylmuramidase (EC 3.2.1.17)	GH	Glycoside Hydrolases		123
GH109	alpha-N-acetylgalactosaminidase (EC 3.2.1.49)	GH	Glycoside Hydrolases		11315
GH11	endo-beta-1,4-xylanase (EC 3.2.1.8); endo-beta-1,3-xylanase (EC 3.2.1.32)	GH	Glycoside Hydrolases		718
GH110	alpha-galactosidase (EC 3.2.1.22); alpha-1,3-galactosidase (EC 3.2.1.-)	GH	Glycoside Hydrolases		678
GH111	keratan sulfate hydrolase (endo-beta-N-acetylglucosaminidase) (EC 3.2.1.-)	GH	Glycoside Hydrolases		6
GH112	lacto-N-biose phosphorylase or galacto-N-biose phosphorylase (EC 2.4.1.211); D-galactosyl-beta-1,4-L-rhamnose phosphorylase (EC 2.4.1.247); galacto-N-biose/lacto-N-biose phosphorylase (EC 2.4.1.-)	GH	Glycoside Hydrolases		612
GH113	beta-mannanase (EC 3.2.1.78)	GH	Glycoside Hydrolases		364
GH114	endo-alpha-1,4-polygalactosaminidase (EC 3.2.1.109)	GH	Glycoside Hydrolases		264
GH115	xylan alpha-1,2-glucuronidase (3.2.1.131); alpha-(4-O-methyl)-glucuronidase (3.2.1.-)	GH	Glycoside Hydrolases		7303
GH116	beta-glucosidase (EC 3.2.1.21); beta-xylosidase (EC 3.2.1.37); acid beta-glucosidase/beta-glucosylceramidase (EC 3.2.1.45); beta-N-acetylglucosaminidase (EC 3.2.1.52)	GH	Glycoside Hydrolases		603
GH117	alpha-1,3-L-neoagarooligosaccharide hydrolase (EC 3.2.1.-); alpha-1,3-L-neoagarobiase / neoagarobiose hydrolase (EC 3.2.1.-)	GH	Glycoside Hydrolases		114
GH118	beta-agarase (EC 3.2.1.81)	GH	Glycoside Hydrolases		19
GH119	alpha-amylase (EC 3.2.1.1)	GH	Glycoside Hydrolases		1178
GH120	beta-xylosidase (EC 3.2.1.37)	GH	Glycoside Hydrolases		258
GH121	beta-L-arabinobiosidase (EC 3.2.1.-)	GH	Glycoside Hydrolases		279
GH123	beta-N-acetylgalactosaminidase (EC 3.2.1.53); glycosphingolipid beta-N-acetylgalactosaminidase (EC 3.2.1.-)	GH	Glycoside Hydrolases		1288
GH124	endoglucanase (EC 3.2.1.4)	GH	Glycoside Hydrolases		388
GH125	exo-alpha-1,6-mannosidase (EC 3.2.1.-)	GH	Glycoside Hydrolases		3030
GH126	alpha-amylase (EC 3.2.1.-)	GH	Glycoside Hydrolases		82
GH127	beta-L-arabinofuranosidase (EC 3.2.1.185); 3-C-carboxy-5-deoxy-L-xylose (aceric acid) hydrolase (EC 3.2.1.-)	GH	Glycoside Hydrolases		7836
GH128	beta-1,3-glucanase (EC 3.2.1.39)	GH	Glycoside Hydrolases		300
GH129	alpha-N-acetylgalactosaminidase (EC 3.2.1.49);	GH	Glycoside Hydrolases		716
GH13	alpha-amylase (EC 3.2.1.1); pullulanase (EC 3.2.1.41); cyclomaltodextrin glucanotransferase (EC 2.4.1.19); cyclomaltodextrinase (EC 3.2.1.54); trehalose-6-phosphate hydrolase (EC 3.2.1.93); oligo-alpha-glucosidase (EC 3.2.1.10); maltogenic amylase (EC 3.2.1.133); neopullulanase (EC 3.2.1.135); alpha-glucosidase (EC 3.2.1.20); maltotetraose-forming alpha-amylase (EC 3.2.1.60); isoamylase (EC 3.2.1…	GH	Glycoside Hydrolases		6835
GH130	beta-1,4-mannosylglucose phosphorylase (EC 2.4.1.281); beta-1,4-mannooligosaccharide phosphorylase (EC 2.4.1.319); beta-1,4-mannosyl-N-acetyl-glucosamine phosphorylase (EC 2.4.1.320); beta-1,2-mannobiose phosphorylase (EC 2.4.1.-); beta-1,2-oligomannan phosphorylase (EC 2.4.1.-); beta-1,2-mannosidase (EC 3.2.1.-)	GH	Glycoside Hydrolases		4541
GH133	amylo-alpha-1,6-glucosidase (EC 3.2.1.33);	GH	Glycoside Hydrolases		2793
GH134	endo-beta-1,4-mannanase (EC 3.2.1.78);	GH	Glycoside Hydrolases		4
GH135	alpha-1,4-galactosaminogalactan hydrolase (EC 3.2.1.-)	GH	Glycoside Hydrolases		2
GH136	lacto-N-biosidase (EC 3.2.1.140)	GH	Glycoside Hydrolases		648
GH137	beta-L-arabinofuranosidase (EC 3.2.1.185)	GH	Glycoside Hydrolases		442
GH138	alpha-galacturonidase (EC 3.2.1.-)	GH	Glycoside Hydrolases		1156
GH139	alpha-2-O-Me-L-fucosidase (EC 3.2.1.-)	GH	Glycoside Hydrolases		1042
GH13_1	GH13's subfamily	GH	Glycoside Hydrolases		351
GH13_10	GH13's subfamily	GH	Glycoside Hydrolases		149
GH13_11	GH13's subfamily	GH	Glycoside Hydrolases		776
GH13_12	GH13's subfamily	GH	Glycoside Hydrolases		7
GH13_13	GH13's subfamily	GH	Glycoside Hydrolases		79
GH13_14	GH13's subfamily	GH	Glycoside Hydrolases		2413
GH13_15	GH13's subfamily	GH	Glycoside Hydrolases		30
GH13_16	GH13's subfamily	GH	Glycoside Hydrolases		59
GH13_18	GH13's subfamily	GH	Glycoside Hydrolases		238
GH13_19	GH13's subfamily	GH	Glycoside Hydrolases		178
GH13_2	GH13's subfamily	GH	Glycoside Hydrolases		427
GH13_20	GH13's subfamily	GH	Glycoside Hydrolases		1601
GH13_21	GH13's subfamily	GH	Glycoside Hydrolases		272
GH13_23	GH13's subfamily	GH	Glycoside Hydrolases		252
GH13_24	GH13's subfamily	GH	Glycoside Hydrolases		34
GH13_25	GH13's subfamily	GH	Glycoside Hydrolases		55
GH13_26	GH13's subfamily	GH	Glycoside Hydrolases		1
GH13_27	GH13's subfamily	GH	Glycoside Hydrolases		1
GH13_28	GH13's subfamily	GH	Glycoside Hydrolases		346
GH13_29	GH13's subfamily	GH	Glycoside Hydrolases		360
GH13_3	GH13's subfamily	GH	Glycoside Hydrolases		391
GH13_30	GH13's subfamily	GH	Glycoside Hydrolases		21
GH13_31	GH13's subfamily	GH	Glycoside Hydrolases		2157
GH13_32	GH13's subfamily	GH	Glycoside Hydrolases		110
GH13_33	GH13's subfamily	GH	Glycoside Hydrolases		2
GH13_36	GH13's subfamily	GH	Glycoside Hydrolases		3805
GH13_37	GH13's subfamily	GH	Glycoside Hydrolases		163
GH13_38	GH13's subfamily	GH	Glycoside Hydrolases		3232
GH13_39	GH13's subfamily	GH	Glycoside Hydrolases		2457
GH13_4	GH13's subfamily	GH	Glycoside Hydrolases		1788
GH13_40	GH13's subfamily	GH	Glycoside Hydrolases		25
GH13_41	GH13's subfamily	GH	Glycoside Hydrolases		70
GH13_42	GH13's subfamily	GH	Glycoside Hydrolases		536
GH13_5	GH13's subfamily	GH	Glycoside Hydrolases		710
GH13_6	GH13's subfamily	GH	Glycoside Hydrolases		1761
GH13_7	GH13's subfamily	GH	Glycoside Hydrolases		526
GH13_8	GH13's subfamily	GH	Glycoside Hydrolases		3150
GH13_9	GH13's subfamily	GH	Glycoside Hydrolases		2697
GH14	beta-amylase (EC 3.2.1.2)	GH	Glycoside Hydrolases		1
GH140	apiosidase (EC 3.2.1.-)	GH	Glycoside Hydrolases		1501
GH141	alpha-L-fucosidase (EC 3.2.1.51); xylanase (EC 3.2.1.8)	GH	Glycoside Hydrolases		3506
GH142	beta-L-arabinofuranosidase (EC 3.2.1.185)	GH	Glycoside Hydrolases		791
GH143	2-keto-3-deoxy-D-lyxo-heptulosaric acid hydrolase (EC 3.2.1.-)	GH	Glycoside Hydrolases		1082
GH144	endo-beta-1,2-glucanase (EC 3.2.1.71); beta-1,2-glucooligosaccharide sophorohydrolase (EC 3.2.1.-)	GH	Glycoside Hydrolases		582
GH145	L-Rhalpha-alpha-1,4-GlcA alpha-L-rhamnohydrolase (EC 3.2.1.-)	GH	Glycoside Hydrolases		135
GH146	beta-L-arabinofuranosidase (EC 3.2.1.185)				5154
GH147	beta-galactosidase (EC 3.2.1.23)				103
GH148	beta-1,3-glucanase (EC 3.2.1.-)				375
GH149	beta-1,3-glucan phosphorylase (EC 2.4.1.-)				61
GH15	glucoamylase (EC 3.2.1.3); glucodextranase (EC 3.2.1.70); alpha,alpha-trehalase (EC 3.2.1.28); dextran dextrinase (EC 2.4.1.2)	GH	Glycoside Hydrolases		72
GH150	l-carrageenase (EC 3.2.1.-)				69
GH151	alpha-L-fucosidase (EC 3.2.1.51)				341
GH153	poly-beta-1,6-D-glucosamine hydrolase (EC 3.2.1.-)				7
GH154	beta-glucuronidase (3.2.1.31)				1830
GH156	exo-alpha-sialidase (EC 3.2.1.18);				732
GH157	endo-beta-1,3-glucanase (EC 3.2.1.39); endo-beta-1,3-glucanase / laminarinase (EC 3.2.1.39)				30
GH158	endo-beta-1,3-glucanase (EC 3.2.1.39)				66
GH159	beta-D-galactofuranosidase (EC 3.2.1.146)				192
GH16	xyloglucan:xyloglucosyltransferase (EC 2.4.1.207); keratan-sulfate endo-1,4-beta-galactosidase (EC 3.2.1.103); endo-1,3-beta-glucanase / laminarinase (EC 3.2.1.39); endo-1,3(4)-beta-glucanase (EC 3.2.1.6); licheninase (EC 3.2.1.73); beta-agarase (EC 3.2.1.81); kappa;-carrageenase (EC 3.2.1.83); xyloglucanase (EC 3.2.1.151); endo-beta-1,3-galactanase (EC 3.2.1.181); [retaining] beta-porphyranase (…	GH	Glycoside Hydrolases		5164
GH160	endo-beta-1,4-galactosidase (EC 3.2.1.-)				7
GH161	beta-1,3-glucan phosphorylase (EC 2.4.1.-)				101
GH163	endo-beta-N-acetylglucosaminidase cleaving GlcNAc-beta-1,2-Man (EC 3.2.1.-)				2059
GH164	beta-mannosidase (EC 3.2.1.25); beta-mannosidase (EC 3.2.1.25)				99
GH165	beta-galactosidase (EC 3.2.1.23)				463
GH17	glucan endo-1,3-beta-glucosidase (EC 3.2.1.39); glucan 1,3-beta-glucosidase (EC 3.2.1.58); licheninase (EC 3.2.1.73); ABA-specific beta-glucosidase (EC 3.2.1.175); beta-1,3-glucanosyltransglycosylase (EC 2.4.1.-)	GH	Glycoside Hydrolases		29
GH18	chitinase (EC 3.2.1.14); lysozyme (EC 3.2.1.17); endo-beta-N-acetylglucosaminidase (EC 3.2.1.96); peptidoglycan hydrolase with endo-beta-N-acetylglucosaminidase specificity (EC 3.2.1.-); Nod factor hydrolase (EC 3.2.1.-); xylanase inhibitor; concanavalin B; narbonin	GH	Glycoside Hydrolases		3920
GH19	chitinase (EC 3.2.1.14); lysozyme (EC 3.2.1.17)	GH	Glycoside Hydrolases		95
GH2	beta-galactosidase (EC 3.2.1.23) ; beta-mannosidase (EC 3.2.1.25); beta-glucuronidase (EC 3.2.1.31); alpha-L-arabinofuranosidase (EC 3.2.1.55); mannosylglycoprotein endo-beta-mannosidase (EC 3.2.1.152); exo-beta-glucosaminidase (EC 3.2.1.165); alpha-L-arabinopyranosidase (EC 3.2.1.-); beta-galacturonidase (EC 3.2.1.-); beta-xylosidase (EC 3.2.1.37); beta-D-galactofuranosidase (EC 3.2.1.146);	GH	Glycoside Hydrolases		60407
GH20	beta-hexosaminidase (EC 3.2.1.52); lacto-N-biosidase (EC 3.2.1.140); beta-1,6-N-acetylglucosaminidase (EC 3.2.1.-); beta-6-SO3-N-acetylglucosaminidase (EC 3.2.1.-)	GH	Glycoside Hydrolases		11732
GH22	lysozyme type C (EC 3.2.1.17); lysozyme type i (EC 3.2.1.17); alpha-lactalbumin	GH	Glycoside Hydrolases		5
GH23	lysozyme type G (EC 3.2.1.17); peptidoglycan lyase (EC 4.2.2.n1) also known in the literature as peptidoglycan lytic transglycosylase; chitinase (EC 3.2.1.14)	GH	Glycoside Hydrolases		6973
GH24	lysozyme (EC 3.2.1.17)	GH	Glycoside Hydrolases		746
GH25	lysozyme (EC 3.2.1.17)	GH	Glycoside Hydrolases		6849
GH26	beta-mannanase (EC 3.2.1.78); exo-beta-1,4-mannobiohydrolase (EC 3.2.1.100); beta-1,3-xylanase (EC 3.2.1.32); lichenase / endo-beta-1,3-1,4-glucanase (EC 3.2.1.73); mannobiose-producing exo-beta-mannanase (EC 3.2.1.-)	GH	Glycoside Hydrolases		6354
GH27	alpha-galactosidase (EC 3.2.1.22); alpha-N-acetylgalactosaminidase (EC 3.2.1.49); isomalto-dextranase (EC 3.2.1.94); beta-L-arabinopyranosidase (EC 3.2.1.88); galactan:galactan galactosyltransferase (EC 2.4.1.-)	GH	Glycoside Hydrolases		3522
GH28	polygalacturonase (EC 3.2.1.15); alpha-L-rhamnosidase (EC 3.2.1.40); exo-polygalacturonase (EC 3.2.1.67); exo-polygalacturonosidase (EC 3.2.1.82); rhamnogalacturonase (EC 3.2.1.171); rhamnogalacturonan alpha-1,2-galacturonohydrolase (EC 3.2.1.173); endo-xylogalacturonan hydrolase (EC 3.2.1.-)	GH	Glycoside Hydrolases		12957
GH29	alpha-L-fucosidase (EC 3.2.1.51); alpha-1,3/1,4-L-fucosidase (EC 3.2.1.111)	GH	Glycoside Hydrolases		11584
GH3	beta-glucosidase (EC 3.2.1.21); xylan 1,4-beta-xylosidase (EC 3.2.1.37); beta-glucosylceramidase (EC 3.2.1.45); beta-N-acetylhexosaminidase (EC 3.2.1.52); alpha-L-arabinofuranosidase (EC 3.2.1.55); glucan 1,3-beta-glucosidase (EC 3.2.1.58); glucan 1,4-beta-glucosidase (EC 3.2.1.74); isoprimeverose-producing oligoxyloglucan hydrolase (EC 3.2.1.120); coniferin beta-glucosidase (EC 3.2.1.126); exo-1…	GH	Glycoside Hydrolases		23216
GH30	endo-beta-1,4-xylanase (EC 3.2.1.8); beta-glucosidase (3.2.1.21); beta-glucuronidase (EC 3.2.1.31); beta-xylosidase (EC 3.2.1.37); beta-fucosidase (EC 3.2.1.38); glucosylceramidase (EC 3.2.1.45); beta-1,6-glucanase (EC 3.2.1.75); glucuronoarabinoxylan endo-beta-1,4-xylanase (EC 3.2.1.136); endo-beta-1,6-galactanase (EC:3.2.1.164); [reducing end] beta-xylosidase (EC 3.2.1.-)	GH	Glycoside Hydrolases		650
GH30_1	GH30's subfamily	GH	Glycoside Hydrolases		289
GH30_2	GH30's subfamily	GH	Glycoside Hydrolases		600
GH30_3	GH30's subfamily	GH	Glycoside Hydrolases		1130
GH30_4	GH30's subfamily	GH	Glycoside Hydrolases		340
GH30_5	GH30's subfamily	GH	Glycoside Hydrolases		740
GH30_7	GH30's subfamily	GH	Glycoside Hydrolases		19
GH30_8	GH30's subfamily	GH	Glycoside Hydrolases		989
GH31	alpha-glucosidase (EC 3.2.1.20); alpha-galactosidase (EC 3.2.1.22); alpha-mannosidase (EC 3.2.1.24); alpha-1,3-glucosidase (EC 3.2.1.84); sucrase-isomaltase (EC 3.2.1.48) (EC 3.2.1.10); alpha-xylosidase (EC 3.2.1.177); alpha-glucan lyase (EC 4.2.2.13); isomaltosyltransferase (EC 2.4.1.-); oligosaccharide alpha-1,4-glucosyltransferase (EC 2.4.1.161); sulfoquinovosidase (EC 3.2.1.-)	GH	Glycoside Hydrolases		17346
GH32	invertase (EC 3.2.1.26); endo-inulinase (EC 3.2.1.7); beta-2,6-fructan 6-levanbiohydrolase (EC 3.2.1.64); endo-levanase (EC 3.2.1.65); exo-inulinase (EC 3.2.1.80); fructan beta-(2,1)-fructosidase/1-exohydrolase (EC 3.2.1.153); fructan beta-(2,6)-fructosidase/6-exohydrolase (EC 3.2.1.154); sucrose:sucrose 1-fructosyltransferase (EC 2.4.1.99); fructan:fructan 1-fructosyltransferase (EC 2.4.1.100); …	GH	Glycoside Hydrolases		6689
GH33	sialidase or neuraminidase (EC 3.2.1.18); trans-sialidase (EC 2.4.1.-); anhydrosialidase (EC 4.2.2.15); Kdo hydrolase (EC 3.2.1.-); 2-keto-3-deoxynononic acid hydrolase / KDNase (EC 3.2.1.-)	GH	Glycoside Hydrolases		6179
GH35	beta-galactosidase (EC 3.2.1.23); exo-beta-glucosaminidase (EC 3.2.1.165); exo-beta-1,4-galactanase (EC 3.2.1.-); beta-1,3-galactosidase (EC 3.2.1.-)	GH	Glycoside Hydrolases		3313
GH36	alpha-galactosidase (EC 3.2.1.22); alpha-N-acetylgalactosaminidase (EC 3.2.1.49); stachyose synthase (EC 2.4.1.67); raffinose synthase (EC 2.4.1.82)	GH	Glycoside Hydrolases		9227
GH37	alpha,alpha-trehalase (EC 3.2.1.28).	GH	Glycoside Hydrolases		380
GH38	alpha-mannosidase (EC 3.2.1.24); mannosyl-oligosaccharide alpha-1,2-mannosidase (EC 3.2.1.113); mannosyl-oligosaccharide alpha-1,3-1,6-mannosidase (EC 3.2.1.114); alpha-2-O-mannosylglycerate hydrolase (EC 3.2.1.170); mannosyl-oligosaccharide alpha-1,3-mannosidase (EC 3.2.1.-)	GH	Glycoside Hydrolases		1384
GH39	alpha-L-iduronidase (EC 3.2.1.76); beta-xylosidase (EC 3.2.1.37).	GH	Glycoside Hydrolases		2216
GH4	maltose-6-phosphate glucosidase (EC 3.2.1.122); alpha-glucosidase (EC 3.2.1.20); alpha-galactosidase (EC 3.2.1.22); 6-phospho-beta-glucosidase (EC 3.2.1.86); alpha-glucuronidase (EC 3.2.1.139); alpha-galacturonase (EC 3.2.1.67); palatinase (EC 3.2.1.-)	GH	Glycoside Hydrolases		1527
GH42	beta-galactosidase (EC 3.2.1.23); alpha-L-arabinopyranosidase (EC 3.2.1.-)	GH	Glycoside Hydrolases		1473
GH43	beta-xylosidase (EC 3.2.1.37); alpha-L-arabinofuranosidase (EC 3.2.1.55); xylanase (EC 3.2.1.8); alpha-1,2-L-arabinofuranosidase (EC 3.2.1.-); exo-alpha-1,5-L-arabinofuranosidase (EC 3.2.1.-); [inverting] exo-alpha-1,5-L-arabinanase (EC 3.2.1.-); beta-1,3-xylosidase (EC 3.2.1.-); [inverting] exo-alpha-1,5-L-arabinanase (EC 3.2.1.-); [inverting] endo-alpha-1,5-L-arabinanase (EC 3.2.1.99); exo-beta…	GH	Glycoside Hydrolases		864
GH43_1	GH43's subfamily	GH	Glycoside Hydrolases		1553
GH43_10	GH43's subfamily	GH	Glycoside Hydrolases		5298
GH43_11	GH43's subfamily	GH	Glycoside Hydrolases		157
GH43_12	GH43's subfamily	GH	Glycoside Hydrolases		1891
GH43_13	GH43's subfamily	GH	Glycoside Hydrolases		2
GH43_14	GH43's subfamily	GH	Glycoside Hydrolases		7
GH43_15	GH43's subfamily	GH	Glycoside Hydrolases		22
GH43_16	GH43's subfamily	GH	Glycoside Hydrolases		1338
GH43_17	GH43's subfamily	GH	Glycoside Hydrolases		1734
GH43_18	GH43's subfamily	GH	Glycoside Hydrolases		461
GH43_19	GH43's subfamily	GH	Glycoside Hydrolases		1647
GH43_2	GH43's subfamily	GH	Glycoside Hydrolases		2697
GH43_20	GH43's subfamily	GH	Glycoside Hydrolases		148
GH43_22	GH43's subfamily	GH	Glycoside Hydrolases		149
GH43_23	GH43's subfamily	GH	Glycoside Hydrolases		4
GH43_24	GH43's subfamily	GH	Glycoside Hydrolases		1587
GH43_26	GH43's subfamily	GH	Glycoside Hydrolases		484
GH43_27	GH43's subfamily	GH	Glycoside Hydrolases		298
GH43_28	GH43's subfamily	GH	Glycoside Hydrolases		2408
GH43_29	GH43's subfamily	GH	Glycoside Hydrolases		3026
GH43_3	GH43's subfamily	GH	Glycoside Hydrolases		862
GH43_30	GH43's subfamily	GH	Glycoside Hydrolases		25
GH43_31	GH43's subfamily	GH	Glycoside Hydrolases		650
GH43_32	GH43's subfamily	GH	Glycoside Hydrolases		65
GH43_33	GH43's subfamily	GH	Glycoside Hydrolases		247
GH43_34	GH43's subfamily	GH	Glycoside Hydrolases		1543
GH43_35	GH43's subfamily	GH	Glycoside Hydrolases		4343
GH43_36	GH43's subfamily	GH	Glycoside Hydrolases		4
GH43_37	GH43's subfamily	GH	Glycoside Hydrolases		74
GH43_4	GH43's subfamily	GH	Glycoside Hydrolases		3062
GH43_5	GH43's subfamily	GH	Glycoside Hydrolases		1531
GH43_6	GH43's subfamily	GH	Glycoside Hydrolases		1
GH43_7	GH43's subfamily	GH	Glycoside Hydrolases		1775
GH43_8	GH43's subfamily	GH	Glycoside Hydrolases		98
GH43_9	GH43's subfamily	GH	Glycoside Hydrolases		786
GH44	endoglucanase (EC 3.2.1.4); xyloglucanase (EC 3.2.1.151)	GH	Glycoside Hydrolases		203
GH45	endoglucanase (EC 3.2.1.4); xyloglucan-specific endo-beta-1,4-glucanase / endo-xyloglucanase (EC 3.2.1.151); endo-beta-1,4-mannanase (EC 3.2.1.78)	GH	Glycoside Hydrolases		701
GH46	chitosanase (EC 3.2.1.132)	GH	Glycoside Hydrolases		7
GH47	alpha-mannosidase (EC 3.2.1.113)	GH	Glycoside Hydrolases		168
GH48	reducing end-acting cellobiohydrolase (EC 3.2.1.176); endo-beta-1,4-glucanase (EC 3.2.1.4); chitinase (EC 3.2.1.14)	GH	Glycoside Hydrolases		54
GH49	dextranase (EC 3.2.1.11); isopullulanase (EC 3.2.1.57); dextran 1,6-alpha-isomaltotriosidase (EC 3.2.1.95); sulfated arabinan endo-1,4-beta-L-arabinanase (EC 3.2.1.-)	GH	Glycoside Hydrolases		31
GH5	endo-beta-1,4-glucanase / cellulase (EC 3.2.1.4); endo-beta-1,4-xylanase (EC 3.2.1.8); beta-glucosidase (EC 3.2.1.21); beta-mannosidase (EC 3.2.1.25); beta-glucosylceramidase (EC 3.2.1.45); glucan beta-1,3-glucosidase (EC 3.2.1.58); licheninase (EC 3.2.1.73); exo-beta-1,4-glucanase / cellodextrinase (EC 3.2.1.74); glucan endo-1,6-beta-glucosidase (EC 3.2.1.75); mannan endo-beta-1,4-mannosidase (E…	GH	Glycoside Hydrolases		1838
GH50	beta-agarase (EC 3.2.1.81).	GH	Glycoside Hydrolases		920
GH51	endoglucanase (EC 3.2.1.4); endo-beta-1,4-xylanase (EC 3.2.1.8); beta-xylosidase (EC 3.2.1.37); alpha-L-arabinofuranosidase (EC 3.2.1.55); lichenase / endo-beta-1,3-1,4-glucanase (EC 3.2.1.73)	GH	Glycoside Hydrolases		12237
GH52	beta-xylosidase (EC 3.2.1.37).	GH	Glycoside Hydrolases		2
GH53	endo-beta-1,4-galactanase (EC 3.2.1.89).	GH	Glycoside Hydrolases		5824
GH54	alpha-L-arabinofuranosidase (EC 3.2.1.55); beta-xylosidase (EC 3.2.1.37).	GH	Glycoside Hydrolases		651
GH55	exo-beta-1,3-glucanase (EC 3.2.1.58); endo-beta-1,3-glucanase (EC 3.2.1.39)	GH	Glycoside Hydrolases		568
GH57	alpha-amylase (EC 3.2.1.1); alpha-galactosidase (EC 3.2.1.22); amylopullulanase (EC 3.2.1.41); cyclomaltodextrinase (EC 3.2.1.54); branching enzyme (EC 2.4.1.18); 4-alpha-glucanotransferase (EC 2.4.1.25)	GH	Glycoside Hydrolases		2570
GH59	beta-galactosidase (EC 3.2.1.23); galactocerebrosidase (EC 3.2.1.46)	GH	Glycoside Hydrolases		278
GH5_1	GH5's subfamily	GH	Glycoside Hydrolases		387
GH5_10	GH5's subfamily	GH	Glycoside Hydrolases		172
GH5_12	GH5's subfamily	GH	Glycoside Hydrolases		3
GH5_13	GH5's subfamily	GH	Glycoside Hydrolases		489
GH5_14	GH5's subfamily	GH	Glycoside Hydrolases		2
GH5_19	GH5's subfamily	GH	Glycoside Hydrolases		75
GH5_2	GH5's subfamily	GH	Glycoside Hydrolases		1376
GH5_21	GH5's subfamily	GH	Glycoside Hydrolases		581
GH5_22	GH5's subfamily	GH	Glycoside Hydrolases		11
GH5_25	GH5's subfamily	GH	Glycoside Hydrolases		386
GH5_26	GH5's subfamily	GH	Glycoside Hydrolases		398
GH5_27	GH5's subfamily	GH	Glycoside Hydrolases		57
GH5_28	GH5's subfamily	GH	Glycoside Hydrolases		45
GH5_29	GH5's subfamily	GH	Glycoside Hydrolases		2
GH5_35	GH5's subfamily	GH	Glycoside Hydrolases		15
GH5_36	GH5's subfamily	GH	Glycoside Hydrolases		222
GH5_37	GH5's subfamily	GH	Glycoside Hydrolases		1014
GH5_38	GH5's subfamily	GH	Glycoside Hydrolases		609
GH5_39	GH5's subfamily	GH	Glycoside Hydrolases		38
GH5_4	GH5's subfamily	GH	Glycoside Hydrolases		5954
GH5_40	GH5's subfamily	GH	Glycoside Hydrolases		7
GH5_41	GH5's subfamily	GH	Glycoside Hydrolases		4
GH5_42	GH5's subfamily	GH	Glycoside Hydrolases		35
GH5_44	GH5's subfamily	GH	Glycoside Hydrolases		157
GH5_45	GH5's subfamily	GH	Glycoside Hydrolases		2
GH5_46	GH5's subfamily	GH	Glycoside Hydrolases		594
GH5_47	GH5's subfamily	GH	Glycoside Hydrolases		3
GH5_48	GH5's subfamily	GH	Glycoside Hydrolases		35
GH5_49	GH5's subfamily	GH	Glycoside Hydrolases		2
GH5_5	GH5's subfamily	GH	Glycoside Hydrolases		11
GH5_51	GH5's subfamily	GH	Glycoside Hydrolases		1
GH5_52	GH5's subfamily	GH	Glycoside Hydrolases		127
GH5_54	GH5's subfamily				125
GH5_55	GH5's subfamily				98
GH5_56	GH5's subfamily				7
GH5_7	GH5's subfamily	GH	Glycoside Hydrolases		1523
GH5_8	GH5's subfamily	GH	Glycoside Hydrolases		228
GH5_9	GH5's subfamily	GH	Glycoside Hydrolases		2
GH63	processing alpha-glucosidase (EC 3.2.1.106); alpha-1,3-glucosidase (EC 3.2.1.84); alpha-glucosidase (EC 3.2.1.20); mannosylglycerate alpha-mannosidase / mannosylglycerate hydrolase (EC 3.2.1.170); glucosylglycerate hydrolase (EC 3.2.1.208)	GH	Glycoside Hydrolases		1080
GH64	beta-1,3-glucanase (EC 3.2.1.39)	GH	Glycoside Hydrolases		49
GH65	alpha,alpha-trehalase (EC 3.2.1.28); maltose phosphorylase (EC 2.4.1.8); trehalose phosphorylase (EC 2.4.1.64); kojibiose phosphorylase (EC 2.4.1.230); trehalose-6-phosphate phosphorylase (EC 2.4.1.216); nigerose phosphorylase (EC 2.4.1.279); 3-O-alpha-glucopyranosyl-L-rhamnose phosphorylase (EC 2.4.1.282); 2-O-alpha-glucopyranosylglycerol: phosphate beta-glucosyltransferase (EC 2.4.1.-); alpha-g…	GH	Glycoside Hydrolases		1008
GH66	cycloisomaltooligosaccharide glucanotransferase (EC 2.4.1.248); dextranase (EC 3.2.1.11).	GH	Glycoside Hydrolases		415
GH67	alpha-glucuronidase (EC 3.2.1.139); xylan alpha-1,2-glucuronidase (EC 3.2.1.131)	GH	Glycoside Hydrolases		3149
GH70	dextransucrase (EC 2.4.1.5); alternansucrase (EC 2.4.1.140); reuteransucrase (EC 2.4.1.-); alpha-4,6-glucanotransferase (EC 2.4.1.-); alpha-1,2-branched dextransucrase (EC 2.4.1.-); alpha-4,3-glucanotransferase (EC 2.4.1.-)	GH	Glycoside Hydrolases		29
GH71	alpha-1,3-glucanase (EC 3.2.1.59).	GH	Glycoside Hydrolases		3
GH72	beta-1,3-glucanosyltransglycosylase (EC 2.4.1.-)	GH	Glycoside Hydrolases		4
GH73	lysozyme (EC 3.2.1.17); mannosyl-glycoprotein endo-beta-N-acetylglucosaminidase (EC 3.2.1.96); peptidoglycan hydrolase with endo-beta-N-acetylglucosaminidase specificity (EC 3.2.1.-)	GH	Glycoside Hydrolases		5034
GH74	endoglucanase (EC 3.2.1.4); oligoxyloglucan reducing end-specific cellobiohydrolase (EC 3.2.1.150); xyloglucanase (EC 3.2.1.151)	GH	Glycoside Hydrolases		1216
GH76	alpha-1,6-mannanase (EC 3.2.1.101); alpha-glucosidase (EC 3.2.1.20)	GH	Glycoside Hydrolases		3363
GH77	amylomaltase or 4-alpha-glucanotransferase (EC 2.4.1.25)	GH	Glycoside Hydrolases		9206
GH78	alpha-L-rhamnosidase (EC 3.2.1.40); rhamnogalacturonan alpha-L-rhamnohydrolase (EC 3.2.1.174); L-Rhap-alpha-1,3-D-Apif -specific alpha-1,3-L-rhamnosidase (EC 3.2.1.-)	GH	Glycoside Hydrolases		20128
GH79	beta-glucuronidase (EC 3.2.1.31); hyaluronoglucuronidase (EC 3.2.1.36); heparanase (EC 3.2.1.166); baicalin beta-glucuronidase (EC 3.2.1.167); beta-4-O-methyl-glucuronidase (EC 3.2.1.-)	GH	Glycoside Hydrolases		71
GH8	chitosanase (EC 3.2.1.132); cellulase (EC 3.2.1.4); licheninase (EC 3.2.1.73); endo-1,4-beta-xylanase (EC 3.2.1.8); reducing-end-xylose releasing exo-oligoxylanase (EC 3.2.1.156)	GH	Glycoside Hydrolases		2279
GH81	endo-beta-1,3-glucanase (EC 3.2.1.39)	GH	Glycoside Hydrolases		80
GH82	Iota;-carrageenase (EC 3.2.1.157)	GH	Glycoside Hydrolases		130
GH83	neuraminidase (EC 3.2.1.18)	GH	Glycoside Hydrolases		16
GH84	N-acetyl beta-glucosaminidase (EC 3.2.1.52); hyaluronidase (EC 3.2.1.35); [protein]-3-O-(GlcNAc)-L-Ser/Thr beta-N-acetylglucosaminidase (EC 3.2.1.169)	GH	Glycoside Hydrolases		352
GH85	endo-beta-N-acetylglucosaminidase (EC 3.2.1.96)	GH	Glycoside Hydrolases		78
GH87	mycodextranase (EC 3.2.1.61); alpha-1,3-glucanase (EC 3.2.1.59)	GH	Glycoside Hydrolases		212
GH88	d-4,5-unsaturated beta-glucuronyl hydrolase (EC 3.2.1.-)	GH	Glycoside Hydrolases		2710
GH89	alpha-N-acetylglucosaminidase (EC 3.2.1.50)	GH	Glycoside Hydrolases		3133
GH9	endoglucanase (EC 3.2.1.4); endo-beta-1,3(4)-glucanase / lichenase-laminarinase (EC 3.2.1.6); beta-glucosidase (EC 3.2.1.21); lichenase / endo-beta-1,3-1,4-glucanase (EC 3.2.1.73); exo-beta-1,4-glucanase / cellodextrinase (EC 3.2.1.74); cellobiohydrolase (EC 3.2.1.91); xyloglucan-specific endo-beta-1,4-glucanase / endo-xyloglucanase (EC 3.2.1.151); exo-beta-glucosaminidase (EC 3.2.1.165)	GH	Glycoside Hydrolases		8010
GH91	inulin lyase [DFA-I-forming] (EC 4.2.2.17); inulin lyase [DFA-III-forming] (EC 4.2.2.18); difructofuranose 1,2':2,3' dianhydride hydrolase [DFA-IIIase] (EC 3.2.1.-)	GH	Glycoside Hydrolases		43
GH92	mannosyl-oligosaccharide alpha-1,2-mannosidase (EC 3.2.1.113); mannosyl-oligosaccharide alpha-1,3-mannosidase (EC 3.2.1.-); mannosyl-oligosaccharide alpha-1,6-mannosidase (EC 3.2.1.-); alpha-mannosidase (EC 3.2.1.24); alpha-1,2-mannosidase (EC 3.2.1.-); alpha-1,3-mannosidase (EC 3.2.1.-); alpha-1,4-mannosidase (EC 3.2.1.-); mannosyl-1-phosphodiester alpha-1,P-mannosidase (EC 3.2.1.-)	GH	Glycoside Hydrolases		17211
GH93	exo-alpha-L-1,5-arabinanase (EC 3.2.1.-)	GH	Glycoside Hydrolases		479
GH94	cellobiose phosphorylase (EC 2.4.1.20); laminaribiose phosphorylase (EC 2.4.1.31); cellodextrin phosphorylase (EC 2.4.1.49); chitobiose phosphorylase (EC 2.4.1.-); cyclic beta-1,2-glucan synthase (EC 2.4.1.-); cellobionic acid phosphorylase (EC 2.4.1.321); beta-1,2-oligoglucan phosphorylase (EC 2.4.1.-)	GH	Glycoside Hydrolases		9859
GH95	alpha-L-fucosidase (EC 3.2.1.51); alpha-1,2-L-fucosidase (EC 3.2.1.63); alpha-L-galactosidase (EC 3.2.1.-)	GH	Glycoside Hydrolases		12580
GH97	glucoamylase (EC 3.2.1.3); alpha-glucosidase (EC 3.2.1.20); alpha-galactosidase (EC 3.2.1.22)	GH	Glycoside Hydrolases		17610
GH98	blood-group endo-beta-1,4-galactosidase (EC 3.2.1.102); blood group A- and B-cleaving endo-beta-1,4-galactosidase (EC 3.2.1.-); endo-beta-1,4-xylanase (EC 3.2.1.8); endo-beta-1,4-xylanase (EC 3.2.1.8)	GH	Glycoside Hydrolases		635
GH99	glycoprotein endo-alpha-1,2-mannosidase (EC 3.2.1.130); mannan endo-1,2-alpha-mannanase (3.2.1.-)	GH	Glycoside Hydrolases		1882
GT1	UDP-glucuronosyltransferase (EC 2.4.1.17); zeatin O-beta-xylosyltransferase (EC 2.4.2.40); 2-hydroxyacylsphingosine 1-beta-galactosyltransferase (EC 2.4.1.45); N-acylsphingosine galactosyltransferase (EC 2.4.1.47); flavonol 3-O-glucosyltransferase (EC 2.4.1.91); anthocyanidin 3-O-glucosyltransferase (EC 2.4.1.115); sinapate 1-glucosyltransferase (EC 2.4.1.120); indole-3-acetate beta-glucosyltrans…	GT	Glycosyl Transferases		1095
GT10	galactoside alpha-1,3/1,4-L-fucosyltransferase (EC 2.4.1.65); galactoside alpha-1,3-L-fucosyltransferase (EC 2.4.1.152); glycoprotein alpha-1,3-L-fucosyltransferase (EC 2.4.1.214)	GT	Glycosyl Transferases		514
GT101	glucosyltransferase (EC 2.4.1.-)	GT	Glycosyl Transferases		55
GT103	UDP-GlcpNAc: O-antigen-polysaccharide beta-1,4-N-acetylglucosaminyltransferase (EC 2.4.1.56)	GT	Glycosyl Transferases		3
GT104	dTDP-beta-L-Rhap : arginine alpha-L-rhamnosyltransferase (EC 2.4.1.-)	GT	Glycosyl Transferases		8
GT107	CMP-beta-KDO: beta-2,4-KDO transferase (EC 2.4.99.-); CMP-beta-KDO: beta-2,7-KDO transferase (EC 2.4.99.-)				36
GT11	GDP-L-Fuc: galactoside alpha-1,2-L-fucosyltransferase (EC 2.4.1.69); GDP-L-Fuc: beta-LacNac alpha-1,3-L-fucosyltransferase (EC 2.4.1.-)	GT	Glycosyl Transferases		1153
GT12	[N-acetylneuraminyl]-galactosylglucosylceramide N-acetylgalactosaminyltransferase (EC 2.4.1.92).	GT	Glycosyl Transferases		2
GT13	alpha-1,3-mannosyl-glycoprotein beta-1,2-N-acetylglucosaminyltransferase (EC 2.4.1.101)	GT	Glycosyl Transferases		581
GT14	beta-1,3-galactosyl-O-glycosyl-glycoprotein beta-1,6-N-acetylglucosaminyltransferase (EC 2.4.1.102); N-acetyllactosaminide beta-1,6-N-acetylglucosaminyltransferase (EC 2.4.1.150); protein O-beta-xylosyltransferase (EC 2.4.2.26); UDP-GlcA:arabinogalactan beta-glucuronosyltransferase (EC 2.4.1.-)	GT	Glycosyl Transferases		617
GT15	glycolipid 2-alpha-mannosyltransferase (EC 2.4.1.131); GDP-Man: alpha-1,2-mannosyltransferase (EC 2.4.1.-).	GT	Glycosyl Transferases		1
GT17	beta-1,4-mannosyl-glycoprotein beta-1,4-N-acetylglucosaminyltransferase (EC 2.4.1.144).	GT	Glycosyl Transferases		35
GT19	lipid-A-disaccharide synthase (EC 2.4.1.182).	GT	Glycosyl Transferases		4683
GT20	alpha,alpha-trehalose-phosphate synthase [UDP-forming] (EC 2.4.1.15); Glucosylglycerol-phosphate synthase (EC 2.4.1.213); trehalose-6-P phosphatase (EC 3.1.3.12); [retaining] GDP-valeniol: validamine 7-phosphate valeniolyltransferase (EC 2.-.-.-)	GT	Glycosyl Transferases		126
GT21	UDP-Glc: ceramide beta-glucosyltransferase (EC 2.4.1.80).	GT	Glycosyl Transferases		106
GT22	Dol-P-Man: Man6GlcNAc2-PP-Dol alpha-1,2-mannosyltransferase (EC 2.4.1.259); Dol-P-Man: Man8GlcNAc2-PP-Dol alpha-1,2-mannosyltransferase (EC 2.4.1.261); Dol-P-Man: Man2-GlcNAc-phosphatidylinositol alpha-1,2-mannosyltransferase (EC 2.4.1.-); Dol-P-Man: Man3-GlcNAc-phosphatidylinositol alpha-1,2-mannosyltransferase (EC 2.4.1.-)	GT	Glycosyl Transferases		368
GT23	N-acetyl-beta-D-glucosaminide alpha-1,6-L-fucosyltransferase (EC 2.4.1.68); chitin-oligosaccharide alpha-1,6-L-fucosyltransferase (EC 2.4.1.-)	GT	Glycosyl Transferases		483
GT25	lipopolysaccharide beta-1,4-galactosyltransferase (EC 2.4.1.-); beta-1,3-glucosyltransferase (EC 2.4.1.-); beta-1,2-glucosyltransferase (EC 2.4.1.-); beta-1,2-galactosyltransferase (EC 2.4.1.-); LPS beta-1,4-galactosyltransferase (EC 2.4.1.-); occidiofungin beta-xylosyltransferase (EC 2.4.2.-); UDP-Gal:procollagen beta-galactosyltransferase (EC 2.4.1.50)	GT	Glycosyl Transferases		110
GT26	UDP-ManNAcA: beta-N-acetyl mannosaminuronyltransferase (EC 2.4.1.-); UDP-ManNAc: beta-N-acetyl-mannosaminyltransferase (EC 2.4.1.-); UDP-Glc: beta-1,4-glucosyltransferase (EC 2.4.1.-); beta-1,4-galactosyltransferase (EC 2.4.1.-)	GT	Glycosyl Transferases		1373
GT27	polypeptide alpha-N-acetylgalactosaminyltransferase (EC 2.4.1.41)	GT	Glycosyl Transferases		1912
GT28	1,2-diacylglycerol 3-beta-galactosyltransferase (EC 2.4.1.46); 1,2-diacylglycerol 3-beta-glucosyltransferase (EC 2.4.1.157); UDP-GlcNAc: Und-PP-MurAc-pentapeptide beta-N-acetylglucosaminyltransferase (EC 2.4.1.227); digalactosyldiacylglycerol synthase (EC 2.4.1.241)	GT	Glycosyl Transferases		5782
GT2_Chitin_synth_2	GT2's subfamily				65
GT2_Glyco_tranf_2_2	GT2's subfamily				133
GT2_Glyco_tranf_2_3	GT2's subfamily				3674
GT2_Glyco_tranf_2_4	GT2's subfamily				441
GT2_Glyco_tranf_2_5	GT2's subfamily				177
GT2_Glyco_trans_2_3	GT2's subfamily				1035
GT2_Glycos_transf_2	GT2's subfamily				53317
GT3	glycogen synthase (EC 2.4.1.11).	GT	Glycosyl Transferases		2735
GT30	CMP-beta-KDO: alpha-3-deoxy-D-manno-octulosonic-acid (KDO) transferase (EC 2.4.99.-).	GT	Glycosyl Transferases		2322
GT31	N-acetyllactosaminide beta-1,3-N-acetylglucosaminyltransferase (EC 2.4.1.149); Glycoprotein-N-acetylgalactosamine 3-beta-galactosyltransferase (EC 2.4.1.122); fucose-specific beta-1,3-N-acetylglucosaminyltransferase (EC 2.4.1.-); globotriosylceramide beta-1,3-GalNAc transferase (EC 2.4.1.79); chondroitin synthase (beta-1,3-GlcUA and beta-1,4-GalNAc transferase (EC 2.4.1.175); chondroitin beta-1,3…	GT	Glycosyl Transferases		11
GT32	alpha-1,6-mannosyltransferase (EC 2.4.1.-); alpha-1,4-N-acetylglucosaminyltransferase (EC 2.4.1.-); alpha-1,4-N-acetylgalactosaminyltransferase (EC 2.4.1.-); GDP-Man: inositol-phosphorylceramide transferase (EC 2.4.1.-); UDP-Gal: beta-galactoside alpha-1,4-galactosyltransferase (EC 2.4.1.-); UDP-Gal: lactose/N-acetyl-lactosamine alpha-1,4-galactosyltransferase (EC 2.4.1.-); UDP-Glc: protein alpha…	GT	Glycosyl Transferases		1323
GT33	GDP-Man: chitobiosyldiphosphodolichol beta-mannosyltransferase (EC 2.4.1.142).	GT	Glycosyl Transferases		20
GT34	UDP-Gal: galactomannan alpha-1,6-galactosyltransferase (EC 2.4.1.-); UDP-Xyl: xyloglucan alpha-1,6-xylosyltransferase (EC 2.4.2.39); alpha-1,2-galactosyltransferase (EC 2.4.1.-)	GT	Glycosyl Transferases		0
GT35	glycogen or starch phosphorylase (EC 2.4.1.1).	GT	Glycosyl Transferases		9699
GT38	polysialyltransferase (EC 2.4.-.-)	GT	Glycosyl Transferases		7
GT39	Dol-P-Man: protein alpha-mannosyltransferase (EC 2.4.1.109)	GT	Glycosyl Transferases		1126
GT4	sucrose synthase (EC 2.4.1.13); sucrose-phosphate synthase (EC 2.4.1.14); alpha-glucosyltransferase (EC 2.4.1.52); lipopolysaccharide N-acetylglucosaminyltransferase (EC 2.4.1.56); phosphatidylinositol alpha-mannosyltransferase (EC 2.4.1.57); GDP-Man: Man1GlcNAc2-PP-dolichol alpha-1,3-mannosyltransferase (EC 2.4.1.132); GDP-Man: Man3GlcNAc2-PP-dolichol/Man4GlcNAc2-PP-dolichol alpha-1,2-mannosyltr…	GT	Glycosyl Transferases		32241
GT40	beta-1,3-galactofuranosyltransferases (EC 2.4.1.-)	GT	Glycosyl Transferases		22
GT41	UDP-GlcNAc: peptide beta-N-acetylglucosaminyltransferase (EC 2.4.1.255); UDP-Glc: peptide N-beta-glucosyltransferase (EC 2.4.1.-)	GT	Glycosyl Transferases		29011
GT45	alpha-N-acteylglucosaminyltransferase (EC 2.4.1.-)	GT	Glycosyl Transferases		10
GT46	Deleted	GT	Glycosyl Transferases		64
GT48	1,3-beta-glucan synthase (EC 2.4.1.34)	GT	Glycosyl Transferases		3
GT5	UDP-Glc: glycogen glucosyltransferase (EC 2.4.1.11); ADP-Glc: starch glucosyltransferase (EC 2.4.1.21); NDP-Glc: starch glucosyltransferase (EC 2.4.1.242); UDP-Glc: alpha-1,3-glucan synthase (EC 2.4.1.183) UDP-Glc: alpha-1,4-glucan synthase (EC 2.4.1.-)	GT	Glycosyl Transferases		9506
GT50	Dol-P-Man alpha-1,4-mannosyltransferase (EC 2.4.1.-)	GT	Glycosyl Transferases		6
GT51	murein polymerase (EC 2.4.1.129).	GT	Glycosyl Transferases		5764
GT53	UDP-L-Ara: alpha-L-arabinosyltransferase (EC 2.4.2.-)	GT	Glycosyl Transferases		36
GT54	UDP-GlcNAc: alpha-1,3-D-mannoside beta-1,4-N-acetylglucosaminyltransferase (EC 2.4.1.145)	GT	Glycosyl Transferases		2
GT56	TDP-Fuc4NAc: lipid II Fuc4NAc transferase (EC 2.4.1.-)	GT	Glycosyl Transferases		399
GT57	Dol-P-Glc: alpha-1,3-glucosyltransferase (EC 2.4.1.-)	GT	Glycosyl Transferases		6
GT58	Dol-P-Man: Man5GlcNAc2-PP-Dol alpha-1,3-mannosyltransferase (EC 2.4.1.258)	GT	Glycosyl Transferases		4
GT6	alpha-1,3-galactosyltransferase (EC 2.4.1.87); alpha-1,3 N-acetylgalactosaminyltransferase (EC 2.4.1.40); alpha-galactosyltransferase (EC 2.4.1.37); globoside alpha-N-acetylgalactosaminyltransferase (EC 2.4.1.88).	GT	Glycosyl Transferases		31
GT60	UDP-GlcNAc: polypeptide alpha-N-acetylglucosaminyltransferase (EC 2.4.1.-); UDP-GlcNAc: hydroxyproline polypeptide alpha-N-acetylglucosaminyltransferase (EC 2.4.1.-)	GT	Glycosyl Transferases		6
GT62	alpha-1,2-mannosyltransferase (EC 2.4.1.-); alpha-1,6-mannosyltransferase (EC 2.4.1.-)	GT	Glycosyl Transferases		18
GT63	UDP-Glc: DNA beta-glucosyltransferase (EC 2.4.1.27)	GT	Glycosyl Transferases		5
GT64	UDP-GlcNAc: heparan alpha-N-acetylhexosaminyltransferase (EC 2.4.1.224)	GT	Glycosyl Transferases		9
GT66	dolichyl-diphosphooligosaccharidea protein glycotransferase (EC 2.4.99.18); undecaprenyl-diphosphooligosaccharidea protein glycotransferase (EC 2.4.99.19)	GT	Glycosyl Transferases		877
GT68	GDP-Fuc: protein O-alpha-fucosyltransferase (EC 2.4.1.-)	GT	Glycosyl Transferases		2
GT69	GDP-Man: alpha-1,3-mannosyltransferase (EC 2.4.1.-)	GT	Glycosyl Transferases		34
GT7	lactose synthase (EC 2.4.1.22); beta-N-acetylglucosaminyl-glycopeptide beta-1,4-galactosyltransferase (EC 2.4.1.38); N-acetyllactosamine synthase (EC 2.4.1.90); xylosylprotein beta-4-galactosyltransferase (EC 2.4.1.133); UDP-Gal: neolactotriaosylceramide beta-1,4-galactosyltransferase (EC 2.4.1.275); beta-1,4-N-acetylglucosaminyltransferase (EC 2.4.1.-)	GT	Glycosyl Transferases		29
GT70	UDP-GlcA: beta-glucuronosyltransferase (EC 2.4.1.17)	GT	Glycosyl Transferases		16
GT73	CMP-beta-KDO: alpha-3-deoxy-D-manno-octulosonic-acid (KDO) transferase (EC 2.4.99.-).	GT	Glycosyl Transferases		32
GT74	alpha-1,2-L-fucosyltransferase (EC 2.4.1.69)	GT	Glycosyl Transferases		1
GT75	UDP-Glc: self-glucosylating beta-glucosyltransferase (EC 2.4.1.-); UDP-L-arabinopyranose mutase (EC 5.4.99.-)	GT	Glycosyl Transferases		20
GT76	Dol-P-Man: alpha-1,6-mannosyltransferase (EC 2.4.1.-)	GT	Glycosyl Transferases		405
GT77	alpha-xylosyltransferase (EC 2.4.2.39); alpha-1,3-galactosyltransferase (EC 2.4.1.37); arabinosyltransferase (EC 2.4.2.-); arabinosyltransferase (EC 2.4.2.-)	GT	Glycosyl Transferases		2
GT8	lipopolysaccharide alpha-1,3-galactosyltransferase (EC 2.4.1.44); UDP-Glc: (glucosyl)lipopolysaccharide alpha-1,2-glucosyltransferase (EC 2.4.1.-); lipopolysaccharide glucosyltransferase 1 (EC 2.4.1.58); glycogenin glucosyltransferase (EC 2.4.1.186); inositol 1-alpha-galactosyltransferase (galactinol synthase) (EC 2.4.1.123); homogalacturonan alpha-1,4-galacturonosyltransferase (EC 2.4.1.43); UDP…	GT	Glycosyl Transferases		2147
GT80	beta-galactoside alpha-2,6-sialyltransferase (EC 2.4.99.1); beta-galactoside alpha-2,3-sialyltransferase (EC 2.4.99.4)	GT	Glycosyl Transferases		2
GT81	NDP-Glc: glucosyl-3-phosphoglycerate synthase (EC 2.4.1.-); NDP-Man: mannosyl-3-phosphoglycerate synthase (EC 2.4.1.-);	GT	Glycosyl Transferases		422
GT82	UDP-GalNAc: beta-1,4-N-acetylgalactosaminyltransferase (EC 2.4.1.-)	GT	Glycosyl Transferases		13
GT83	undecaprenyl phosphate-alpha-L-Ara4N: 4-amino-4-deoxy-beta-L-arabinosyltransferase (EC 2.4.2.43); dodecaprenyl phosphate-beta-galacturonic acid: lipopolysaccharide core alpha-galacturonosyl transferase (EC 2.4.1.-)	GT	Glycosyl Transferases		4923
GT84	cyclic beta-1,2-glucan synthase (EC 2.4.1.-);	GT	Glycosyl Transferases		337
GT85	beta-D-arabinofuranosyl monophosphoryldecaprenol: galactan alpha-D-arabinofuranosyltransferase (EC 2.4.2.-)	GT	Glycosyl Transferases		24
GT87	polyprenol-P-Man: alpha-1,2-mannosyltransferase (EC 2.4.1.-)	GT	Glycosyl Transferases		268
GT89	beta-D-arabinofuranosyl-1-monophosphoryldecaprenol : arabinan beta-1,2-arabinofuranosyltransferase (EC 2.4.2.-)	GT	Glycosyl Transferases		5
GT9	lipopolysaccharide N-acetylglucosaminyltransferase (EC 2.4.1.56); heptosyltransferase (EC 2.4.-.-).	GT	Glycosyl Transferases		3134
GT90	UDP-Xyl: (mannosyl) glucuronoxylomannan/galactoxylomannan beta-1,2-xylosyltransferase (EC 2.4.2.-); UDP-Glc: protein O-beta-glucosyltransferase (EC 2.4.1.-); UDP-Xyl: protein O-beta-xylosyltransferase (EC 2.4.2.-)	GT	Glycosyl Transferases		212
GT92	UDP-Gal: N-glycan core alpha-1,6-fucoside beta-1,4-galactosyltransferase (EC 2.4.1.-); UDP-Gal: beta-galactoside beta-1,4-galactosyltransferase (EC 2.4.1.-)	GT	Glycosyl Transferases		281
GT94	GDP-Man: GlcA-beta-1,2-Man-alpha-1,3-Glc-beta-1,4-Glc-alpha-1-PP-undecaprenol beta-1,4-mannosyltransferase (2.4.1.251)	GT	Glycosyl Transferases		1468
GT97	CMP-Neu5Ac:alpha-galactoside alpha-2,6-sialyltransferase (EC 2.4.99.-); CMP-Neu5Ac:alpha-glucoside alpha-2,6-sialyltransferase (EC 2.4.99.-);	GT	Glycosyl Transferases		37
GT99	CMP-beta-KDO 3-deoxy-beta-D-manno-oct-2-ulosonic acid transferase (EC 2.4.99.-)	GT	Glycosyl Transferases		7
PL1	pectate lyase (EC 4.2.2.2); exo-pectate lyase (EC 4.2.2.9); pectin lyase (EC 4.2.2.10).	PL	Polysaccharide Lyases		1882
PL10	pectate lyase (EC 4.2.2.2)	PL	Polysaccharide Lyases		59
PL10_1	PL10's subfamily	PL	Polysaccharide Lyases		1008
PL10_2	PL10's subfamily	PL	Polysaccharide Lyases		511
PL10_3	PL10's subfamily	PL	Polysaccharide Lyases		5
PL11	rhamnogalacturonan endolyase (EC 4.2.2.23); rhamnogalacturonan exolyase (EC 4.2.2.24)	PL	Polysaccharide Lyases		1129
PL11_1	PL11's subfamily	PL	Polysaccharide Lyases		5201
PL11_2	PL11's subfamily	PL	Polysaccharide Lyases		404
PL12	heparin-sulfate lyase (EC 4.2.2.8)	PL	Polysaccharide Lyases		185
PL12_2	PL12's subfamily	PL	Polysaccharide Lyases		21
PL12_3	PL12's subfamily	PL	Polysaccharide Lyases		33
PL14	alginate lyase (EC 4.2.2.3); exo-oligoalginate lyase (EC 4.2.2.26); beta-1,4-glucuronan lyase (EC 4.2.2.14)	PL	Polysaccharide Lyases		1
PL14_3	PL14's subfamily	PL	Polysaccharide Lyases		113
PL15	oligo-alginate lyase (EC 4.2.2.-); alginate lyase (EC 4.2.2.3)	PL	Polysaccharide Lyases		43
PL15_1	PL15's subfamily	PL	Polysaccharide Lyases		1
PL16	hyaluronan lyase (EC 4.2.2.1).	PL	Polysaccharide Lyases		4
PL17	alginate lyase (EC 4.2.2.3); oligoalginate lyase (EC 4.2.2.26)	PL	Polysaccharide Lyases		24
PL17_1	PL17's subfamily	PL	Polysaccharide Lyases		8
PL17_2	PL17's subfamily	PL	Polysaccharide Lyases		5
PL1_1	PL1's subfamily	PL	Polysaccharide Lyases		1
PL1_11	PL1's subfamily	PL	Polysaccharide Lyases		9
PL1_2	PL1's subfamily	PL	Polysaccharide Lyases		2641
PL1_3	PL1's subfamily	PL	Polysaccharide Lyases		13
PL1_4	PL1's subfamily	PL	Polysaccharide Lyases		6
PL1_5	PL1's subfamily	PL	Polysaccharide Lyases		11
PL1_6	PL1's subfamily	PL	Polysaccharide Lyases		2
PL1_7	PL1's subfamily	PL	Polysaccharide Lyases		24
PL1_8	PL1's subfamily	PL	Polysaccharide Lyases		7
PL1_9	PL1's subfamily	PL	Polysaccharide Lyases		4
PL2	pectate lyase (EC 4.2.2.2); exo-polygalacturonate lyase (EC 4.2.2.9).	PL	Polysaccharide Lyases		1
PL21	heparin lyase (EC 4.2.2.7); heparin-sulfate lyase (EC 4.2.2.8); acharan-sulfate lyase (EC 4.2.2.-)	PL	Polysaccharide Lyases		13
PL21_1	PL21's subfamily	PL	Polysaccharide Lyases		10
PL22	oligogalacturonate lyase / oligogalacturonide lyase (EC 4.2.2.6)	PL	Polysaccharide Lyases		2249
PL22_1	PL22's subfamily	PL	Polysaccharide Lyases		45
PL22_2	PL22's subfamily	PL	Polysaccharide Lyases		172
PL25	ulvan lyase (EC 4.2.2.-).	PL	Polysaccharide Lyases		33
PL26	rhamnogalacturonan exolyase (EC 4.2.2.24).	PL	Polysaccharide Lyases		1256
PL27	L-rhamnose-alpha-1,4-D-glucuronate lyase (EC 4.2.2.-)	PL	Polysaccharide Lyases		239
PL29	hyaluronate lyase (EC 4.2.2.1); chondroitin-sulfate ABC endolyase (EC 4.2.2.20); dermatan sulfate lyase (4.2.2.-); dermatan sulfate lyase (EC 4.2.2.-)				324
PL3	pectate lyase (EC 4.2.2.2).	PL	Polysaccharide Lyases		2
PL30	hyaluronate lyase (EC 4.2.2.1)				12
PL31	endo-beta-1,4-glucuronan lyase (EC 4.2.2.14)				191
PL32	poly(beta-mannuronate) lyase / M-specific alginate lyase (EC 4.2.2.3)				1238
PL33	hyaluronate lyase (EC 4.2.2.1); gellan lyase (EC 4.2.2.25); chondroitin sulfate lyase (EC 4.2.2.20)				165
PL33_1	PL33's subfamily				385
PL33_2	PL33's subfamily				36
PL34	alginate lyase (EC 4.2.2.-)				1
PL35	chondroitin lyase / chondroitinase (EC 4.2.2.-); chondroitin AC lyase (EC 4.2.2.5)				428
PL37	chondroitin-sulfate ABC endolyase (EC 4.2.2.20); heparin-sulfate lyase / heparin lyase III (EC 4.2.2.8); ulvan lyase (EC 4.2.2.-)				172
PL3_1	PL3's subfamily	PL	Polysaccharide Lyases		7
PL3_2	PL3's subfamily	PL	Polysaccharide Lyases		334
PL3_5	PL3's subfamily	PL	Polysaccharide Lyases		4
PL4	rhamnogalacturonan endolyase (EC 4.2.2.23).	PL	Polysaccharide Lyases		306
PL4_1	PL4's subfamily	PL	Polysaccharide Lyases		15
PL4_2	PL4's subfamily	PL	Polysaccharide Lyases		2
PL4_3	PL4's subfamily	PL	Polysaccharide Lyases		4
PL4_4	PL4's subfamily	PL	Polysaccharide Lyases		218
PL4_5	PL4's subfamily	PL	Polysaccharide Lyases		8
PL5	alginate lyase (EC 4.2.2.3).	PL	Polysaccharide Lyases		49
PL6	alginate lyase (EC 4.2.2.3); chondroitinase B (EC 4.2.2.19); MG-specific alginate lyase (EC 4.2.2.-); poly(alpha-L-guluronate) lyase / G-specific alginate lyase (EC 4.2.2.11);	PL	Polysaccharide Lyases		152
PL6_1	PL6's subfamily	PL	Polysaccharide Lyases		430
PL6_2	PL6's subfamily	PL	Polysaccharide Lyases		19
PL6_3	PL6's subfamily	PL	Polysaccharide Lyases		17
PL7	poly(beta-mannuronate) lyase / M-specific alginate lyase (EC 4.2.2.3); alpha-L-guluronate lyase / G-specific alginate lyase (EC 4.2.2.11); poly-(MG)-lyase / MG-specific alginate lyase (EC 4.2.2.-); endo-beta-1,4-glucuronan lyase (EC 4.2.2.14)	PL	Polysaccharide Lyases		3
PL7_3	PL7's subfamily	PL	Polysaccharide Lyases		1
PL7_5	PL7's subfamily	PL	Polysaccharide Lyases		12
PL8	hyaluronate lyase (EC 4.2.2.1); chondroitin AC lyase (EC 4.2.2.5); xanthan lyase (EC 4.2.2.12); chondroitin ABC lyase (EC 4.2.2.20)	PL	Polysaccharide Lyases		62
PL8_2	PL8's subfamily	PL	Polysaccharide Lyases		8
PL8_3	PL8's subfamily	PL	Polysaccharide Lyases		102
PL8_4	PL8's subfamily				16
PL9	pectate lyase (EC 4.2.2.2); exopolygalacturonate lyase (EC 4.2.2.9); thiopeptidoglycan lyase (EC 4.2.2.-).	PL	Polysaccharide Lyases		2242
PL9_1	PL9's subfamily	PL	Polysaccharide Lyases		553
PL9_2	PL9's subfamily	PL	Polysaccharide Lyases		716
PL9_3	PL9's subfamily	PL	Polysaccharide Lyases		35
PL9_4	PL9's subfamily	PL	Polysaccharide Lyases		38
